# Supplementary material for: Mixing divalent ionic liquids: effects of charge and side-chains
Source: Royal Society of Chemistry journal article supplement (doi:10.1039/d1cp00208b), 2021-01-01
Supplement: d1cp00208b1.pdf [file d1cp00208b1.pdf]

## Mixing divalent ionic liquids: Effects of charge and side-chains

Eduards Bakis,<sup>a</sup> Adriaan van den Bruinhorst,<sup>b</sup> Laure Pison,<sup>b,d</sup> Ivan Palazzo,<sup>a</sup> Thomas Chang,<sup>a</sup> Marianne Kjellberg,<sup>a</sup> Cameron C. Weber,<sup>c</sup> Margarida Costa Gomes,<sup>\*b</sup> and Tom Welton<sup>\*a</sup>

<sup>a</sup> Department of Chemistry, Imperial College London, White City Campus, 80 Wood Lane, London W12 0BZ (UK)

<sup>b</sup> Laboratoire de Chimie de l'Ecole Normale Supérieure de Lyon, CNRS and University of Lyon, 46 Allée Italie, 69007 Lyon Cedex (France)

<sup>c</sup> School of Chemical Sciences, University of Auckland, 23 Symonds St, Auckland (New Zealand)

<sup>d</sup> Present address: Laboratoire Magmas et Volcans, CNRS and Clermont Auvergne University, 6 Avenue Blaise Pascal, TSA 60026 – CS 60026, 63178 Aubière, France

|                                                                |    |
|----------------------------------------------------------------|----|
| Ionic liquid structures and nomenclature                       | 2  |
| Synthetic procedures                                           | 4  |
| Thermal stability of monocationic and dicationic ionic liquids | 13 |
| Densities and excess molar volumes                             | 16 |
| Viscosities                                                    | 29 |
| Calorimetric data for mixing of ionic liquids                  | 31 |
| References                                                     | 46 |

## Ionic liquid structures and nomenclature

The *bis*(trifluoromethanesulfonyl)imide anion  $[\text{NTf}_2]^-$  was the ionic liquid anion of choice in this work. All imidazolium  $[\text{NTf}_2]^-$  salts with the cations depicted below are room temperature ionic liquids, except  $[\text{C}_{10}\text{C}_1\text{C}_1\text{C}_1\text{biim}][\text{NTf}_2]_2$  and  $[(\text{C}_4\text{im})_2\text{C}_1][\text{NTf}_2]_2$ .

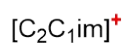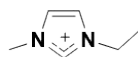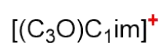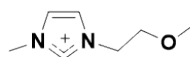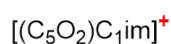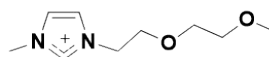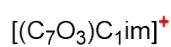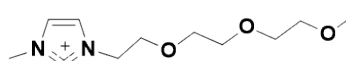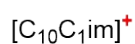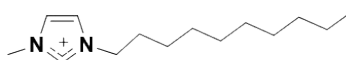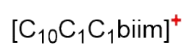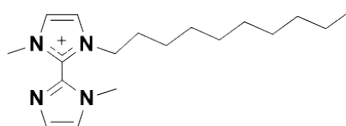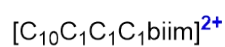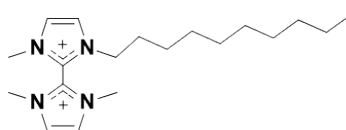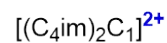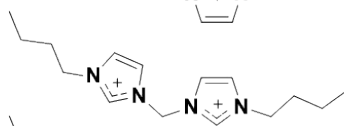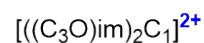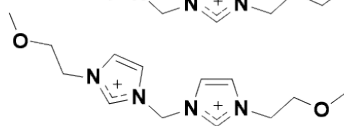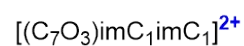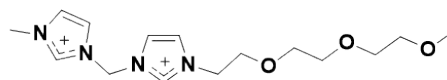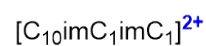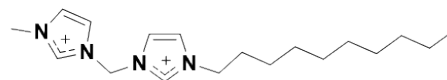

## Literature comparison

**Table S1**

Structures, abbreviations and melting points of divalent imidazolium cation  $[\text{NTf}_2]^-$  ILs selected from literature

| Structure                                                                         | Chg | Abbreviation                               | m.p.                                          |
|-----------------------------------------------------------------------------------|-----|--------------------------------------------|-----------------------------------------------|
|  | 2+  | $[(\text{C}_1\text{im})_2\text{C}_1]^{2+}$ | solid <sup>1,2</sup><br>90–94 °C <sup>3</sup> |
|  | 2+  | $[(\text{C}_1\text{im})_2\text{C}_3]^{2+}$ | 48–52 °C <sup>4</sup><br><25 °C <sup>5</sup>  |
|  | 2+  | $[(\text{C}_1\text{im})_2\text{C}_4]^{2+}$ | 54–56 °C <sup>3</sup>                         |

## Synthetic procedures

Syntheses were carried out under a nitrogen atmosphere using standard Schlenk techniques unless stated otherwise. The liquid alkylimidazoles were dried over KOH and distilled at reduced pressure prior to use. NMR spectra (Bruker Av-400) were referenced against the solvent residue signal (DMSO- $d_6$  = 2.50 ppm, CDCl<sub>3</sub> = 7.26 ppm). Melting points (*OptiMelt* MPA100) were read visually at a heating rate of 2 °C·min<sup>-1</sup>.

For quaternisations, haloethers were preferred over alkyl sulfonates because the first could easily be purified *via* vacuum distillation. Alkyl sulfonates were found to be thermally unstable at distillation conditions<sup>6</sup> and therefore irreversibly contaminate the final ILs. Reaction of crude alkylsulfonates with 1-methylimidazole at our reaction conditions led to formation of unidentified sideproducts in small quantities, as judged from NMR analysis.

Ionic liquids [C<sub>2</sub>C<sub>1</sub>im][NTf<sub>2</sub>]<sup>7</sup> and [C<sub>10</sub>C<sub>1</sub>im][NTf<sub>2</sub>]<sup>8</sup> were synthesized *via* the corresponding Br<sup>-</sup> salts as described before, and ILs with satisfactory analytical data were obtained.

**[(C<sub>3</sub>O)C<sub>1</sub>im][NTf<sub>2</sub>], *N*-(2-Methoxyethyl)-*N'*-methylimidazolium bis(Trifluoromethanesulfonyl)imide.** *N*-Methylimidazole (69.89 g, 852 mmol, 1.00 eq) was added dropwise to a solution of 2-chloroethylmethyl ether (121.71 g, 1287 mmol, 1.51 eq) in acetonitrile (30 mL) with stirring. The solution was stirred for 5 h at room temperature and then for a further 110 h at 80 °C. No residual *N*-methylimidazole could be detected (NMR) in the reaction mixture after this time. The volatiles were removed *via* rotary evaporation and the residue diluted with water (~250 mL). Powdered charcoal was added to the solution and it was stirred at 80 °C for 1 h, following a gradual cooling to room temperature and to 0 °C. The suspension was filtered through a glass fibre membrane; a nearly colourless solution (343.56 g) was obtained, which contained *N*-(2-methoxyethyl)-*N'*-methylimidazolium chloride (151.54 g, 44.1% w/w).

To an aqueous solution containing *N*-(2-methoxyethyl)-*N'*-methylimidazolium chloride (60.71 g, 343.9 mmol) a solution of lithium bis(trifluoromethanesulfonyl)imide (98.72 g, 343.9 mmol) in water (50 mL) was added. The mixture was extracted with dichloromethane (100 mL) and the organic phase washed with water (3 x 20 mL) until chloride-free by the silver nitrate test. The solution was filtered through the hydrophobic filter paper, evaporated *via* rotary evaporation and dried with stirring at 0.1 mbar, 60 °C for 24 h. A colourless liquid was obtained.

$\delta_{\text{H}}$  (400 MHz; DMSO- $d_6$ ) 3.27 (3 H, s, CH<sub>3</sub>), 3.65-3.70 (2 H, m, CH<sub>2</sub>), 3.86 (3 H, s, NCH<sub>3</sub>), 4.32-4.37 (2 H, m, CH<sub>2</sub>), 7.68 (1 H, t, <sup>3</sup>*J*<sub>HH</sub> 1.7 Hz, =CH), 7.72 (1 H, t, <sup>3</sup>*J*<sub>HH</sub> 1.7 Hz, =CH), 9.05 (1 H, bs, CH) ppm

$\delta_{\text{C}}$  (101 MHz; DMSO- $d_6$ ) 35.7, 48.7, 58.0, 69.6, 119.5 (q, <sup>1</sup>*J*<sub>13C-19F</sub> 323 Hz), 122.6, 123.5, 136.8 ppm

$\delta_{\text{F}}$  (377 MHz; DMSO- $d_6$ ) -79.2 ppm

ATR-FTIR,  $\nu$  (neat): 3160 (arom. H<sup>4/5</sup> stretch, w), 3123 (arom. H<sup>2</sup> stretch, w), 3103 (w), 2942 (w), 2900 (w), 2840 (w), 2824 (w), 1576 (m), 1567 (m), 1347 (s), 1330 (asym. S=O stretch, s), 1227 (sym. CF<sub>3</sub> str., s), 1177 (vs), 1133 (sym. S=O stretch, vs), 1083 (m), 1050 (vs), 1013 (s), 836 (s), 788 (s), 763 (s), 740 (s), 704 (w), 653 (s), 610 (vs) cm<sup>-1</sup>

*m/z* (ES<sup>+</sup>): 141 (100%, [(C<sub>3</sub>O)C<sub>1</sub>im]<sup>+</sup>)

*m/z* (ES<sup>-</sup>): 280 (100%, [NTf<sub>2</sub>]<sup>-</sup>)

**[(C<sub>5</sub>O<sub>2</sub>)C<sub>1</sub>im][NTf<sub>2</sub>], 1-(2-(2-Methoxyethoxy)ethyl)-3-methylimidazolium bis(Trifluoromethanesulfonyl)imide.** A solution of *N*-methylimidazole (25.28 g, 307.9 mmol, 1 eq) and 1-chloro-2-(2-methoxyethoxy)ethane<sup>9</sup> (49.58 g, 357.8 mmol, 1.16 eq) in acetonitrile (100 mL) was stirred in an oil bath (80 °C) for 8 days. The volatiles were removed *via* rotary evaporation and the residue dissolved in water (50 mL). The solution was transferred into a separatory funnel and a solution of lithium bis(trifluoromethanesulfonyl)imide (87.01 g, 303.1 mmol) in a minimal amount of water was added.

The mixture was extracted with dichloromethane (3x30 mL) and the organic phase washed with water until chloride-free. Dichloromethane was evaporated and the remaining ionic liquid dried at 60 °C. Powdered charcoal was carefully stirred into the coloured ionic liquid, and the drying continued. The mixture was cooled to room temperature and filtered at reduced pressure through a glass fibre membrane and 0.2 µm PTFE filter providing a colourless liquid (65.87 g, 45%).

$\delta_{\text{H}}$  (400 MHz; DMSO- $d_6$ ) 3.22 (3 H, s, OCH<sub>3</sub>), 3.40-3.44 (2 H, m, CH<sub>2</sub>), 3.53-3.56 (2 H, m, CH<sub>2</sub>), 3.76 (2 H, t,  $^3J_{\text{HH}}$  4.9 Hz, CH<sub>2</sub>), 3.86 (3 H, s, N-CH<sub>3</sub>), 4.34 (2 H, t,  $^3J_{\text{HH}}$  4.9 Hz, N-CH<sub>2</sub>), 7.67 (1 H, t,  $^3J_{\text{HH}}$  1.7 Hz, =CH), 7.71 (1 H, t,  $^3J_{\text{HH}}$  1.7 Hz, =CH), 9.05 (1 H, s, CH) ppm

$\delta_{\text{C}}$  (101 MHz; DMSO- $d_6$ ) 35.7, 48.9, 58.0, 68.2, 69.4, 71.1, 119.6 (q,  $^1J_{13\text{C}-19\text{F}}$  321 Hz), 122.7, 123.4, 136.9 ppm

$\delta_{\text{F}}$  (377 MHz; DMSO- $d_6$ ) -78.9 ppm

$m/z$  (ES<sup>+</sup>): 185 (100%, [RC<sub>1</sub>im]<sup>+</sup>)

$m/z$  (ES<sup>-</sup>): 280 (100%, [NTf<sub>2</sub>]<sup>-</sup>)

ATR-FTIR,  $\nu$  (neat): 3160 (arom. H<sup>4/5</sup> stretch, m), 3122 (arom. H<sup>2</sup> stretch, m), 2885 (aliph. C-H stretch, m), 1576 (m), 1567 (m), 1454 (m), 1349 (s), 1330 (asym. S=O stretch, vs), 1227 (sym. CF<sub>3</sub> str., m), 1178 (vs), 1132 (sym. S=O stretch, s), 1103 (s), 1052 (vs), 925 (m), 844 (m), 789 (m), 762 (m), 740 (s), 704 (m), 653 (s) cm<sup>-1</sup>

Elemental Analysis (expected): C, 28.52 (28.39); H, 3.59 (3.68); N, 9.10 (9.03) %

**2-(2-(2-Methoxyethoxy)ethoxy)ethyl Mesylate.** Triethylamine (98.86 g, 977 mmol) and triethylene glycol monomethylether (150.00 g, 914 mmol) was dissolved in dichloromethane (500 mL) and cooled to +5 °C by stirring in an ice-water bath. Under nitrogen, methanesulfonyl chloride (104.68 g, 914 mmol) from a dropping funnel was added to the cooled solution over 1 h. The white suspension which formed was further stirred at room temperature for 16 h. Water (300 mL) was added to the mixture. The organic phase was separated and extracted twice more with water (2x150 mL) following the drying over anhydrous sodium sulphate. Dichloromethane was removed *via* rotary evaporation and the yellowish liquid (184.06 g, 83%) was dried over anhydrous potassium carbonate and converted to the corresponding alkylbromide without purification (due to thermal decomposition the mesylate could not be purified by distillation).

$\delta_{\text{H}}$  (400 MHz; CDCl<sub>3</sub>) 2.95 (3 H, s, S-CH<sub>3</sub>), 3.23 (3 H, s, O-CH<sub>3</sub>), 3.38-3.43 (2 H, m, CH<sub>2</sub>), 3.47-3.57 (6 H, m, CH<sub>2</sub>), 3.61-3.65 (2 H, m, CH<sub>2</sub>), 4.22-4.26 (2 H, m, CH<sub>2</sub>) ppm

$\delta_{\text{C}}$  (101 MHz; CDCl<sub>3</sub>) 37.6, 58.9, 68.9, 69.4, 70.4 (2 C), 70.5, 71.8 ppm

**2-(2-(2-Methoxyethoxy)ethoxy)ethyl Bromide.** To a stirred solution of 2-(2-(2-methoxyethoxy)ethoxy)ethyl mesylate (184.0 g, 759 mmol, 1.0 eq) in dimethylformamide (250 mL) lithium bromide (99.0 g, 1139 mmol, 1.5 eq) was slowly added under a flow of nitrogen. The rate of addition was adjusted so the temperature of the mixture didn't rise above 50 °C. Dissolution and reappearance of a white solid was observed. The mixture was stirred for 48 h at room temperature, diluted with 0.5 L of ethyl acetate and after stirring for 12 more hours filtered using a sintered filter. The organic phase was washed with water (4 x 100 mL), aqueous lithium chloride (3 x 100 mL of a 5% solution), water (100 mL) and brine (100 mL). The organic phase was dried over anhydrous sodium sulphate, and ethyl acetate removed *via* rotary evaporation. The slightly yellow liquid, which contained no more traces of dimethylformamide, was dried over anhydrous potassium carbonate and distilled at reduced pressure to afford a colourless liquid (102.2 g, 59.3%).

$\delta_{\text{H}}$  (400 MHz; CDCl<sub>3</sub>) 3.35 (3 H, s, O-CH<sub>3</sub>), 3.44 (2 H, t,  $^3J_{\text{HH}}$  6.3 Hz, CH<sub>2</sub>), 3.50-3.55 (2 H, m, CH<sub>2</sub>), 3.60-3.68 (6 H, m, CH<sub>2</sub>), 3.78 (2 H, t,  $^3J_{\text{HH}}$  6.3 Hz, CH<sub>2</sub>) ppm

$\delta_{\text{C}}$  (101 MHz; CDCl<sub>3</sub>) 30.4, 59.1, 70.6, 70.7 (2 C), 71.24, 72.0 ppm

**[(C<sub>7</sub>O<sub>3</sub>)C<sub>1</sub>im][NTf<sub>2</sub>], 1-(2-(2-(2-Methoxyethoxy)ethyl)ethyl)-3-methylimidazolium bis(Trifluoromethanesulfonyl)imide.** To a stirred solution of 1-methylimidazole (30.76 g, 375 mmol, 1.0 eq) in acetonitrile (120 mL) 2-(2-(2-methoxyethoxy)ethoxy)ethyl bromide (102.20 g, 450 mmol, 1.2 eq) was slowly added dropwise over 10 minutes. The mixture was stirred at 60 °C for 48 h. The volatiles were removed *via* rotary evaporation and the residue washed by vigorously stirring with ethyl acetate for 10 min (4x100 mL) to remove the residual trace of 1-methylimidazole. The viscous oil that remained was dissolved in water (100 mL) and aqueous solution of lithium bis(trifluoromethanesulfonyl)imide (107.70 g, 375 mmol, 1.0 eq) in a minimal amount of water was added. The mixture was extracted with dichloromethane (100 mL) and the organic phase washed with water until chloride-free (3x50 mL). Dichloromethane was evaporated and the remaining ionic liquid dried at 60 °C. Powdered charcoal was carefully stirred into the coloured ionic liquid, and the drying continued for 12 h. The mixture was cooled to room temperature and filtered at reduced pressure through a glass fibre membrane and 20 µm PTFE filter providing a colourless liquid (146.76 g, 77%).

$\delta_{\text{H}}$  (400 MHz; DMSO-*d*<sub>6</sub>) 3.24 (3 H, s, O-CH<sub>3</sub>), 3.40-3.45 (2 H, m, CH<sub>2</sub>), 3.47-3.53 (4 H, m, CH<sub>2</sub>), 3.54-3.58 (2 H, m, CH<sub>2</sub>), 3.77 (2 H, t, <sup>3</sup>J<sub>HH</sub> 4.9 Hz, CH<sub>2</sub>), 3.86 (3 H, s, NCH<sub>3</sub>), 4.34 (2 H, t, <sup>3</sup>J<sub>HH</sub> 4.9 Hz, CH<sub>2</sub>), 7.67-7.70 (1 H, m, =CH), 7.72-7.72 (1 H, m, =CH), 9.04 (1 H, bs, NCHN) ppm

$\delta_{\text{C}}$  (101 MHz; DMSO-*d*<sub>6</sub>) 35.7, 48.7, 58.0, 68.1, 69.5 (2 C), 71.3, 119.5 (q, <sup>1</sup>J<sub>13C-19F</sub> 323 Hz), 122.7, 123.3, 136.9 ppm

$\delta_{\text{F}}$  (377 MHz; DMSO-*d*<sub>6</sub>) -78.9 ppm

*m/z* (ES<sup>+</sup>): 229 (100%, [RC<sub>1</sub>im]<sup>+</sup>), 185 (40%), 125 (40%)

*m/z* (ES<sup>-</sup>): 280 (100%, [NTf<sub>2</sub>]<sup>-</sup>)

ATR-FTIR,  $\nu$  (neat): 3157 (arom. H<sup>4/5</sup> stretch, m), 3120 (arom. H<sup>2</sup> stretch, m), 2883 (aliph. C-H stretch, m), 1575 (m), 1567 (m), 1451 (m), 1348 (s), 1331 (asym. S=O stretch, vs), 1227 (sym. CF<sub>3</sub> str., m), 1179 (vs), 1133 (sym. S=O stretch, s), 1109 (m), 1053 (vs), 934 (m), 849 (m), 789 (m), 762 (m), 739 (s), 704 (m), 653 (s) cm<sup>-1</sup>

Elemental Analysis (expected): C, 30.69 (30.65); H, 4.09 (4.16); N, 8.09 (8.25) %

**Na[im], Sodium imidazolid.** In a 500 mL round bottomed flask imidazole (59.60 g, 875 mmol, 1.00 eq) was mixed with sodium hydroxide pellets (36.05 g, 901 mmol, 1.03 eq) and water (ca. 3 mL) to form a wet mass. Toluene (250 mL) was added, and the mixture was efficiently and vigorously stirred under reflux (bath temperature 150-160 °C) using a Dean-Stark trap and a condenser. Most of the water was collected in the receiver within the next 4 h, and a partial crystallization of the mixture had occurred. The semi-solid mixture was crushed into powder with a spatula, and the reaction continued for 20 more hours. The crushing was repeated and after 1 more hour of refluxing the toluene was removed *via* rotary evaporation. Drying (0.1 mbar, 100 °C) afforded off-white crystals in a quantitative yield. The product is soluble in dimethylsulfoxide and dimethylformamide, and can be stored under nitrogen for extended period of time. The procedure can be scaled up without difficulty to at least 100 g of imidazole starting material, and provides a material in a physical form that is easy to handle.

$\delta_{\text{H}}$  (400 MHz; DMSO-*d*<sub>6</sub>) 6.68-6.76 (2 H, m, =CH), 7.10-7.19 (1 H, m, NCHN) ppm

$\delta_{\text{C}}$  (101 MHz; DMSO-*d*<sub>6</sub>) 125.2, 143.7 ppm

ATR-FTIR,  $\nu$ : 3083 (w), 2972 (w), 1460 (s), 1247 (m), 1229 (s), 1137 (m), 1111 (w), 1087 (s), 942 (w), 921 (s), 849 (m), 833 (s), 749 (vs), 683 (vs) cm<sup>-1</sup>

**1-(2-Methoxyethyl)imidazole.** Sodium imidazolid (147.27 g, 1.64 mol, 1.00 eq) was suspended in acetonitrile (600 mL) and 2-chloroethyl methyl ether (146.84 g, 1.55 mol, 0.95 eq) was added dropwise over 1 h. The mixture was stirred at room temperature for 3 h and then heated under reflux for 13 h. After cooling to room temperature the suspension was filtered over a sintered filter, the solids washed with acetonitrile (2 x 70 mL) and the filtrate concentrated by rotary evaporation. The remaining dark, viscous oil was stirred with potassium hydroxide overnight and distilled at reduced pressure (101 °C, 0.7 mbar) providing a colourless liquid with a characteristic peanut butter odour (172.55 g, 88%).

$\delta_{\text{H}}$  (400 MHz;  $\text{CDCl}_3$ ) 3.31 (3 H, s,  $\text{OCH}_3$ ), 3.60 (2 H, t,  $^3J_{\text{HH}}$  5.1 Hz,  $\text{CH}_2$ ), 4.07 (2 H, t,  $^3J_{\text{HH}}$  5.1 Hz,  $\text{CH}_2$ ), 6.95 (1 H, s,  $=\text{CH}$ ), 7.02 (1 H, s,  $=\text{N}-\text{CH}=\text{N}$ ), 7.54 (1 H, s, NCHN) ppm  
 $\delta_{\text{C}}$  (101 MHz;  $\text{CDCl}_3$ ) 47.1, 59.1, 71.8, 119.5, 129.0, 137.5 ppm

**$[(\text{C}_3\text{Oim})_2\text{C}_1]\text{Br}_2$ , Methylene bis(3-(2-methoxyethyl)imidazolium dibromide.** Dibromomethane (61.13 g, 352 mmol, 1.0 eq) was added to a solution of 1-(2-methoxyethyl)imidazole (110.91 g, 879 mmol, 2.5 eq) in acetonitrile (200 mL). The mixture was stirred at 90 °C for 96 h. The volatiles were removed *via* rotary evaporation, the residue crushed and washed with ethyl acetate (2x100 mL). The dark crystalline material was dissolved in water (300 mL) and stirred overnight with powdered charcoal at 70 °C. The mixture was cooled to room temperature, filtered through a glass fibre membrane and a cellulose syringe-filter, and evaporated to dryness. Toluene was added and azeotropically distilled off to remove water from the material (2x100 mL). Recrystallization from ethanol with dropwise addition of ethyl acetate was done; the product was allowed to crystallize at -20 °C, filtered *via* canula and washed with cold absolute ethanol (3x70 mL), ethyl acetate (70 mL) and dried at reduced pressure (100 °C, 0.1 mbar). Snow white crystals (113.86 g, 76%, m.p. 162.0-164.0 °C).

$\delta_{\text{H}}$  (400 MHz;  $\text{DMSO}-d_6$ ) 3.27 (6 H, s,  $\text{OCH}_3$ ), 3.72 (4 H, t,  $^3J_{\text{HH}}$  4.8 Hz,  $\text{CH}_2$ ), 4.44 (4 H, t,  $^3J_{\text{HH}}$  4.8 Hz,  $\text{CH}_2$ ), 6.84 (2 H, s,  $\text{NCH}_2\text{N}$ ), 7.89-7.92 (2 H, m,  $=\text{CH}$ ), 8.17-8.21 (2 H, m,  $=\text{CH}$ ), 9.71 (2 H, s, NCHN) ppm  
 $\delta_{\text{C}}$  (101 MHz;  $\text{DMSO}-d_6$ ) 49.2, 57.9, 58.1, 69.2, 121.9, 123.5, 137.9 ppm

**$[(\text{C}_3\text{Oim})_2\text{C}_1][\text{NTf}_2]_2$ , Methylene bis(3-(2-methoxyethyl)imidazolium bis(trifluoromethanesulfonyl)imide.** Methylene bis(3-(2-methoxyethyl)imidazolium dibromide (83.79 g, 197 mmol, 1 eq) was dissolved in water (100 mL) and a solution of lithium bis(trifluoromethanesulfonyl)imide (112.89 g, 395 mmol, 2.0 eq) in a minimal amount of water was added. The mixture was extracted with ethyl acetate (3x50 mL) and the organic phase washed with water until halide-free. Ethyl acetate was evaporated and the remaining ionic liquid dried at reduced pressure (70 °C, 0.1 mbar) to afford an almost colourless viscous liquid (137.70 g, 85%).

$\delta_{\text{H}}$  (400 MHz;  $\text{DMSO}-d_6$ ) 3.29 (6 H, s,  $\text{OCH}_3$ ), 3.70 (4 H, t,  $^3J_{\text{HH}}$  4.8 Hz,  $\text{CH}_2$ ), 4.42 (4 H, t,  $^3J_{\text{HH}}$  4.8 Hz,  $\text{CH}_2$ ), 6.64 (2 H, s,  $\text{NCH}_2\text{N}$ ), 7.81-7.84 (2 H, m,  $=\text{CH}$ ), 7.96-7.99 (2 H, m,  $=\text{CH}$ ), 9.39-9.41 (2 H, s, NCHN) ppm  
 $\delta_{\text{C}}$  (101 MHz;  $\text{DMSO}-d_6$ ) 49.2, 58.1, 58.4, 69.3, 119.5 (q,  $^1J_{13\text{C}-19\text{F}}$  322 Hz), 122.0, 123.7, 137.9 ppm  
 $\delta_{\text{F}}$  (377 MHz;  $\text{DMSO}-d_6$ ) -78.8 ppm

ATR-FTIR,  $\nu$  (neat): 3156 (arom.  $\text{H}^{4/5}$  stretch, m), 3115 (m), 2943 (m), 2901 (m), 2843 (w), 1578 (m), 1567 (m), 1550 (m), 1454 (m), 1346 (s), 1327 (asym. S=O stretch, s), 1227 (sym.  $\text{CF}_3$  str., m), 1178 (vs), 1131 (sym. S=O stretch, vs), 1085 (s), 1051 (vs), 1013 (s), 969 (m), 941 (w), 838 (m), 790 (s), 771 (s), 764 (s), 740 (s), 654 (s)  $\text{cm}^{-1}$

$m/z$  ( $\text{ES}^+$ ): 207 (100%,  $[(\text{RimC}_1\text{im})^+]$ ), 133 (65%,  $[(\text{Rim})_2\text{C}_1]^{2+}/2$ ), 265 (40%,  $[(\text{Rim})_2\text{C}_1]^{2+}-\text{H}^+$ )

$m/z$  ( $\text{ES}^-$ ): 280 (100%,  $[\text{NTf}_2]^-$ )

Elemental Analysis (expected): C, 24.58 (24.70); H, 2.69 (2.68); N, 10.15 (10.17) %

**$[(\text{C}_4\text{im})_2\text{C}_1]\text{Br}_2$ , 1,1'-Dibutyl-3,3'-methylidene-bis-imidazolium dibromide** was prepared as described before,<sup>10</sup> m.p. 180.4-185.5 °C (lit.<sup>10</sup> 178.6 °C). White crystalline material with satisfying analytical data was obtained.

$\delta_{\text{H}}$  (400 MHz;  $\text{DMSO}-d_6$ ) 0.90 (6 H, t,  $^3J_{\text{HH}}$  7.2 Hz,  $\text{CCH}_3$ ), 1.28 (4 H, sextet,  $^3J_{\text{HH}}$  7.5 Hz,  $\text{CH}_2\text{CH}_3$ ), 1.79 (4 H, quintet,  $^3J_{\text{HH}}$  7.4 Hz,  $\text{NCH}_2\text{CH}_2$ ), 4.24 (4 H, t,  $^3J_{\text{HH}}$  7.2 Hz,  $\text{NCH}_2$ ), 6.75 (2 H, s,  $\text{NCH}_2\text{N}$ ), 7.92-7.95 (2 H, m,  $=\text{CH}$ ), 8.12-8.16 (2 H, m,  $=\text{CH}$ ), 9.69 (2 H, bs,  $\text{N}-\text{CH}=\text{N}$ ) ppm

$m/z$  ( $\text{ES}^+$ ): 207 (100%,  $[(\text{RimC}_1\text{im})]$ ), 133 (65%,  $[(\text{Rim})_2\text{C}_1]^{2+}/2$ ), 265 (40%,  $[(\text{Rim})_2\text{C}_1]^{2+}-\text{H}^+$ )

ATR-FTIR,  $\nu$ : 3494 (w), 3436 (w), 3129 (w), 3050 (s), 2962 (s), 2937 (m), 2872 (m), 1680 (w), 1628 (w), 1579 (m), 1546 (s), 1465 (m), 1435 (s), 13734369 (m), 1332 (m), 1303 (m), 1257 (w), 1227 (w),

1170 (vs), 1124 (m), 1053 (m), 1027 (w), 981 (w), 946 (w), 900 (m), 871 (m), 787 (s), 761 (s), 678 (w), 658 (w)  $\text{cm}^{-1}$

**[(C<sub>4</sub>im)<sub>2</sub>C<sub>1</sub>][NTf<sub>2</sub>]<sub>2</sub>, 1,1'-Dibutyl-3,3'-methylidene-bis-imidazolium bis(trifluoromethanesulfonyl)imide** was prepared *via* aqueous metathesis between the corresponding bromide and lithium bis(trifluoromethanesulfonyl)imide as described for [(C<sub>3</sub>Oim)<sub>2</sub>C<sub>1</sub>][NTf<sub>2</sub>]<sub>2</sub>. White crystalline material with satisfying analytical data was obtained, m.p. 58.6-59.3 °C.

$\delta_{\text{H}}$  (400 MHz; DMSO-*d*<sub>6</sub>) 0.91 (6 H, t, <sup>3</sup>J<sub>HH</sub> 7.3 Hz, CCH<sub>3</sub>), 1.30 (4 H, sextet, <sup>3</sup>J<sub>HH</sub> 7.5 Hz, CH<sub>2</sub>CH<sub>3</sub>), 1.79 (4 H, quintet, <sup>3</sup>J<sub>HH</sub> 7.3 Hz, NCH<sub>2</sub>CH<sub>2</sub>), 4.22 (4 H, t, <sup>3</sup>J<sub>HH</sub> 7.2 Hz, NCH<sub>2</sub>), 6.59 (2 H, s, NCH<sub>2</sub>N), 7.86-7.89 (2 H, m, =CH), 7.95-7.98 (2 H, m, =CH), 9.39 (2 H, bs, N-CH=N) ppm

$\delta_{\text{C}}$  (101 MHz; DMSO-*d*<sub>6</sub>) 13.2, 18.8, 31.1, 49.1, 58.4, 119.5 (q, <sup>1</sup>J<sub>13C-19F</sub> 322 Hz), 122.3, 123.2, 137.5 ppm

$\delta_{\text{F}}$  (377 MHz; DMSO-*d*<sub>6</sub>) -78.8 ppm

ATR-FTIR,  $\nu$ : 3165 (w), 3153 (w), 3138 (w), 3060 (w), 2971 (w), 2943 (w), 2883 (w), 1580 (w), 1551 (m), 1460 (w), 1346 (s), 1327 (s), 1227 (m), 1178 (vs), 1163 (vs), 1133 (vs), 1052 (vs), 948 (w), 909 (w), 848 (m), 789 (s), 768 (s), 754 (s), 739 (s), 697 (w), 652 (w)  $\text{cm}^{-1}$

Elemental Analysis (expected): C, 27.53 (27.74); H, 3.02 (3.19); N, 10.11 (10.22) %

**1,1'-Dimethyl-2,2'-biimidazole.** A literature procedure<sup>11</sup> was adapted for a multi-gram scale. To a stirred suspension of copper(I) chloride (7.22 g, 73 mmol, 0.095 eq) and 2-hydroxypyridine sodium salt (17.20 g, 148 mmol, 0.19 eq, **Note 1**) in xylenes (330 mL, **Note 2**) 1-methylimidazole (63.24 g, 770 mmol, 1.00 eq) was added dropwise. The mixture was heated under reflux while dry air was bubbled through (**Note 3**). After all the 1-methylimidazole had been consumed (**Note 4**) the volatiles were removed *via* rotary evaporation and the black residue dried (80 °C, 10 mbar) followed by a sublimation (110 °C, 0.1 mbar, ~12 h, **Note 5**). Large snow-white crystals were obtained (52.56 g, 84%).

**Note 1:** Equimolar amounts of 2-hydroxypyridine and methanolic sodium methoxide were mixed, evaporated and dried (70 °C, 0.1 mbar) to afford 2-hydroxypyridine sodium salt, which was used without further purification.

**Note 2:** The reaction was also attempted in toluene - at the boiling point of this solvent no conversion was observed.

**Note 3:** An aquarium pump was used; the air was first passed through a wash bottle containing concentrated sulfuric acid. The gas flow was adjusted so the boiling xylenes weren't excessively lost from the mixture. The gas inlet tube was at least 5 mm in diameter to avoid getting blocked. See the figure for a schematic setup.

**Note 4:** Stirring and refluxing was stopped from time to time, and the clear solvent phase analysed by <sup>1</sup>H NMR in CDCl<sub>3</sub>. The methyl signal of the product appeared at 4.05 ppm while that of 1-methylimidazole at 3.60 ppm.

When the refluxing, stirring and aeration was efficient, 8 hours of reaction time were sufficient to achieve a complete consumption of 1-methylimidazole.

**Note 5:** A large glass vessel with air-cooled surfaces is sufficient for sublimation.

$\delta_{\text{H}}$  (400 MHz; CDCl<sub>3</sub>) 3.96 (6 H, s, CH<sub>3</sub>), 6.89 (2 H, s, =CH), 7.04 (2 H, s, =CH) ppm

$\delta_{\text{C}}$  (101 MHz; CDCl<sub>3</sub>) 35.3, 122.6, 127.8, 138.6 ppm

*m/z* (ES<sup>+</sup>): 161 (100%, M<sup>+</sup>), 107 (20%)

**[C<sub>10</sub>C<sub>1</sub>C<sub>1</sub>biim]Br, 1-Decyl-1',3-dimethyl-2,2'-biimidazolium bromide.** To neat 1-bromodecane (150 mL, 723 mmol, 3.5 eq) crystalline 1,1'-dimethyl-2,2'-biimidazole (33.84 g, 209 mmol, 1.0 eq) was added, and the mixture stirred at 120 °C for 6 h. The biimidazole initially dissolved providing a clear solution, soon after which fine crystals started to form. After stirring at 120 °C the mixture was cooled to room temperature, diluted with ethyl acetate (60 mL) and cooled at -20 °C for 0.5 h. The crystals

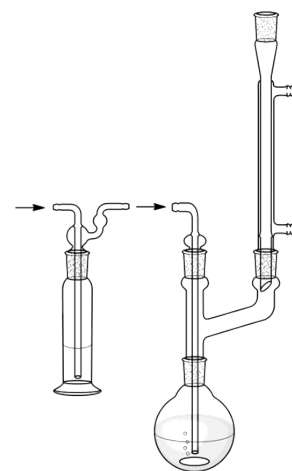



were filtered *via* suction filtration, washed on the filter with ethyl acetate (3x50 mL) and ether (50 mL), air-dried and recrystallized from boiling ethyl acetate with dropwise addition of propanol-2. The solution was allowed to crystallize until the mixture reached room temperature, and further cooled at -20 °C for 0.5 h. The product was collected *via* suction filtration and washed with ethyl acetate (3x50 mL) and ether (50 mL), and dried in air. Snow-white flaky crystals (50.05 g, 63%, m.p. 204.0-205.0 °C).

$\delta_{\text{H}}$  (400 MHz; DMSO-*d*<sub>6</sub>) 0.83 (3 H, t,  $^3J_{\text{HH}}$  6.9, C-CH<sub>3</sub>), 1.04-1.29 (14 H, m, (CH<sub>2</sub>)<sub>7</sub>), 1.65 (2 H, m, CH<sub>2</sub>), 3.71 (3 H, s, NCH<sub>3</sub>), 3.75 (3 H, s, NCH<sub>3</sub>) 4.04 (2 H, m, NCH<sub>2</sub>), 7.33 (1 H, m, =CH), 7.73 (1 H, m, =CH), 8.11 (1 H, d,  $^3J_{\text{HH}}$  2.2 Hz, =CH), 8.19 (1 H, d,  $^3J_{\text{HH}}$  2.2 Hz, =CH) ppm

$\delta_{\text{C}}$  (101 MHz; DMSO-*d*<sub>6</sub>) 13.9, 22.1, 25.2, 28.1, 28.6, 28.7, 28.8, 29.1, 31.3, 33.8, 35.8, 48.7, 123.5, 125.1, 126.2, 128.3, 130.9, 134.5 ppm

ATR-FTIR,  $\nu$ : 3478 (w), 3419 (w), 3071 (m), 3044 (m), 2994 (m), 2953 (m), 2919 (s), 2851 (m), 1800 (w), 1709 (w), 1603 (m), 1520 (s), 1468 (vs), 1419 (s), 1404 (m), 1380 (w), 1360 (w), 1329 (w), 1310 (w), 1278 (s), 1240 (s), 1202 (m), 1143 (m), 1098 (w), 1078 (m), 1059 (w), 1030 (m), 918 (m), 862 (w), 810 (s), 780 (vs), 761 (s), 731 (vs), 722 (s), 705 (s), 667 (w) cm<sup>-1</sup>

*m/z* (ES<sup>+</sup>): 303 (100%, [(C<sub>10</sub>C<sub>1</sub>C<sub>1</sub>biim)]<sup>+</sup>)

*m/z* (ES<sup>-</sup>): 81 (100%, <sup>81</sup>Br<sup>-</sup>), 79 (95%, <sup>79</sup>Br<sup>-</sup>)

Elemental Analysis (expected): C, 56.22 (56.39); H, 8.17 (8.15); N, 14.48 (14.61) %

**[C<sub>10</sub>C<sub>1</sub>C<sub>1</sub>biim][NTf<sub>2</sub>], 1-Decyl-1',3-dimethyl-2,2'-biimidazolium bis(trifluoromethanesulfonyl)imide.** To a solution of [C<sub>10</sub>C<sub>1</sub>C<sub>1</sub>biim]Br, 1-decyl-1',3-dimethyl-2,2'-biimidazolium bromide (20.91 g, 55 mmol, 1 eq) in water (80 mL) a solution of lithium bis(trifluoromethanesulfonyl)imide (15.66 g, 55 mmol, 1 eq) in a minimal amount of water was added. The mixture was extracted with dichloromethane (2x50 mL) and the organic phase washed with water until halide-free. The dichloromethane solution was filtered through the hydrophobic filter paper, treated with powdered charcoal, filtered *via* gravity and then through a 0.2  $\mu\text{m}$  PTFE filter, and evaporated *via* rotary evaporation. Drying at reduced pressure (70 °C, 0.1 mbar) afforded an almost colourless viscous liquid (27.30 g, 86%).

$\delta_{\text{H}}$  (400 MHz; DMSO-*d*<sub>6</sub>) 0.81-0.90 (3 H, s, CCH<sub>3</sub>), 1.08-1.32 (14 H, m, (CH<sub>2</sub>)<sub>7</sub>), 1.63-1.74 (2 H, m, CH<sub>2</sub>), 3.71 (3 H, s, NCH<sub>3</sub>), 3.76 (3 H, s, <sup>+</sup>NCH<sub>3</sub>), 4.05 (2 H, t,  $^3J_{\text{HH}}$  4.8 Hz, NCH<sub>2</sub>), 7.33 (1 H, bs, =CH), 7.65 (1 H, bs, =CH), 8.00 (1 H, d,  $^3J_{\text{HH}}$  4.8 Hz, =CH), 8.07 (1 H, d,  $^3J_{\text{HH}}$  2.1 Hz, =CH) ppm

$\delta_{\text{C}}$  (101 MHz; DMSO-*d*<sub>6</sub>) 13.7, 22.0, 25.2, 28.1, 28.58, 28.64, 28.8, 29.1, 31.2, 33.5, 35.6, 48.8, 119.5 (q,  $^1J_{13\text{C}-19\text{F}}$  324 Hz), 123.4, 125.0, 126.0, 128.2, 130.9, 134.7 ppm

$\delta_{\text{F}}$  (377 MHz; DMSO-*d*<sub>6</sub>) -78.9 ppm

ATR-FTIR,  $\nu$  (neat): 3148 (arom. H<sup>4/5</sup> stretch, w), 2928 (m), 2857 (m), 1605 (w), 1520 (m), 1466 (m), 1420 (w), 1348 (s), 1331 (asym. S=O stretch, s), 1281 (m), 1227 (sym. CF<sub>3</sub> str., s), 1179 (vs), 1134 (sym. S=O stretch, s), 1054 (vs), 918 (m), 786 (m), 762 (m), 740 (m), 726 (m), 653 (m) cm<sup>-1</sup>

*m/z* (ES<sup>+</sup>): 303 (100%, [(C<sub>10</sub>C<sub>1</sub>C<sub>1</sub>biim)]<sup>+</sup>)

*m/z* (ES<sup>-</sup>): 280 (100%, [NTf<sub>2</sub>]<sup>-</sup>)

Elemental Analysis (expected): C, 41.08 (41.16); H, 5.20 (5.35); N, 11.92 (12.00) %

**[C<sub>10</sub>C<sub>1</sub>C<sub>1</sub>C<sub>1</sub>biim][NTf<sub>2</sub>]<sub>2</sub>, 1-Decyl-1',3,3'-trimethyl-2,2'-biimidazolium bis(trifluoromethanesulfonyl)imide.** 1-Decyl-1',3-dimethyl-2,2'-biimidazolium bromide (22.13 g, 58 mmol, 1 eq) was stirred with dimethylsulfate (60 mL, 11 eq) for 21 h at 130 °C under nitrogen. Ethyl acetate (300 mL) and water (100 mL) was added to a cooled mixture; it was slowly stirred until two clear layers separated. The ethyl acetate layer was cannulated off and residue washed twice more with ethyl acetate (2x50 mL). Powdered charcoal was added to the aqueous phase, and after it was stirred for 1 h the mixture was filtered through a glass fibre membrane. Aqueous lithium bis(trifluoromethanesulfonyl)imide (33.14 g, 116 mmol, 2 eq) was added to the clear filtrate. The mixture was extracted with ethyl acetate (3x20 mL) and the organic phase washed with water until bromide-free. Ethyl acetate was evaporated and the

remaining ionic liquid dried at reduced pressure (90 °C, 0.1 mbar) to afford an almost colourless material (38.00 g, 75% in two steps, m.p. 60.0-63.0 °C).

$\delta_{\text{H}}$  (400 MHz; DMSO- $d_6$ ) 0.85 (3 H, m, C-CH<sub>3</sub>), 1.13-1.31 (14 H, m, (CH<sub>2</sub>)<sub>7</sub>), 1.68-1.80 (2 H, m, CH<sub>2</sub>), 3.83 (3 H, s, NCH<sub>3</sub>), 3.85 (6 H, s, <sup>+</sup>NCH<sub>3</sub>) 4.10 (2 H, t, <sup>3</sup>J<sub>HH</sub> 7.3 Hz, NCH<sub>2</sub>), 8.28 (2 H, s, CH=CH), 8.34 (1 H, d, <sup>3</sup>J<sub>HH</sub> 2.0 Hz, -CH=C), 8.39 (1 H, <sup>3</sup>J<sub>HH</sub> 2.2 Hz, -CH=C), 8.19 (1 H, d, <sup>3</sup>J<sub>HH</sub> 2.1 Hz, -CH=C) ppm

$\delta_{\text{C}}$  (101 MHz; DMSO- $d_6$ ) 13.9, 22.1, 25.4, 28.5, 28.7, 28.8, 28.9, 29.1, 31.3, 36.38, 36.41, 49.3, 119.5 (q, <sup>1</sup>J<sub>13C-19F</sub> 321 Hz), 124.1, 124.6, 126.3, 128.2, 128.8 ppm

$\delta_{\text{F}}$  (377 MHz; DMSO- $d_6$ ) -78.7 ppm

ATR-FTIR,  $\nu$ : 3143 (arom. H<sup>4/5</sup> stretch, m), 2930 (m), 2860 (w), 1566 (w), 1532 (w), 1515 (w), 1459 (w), 1343 (s), 1328 (asym. S=O stretch, s), 1232 (sym. CF<sub>3</sub> str., s), 1182 (vs), 1134 (sym. S=O stretch, vs), 1051 (vs), 789 (m), 758 (m), 740 (m), 653 (m) cm<sup>-1</sup>

$m/z$  (ES<sup>+</sup>): 157 (100%), 159 (60%, [C<sub>10</sub>C<sub>1</sub>C<sub>1</sub>C<sub>1</sub>biim]<sup>2+</sup>/2), 317 (60%, [C<sub>10</sub>C<sub>1</sub>C<sub>1</sub>C<sub>1</sub>biim]<sup>2+</sup>-H<sup>+</sup>)

$m/z$  (ES<sup>-</sup>): 280 (100%, [NTf<sub>2</sub>]<sup>-</sup>)

Elemental Analysis (expected): C, 31.38 (31.44); H, 3.88 (3.90); N, 9.64 (9.56) %

**bis(Imidazol-1-yl)methane.** Imidazole (43.0 g, 632 mmol, 1 eq), potassium hydroxide (86.0 g, 1536 mmol, 2.4 eq), and a small amount of water (<5 mL) were mixed together to provide a viscous syrupy liquid. Tetrabutylammonium bromide (4.2 g, 13 mmol, 0.021 eq) and dichloromethane (250 mL) was added, and the mixture vigorously stirred and heated under reflux for 24 h. The volatiles were removed *via* rotary evaporation and the remaining solid dried (80 °C, 0.1 mbar). The residue was crushed and vigorously stirred with ether (400 mL) to extract any remaining liquid contaminants and water. The suspension was filtered over a sintered filter, dried (80 °C, 10 mbar) and transferred into a wide-mouth glass vessel with air-cooled walls. Sublimation was performed by heating the vessel (140 to 180 °C, 0.1 mbar, 24 h). Snow-white crystals (36.0 g, 77%) were collected.

$\delta_{\text{H}}$  (400 MHz; CDCl<sub>3</sub>) 6.00 (2 H, s, CH<sub>2</sub>), 6.98 (2 H, bs, =CH), 7.11 (2 H, bs, =CH), 7.64 (2 H, bs, NCHN) ppm

$\delta_{\text{C}}$  (101 MHz; CDCl<sub>3</sub>) 56.4, 118.2, 131.3, 136.7 ppm

[C<sub>1</sub>imC<sub>1</sub>im]I, **1-(Imidazol-1-ylmethyl)-3-methylimidazolium iodide** was prepared according to a reported procedure.<sup>12</sup>

**1-((3-Decylimidazolium-1-ylmethyl)-3-methylimidazolium iodide/bromide.** 1-(imidazol-1-ylmethyl)-3-methylimidazolium iodide<sup>12</sup> (5.06 g, 17.4 mmol, 1.0 eq) and bromodecane (10.81 g, 48.9 mmol, 2.8 eq) were added to acetonitrile (50 mL) in a glass pressure ampoule (170 mL), and the mixture stirred at 80 °C for 37 h. The mixture was cooled to room temperature and diluted with ethyl acetate (25 mL). The white precipitate was collected by suction filtration and thoroughly washed with cold acetonitrile (5x5 mL) to completely remove traces of bromodecane. Drying in air afforded an off-white solid (7.08 g), which provided an elemental analysis not matching a stoichiometric ratio of anions.

$\delta_{\text{H}}$  (400 MHz; DMSO- $d_6$ ) 0.79-0.88 (3 H, m, C-CH<sub>3</sub>), 1.16-1.33 (14 H, m, (CH<sub>2</sub>)<sub>7</sub>), 1.73-1.85 (2 H, m, CH<sub>2</sub>), 3.91 (3 H, s, NCH<sub>3</sub>), 4.22 (2 H, t, <sup>3</sup>J<sub>HH</sub> 7.3 Hz, NCH<sub>2</sub>), 6.78 (2 H, s, NCH<sub>2</sub>N), 7.84 (1 H, bs, -CH=C), 7.94 (1 H, bs, -CH=C), 8.14 (2 H, bs, -CH=C), 9.60 (1 H, bs, NCHN), 9.69 (1 H, bs, NCHN) ppm

$\delta_{\text{C}}$  (101 MHz; DMSO- $d_6$ ) 14.0, 22.1, 25.5, 28.4, 28.7, 28.8, 28.9, 29.1, 31.3, 36.3, 49.3, 57.9, 121.9, 122.1, 123.0, 124.3, 137.4, 138.1 ppm

ATR-FTIR,  $\nu$ : 3127 (w), 3053 (s), 2959 (s), 2920 (s), 2851 (w), 1661 (w), 1582 (m), 1545 (s), 1467 (m), 1428 (s), 1379 (w), 1328 (m), 1295 (w), 1172 (vs), 861 (m), 761 (vs), 654 (m) cm<sup>-1</sup>

$m/z$  (ES<sup>+</sup>): 193 (100%), 194 (40%), 303 (30% [C<sub>10</sub>imC<sub>1</sub>imC<sub>1</sub>]<sup>2+</sup>-H<sup>+</sup>)

$m/z$  (ES<sup>-</sup>): 127 (100%, I<sup>-</sup>), 81 (35%, <sup>81</sup>Br), 79 (35%, <sup>79</sup>Br)

**[C<sub>10</sub>imC<sub>1</sub>imC<sub>1</sub>][NTf<sub>2</sub>]<sub>2</sub>, 1-((3-decylimidazolium-1-ylmethyl)-3-methylimidazolium bis(trifluoromethanesulfonyl)imide.** To a solution of 1-((3-decylimidazolium-1-ylmethyl)-3-methylimidazolium iodide/bromide (6.96 g, 15.0 mmol assuming dibromide, 1 eq) in water (80 mL) a spoonful of powdered charcoal was added. The mixture was stirred at 60 °C for 1 h, cooled to room temperature, following a filtration *via* gravity and cellulose syringe filter. A solution of lithium bis(trifluoromethanesulfonyl)imide (15.66 g, 55 mmol, 1 eq) in a minimal amount of water was added to the filtrate. The mixture was extracted with dichloromethane (2x80 mL) and the organic phase washed with water until halide-free. The dichloromethane solution was evaporated *via* rotary evaporation. Drying at reduced pressure (70 °C, 0.1 mbar) afforded an almost colourless, very viscous liquid (10.53 g, 81% in two steps).

$\delta_{\text{H}}$  (400 MHz; DMSO-*d*<sub>6</sub>) 0.81-0.87 (3 H, m, C-CH<sub>3</sub>), 1.17-1.34 (14 H, m, (CH<sub>2</sub>)<sub>7</sub>), 1.71-1.85 (2 H, m, CH<sub>2</sub>), 3.90 (3 H, s, NCH<sub>3</sub>), 4.20 (2 H, t, <sup>3</sup>J<sub>HH</sub> 7.4 Hz, NCH<sub>2</sub>), 6.60 (2 H, s, NCH<sub>2</sub>N), 7.76-7.79 (1 H, m, -CH=C), 7.86-7.88 (1 H, m, -CH=C), 7.92-7.97 (2 H, bs, -CH=C), 9.32 (1 H, bs, NCHN), 9.38 (1 H, bs, NCHN) ppm

$\delta_{\text{C}}$  (101 MHz; DMSO-*d*<sub>6</sub>) 13.9, 22.1, 25.5, 28.4, 28.7, 28.8, 28.9, 29.2, 31.3, 36.2, 49.3, 58.3, 119.5 (q, <sup>1</sup>J<sub>13C-19F</sub> 322 Hz), 122.0, 122.2, 123.2, 124.5, 137.4, 138.1 ppm

$\delta_{\text{F}}$  (377 MHz; DMSO-*d*<sub>6</sub>) -78.9 ppm

ATR-FTIR,  $\nu$ : 3149 (w), 3117 (w), 2929 (w), 2859 (w), 1568 (w), 1460 (w), 1346 (s), 1328 (s), 1225 (m), 1176 (ws), 1131 (ws), 1052 (ws), 850 (w), 790 (m), 772 (m), 764 (m), 740 (s), 861 (m), 654 (w) cm<sup>-1</sup>

$m/z$  (ES<sup>+</sup>): 193 (100%), 115 (40%), 103 (40%), 83 (40%), 173 (35%), 194 (35%), 303 (30%), [C<sub>10</sub>imC<sub>1</sub>imC<sub>1</sub>]<sup>2+</sup>-H<sup>+</sup>)

$m/z$  (ES<sup>-</sup>): 280 (100%, [NTf<sub>2</sub>]<sup>-</sup>)

Elemental Analysis (expected): C, 30.49 (30.56); H, 3.63 (3.73); N, 9.61 (9.72) %

**[(C<sub>7</sub>O<sub>3</sub>)imC<sub>1</sub>imC<sub>1</sub>][NTf<sub>2</sub>]<sub>2</sub>.** 1-(imidazol-1-ylmethyl)-3-methylimidazolium iodide<sup>12</sup> (5.30 g, 18.3 mmol, 1.0 eq) and 2-(2-(2-methoxyethoxy)ethoxy)ethyl chloride<sup>9</sup> (14.65 g, 80.2 mmol, 4.4 eq) were added to acetonitrile (40 mL) in a glass pressure ampoule (170 mL). The ampoule was flushed with nitrogen, sealed and the mixture stirred at 100 °C for 72 h, and then for further 7x24 h at 120 °C. The contents were diluted with ether (60 mL) and the clear solvent layer was cannulated off. The residue was washed with ethyl acetate (5 x 60 mL) and ether (60 mL). The residue was taken up in water (80 mL) and stirred with a spoonful of powdered charcoal at 60 °C for 1.5 h. The solution was filtered and passed through a cellulose syringe filter providing a colourless solution. Aqueous lithium bis(trifluoromethanesulfonyl)imide (10.55 g, 36.7 mmol, 2 eq) in a minimal amount of water was added to the filtrate with stirring. The mixture was extracted with ethyl acetate (3 x 10 mL) and the organic phase washed with water until halide-free (3 x 15 mL). The solution was filtered through the hydrophobic filter paper, evaporated *via* rotary evaporation and dried (0.1 mbar, 60 °C, 24 h) to afford a nearly colourless liquid (13.75 g, 86% in two steps).

$\delta_{\text{H}}$  (400 MHz; DMSO-*d*<sub>6</sub>) 3.24 (3 H, s, OCH<sub>3</sub>), 3.40-3.44 (2 H, m, OCH<sub>2</sub>), 3.47-3.53 (4 H, m, OCH<sub>2</sub>), 3.55-3.59 (2 H, m, OCH<sub>2</sub>), 3.77-3.81 (2 H, m, OCH<sub>2</sub>), 3.90 (3 H, s, NCH<sub>3</sub>), 4.38-4.44 (2 H, m, NCH<sub>2</sub>C), 6.65 (2 H, s, NCH<sub>2</sub>N), 7.76-7.79 (1 H, m, -CH=C), 7.82-7.85 (1 H, m, -CH=C), 7.92-7.97 (2 H, m, -CH=C), 9.31-9.34 (1 H, bs, NCHN), 9.36-9.39 (1 H, bs, NCHN) ppm

$\delta_{\text{C}}$  (101 MHz; DMSO-*d*<sub>6</sub>) 36.2, 49.3, 58.0, 58.3, 67.9, 69.5 (2 C), 69.6, 71.2, 119.5 (q, <sup>1</sup>J<sub>13C-19F</sub> 322 Hz), 121.9 (2 C), 123.7, 124.5, 137.8, 138.1 ppm

$\delta_{\text{F}}$  (377 MHz; DMSO-*d*<sub>6</sub>) -78.9 ppm

ATR-FTIR (neat): 3151 (w), 3116 (w), 2926 (w), 2883 (w), 1587 (w), 1569 (w), 1552 (w), 1454 (w),

1346 (s), 1328 (s), 1227 (m), 1173 (vs), 1131 (vs), 1050 (vs), 848 (w), 790 (m), 771 (m), 764 (m), 740 (s), 653 (w)  $\text{cm}^{-1}$

$m/z$  (ES<sup>+</sup>): 155 (100%, [(C<sub>7</sub>O<sub>3</sub>)imC<sub>1</sub>imC<sub>1</sub>]<sup>2+</sup>/2), 309 (40%, [(C<sub>7</sub>O<sub>3</sub>)imC<sub>1</sub>imC<sub>1</sub>]<sup>2+</sup>-H<sup>+</sup>)

$m/z$  (ES<sup>-</sup>): 280 (100%, [NTf<sub>2</sub>]<sup>-</sup>)

Elemental Analysis (expected): C, 26.06 (26.21); H, 2.94 (3.01); N, 9.50 (9.61) %

## Thermal stability of monocationic and dicationic ionic liquids

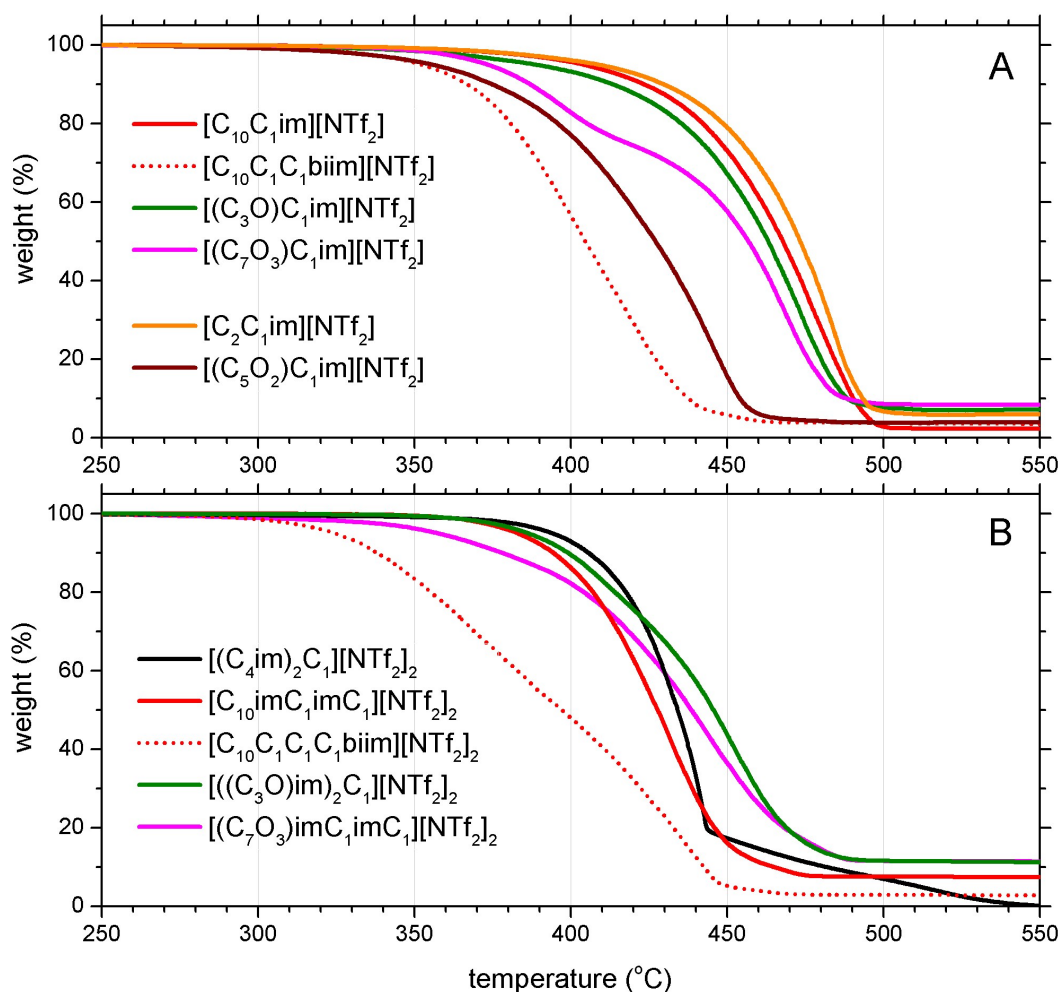

**Figure S1**

Thermal degradation curves of **monocationic (A)** and **dicationic (B)** ionic liquids, measured by temperature ramped TGA. A PerkinElmer Pyris 1 TGA instrument and Pt sample pans were used; heating rate 10 °C min<sup>-1</sup>, and nitrogen carrier gas flow 20 mL min<sup>-1</sup>. IL samples (5-15 mg) were isothermally dried at 70 °C in nitrogen flow for 1 h following a temperature ramp to 600 °C.

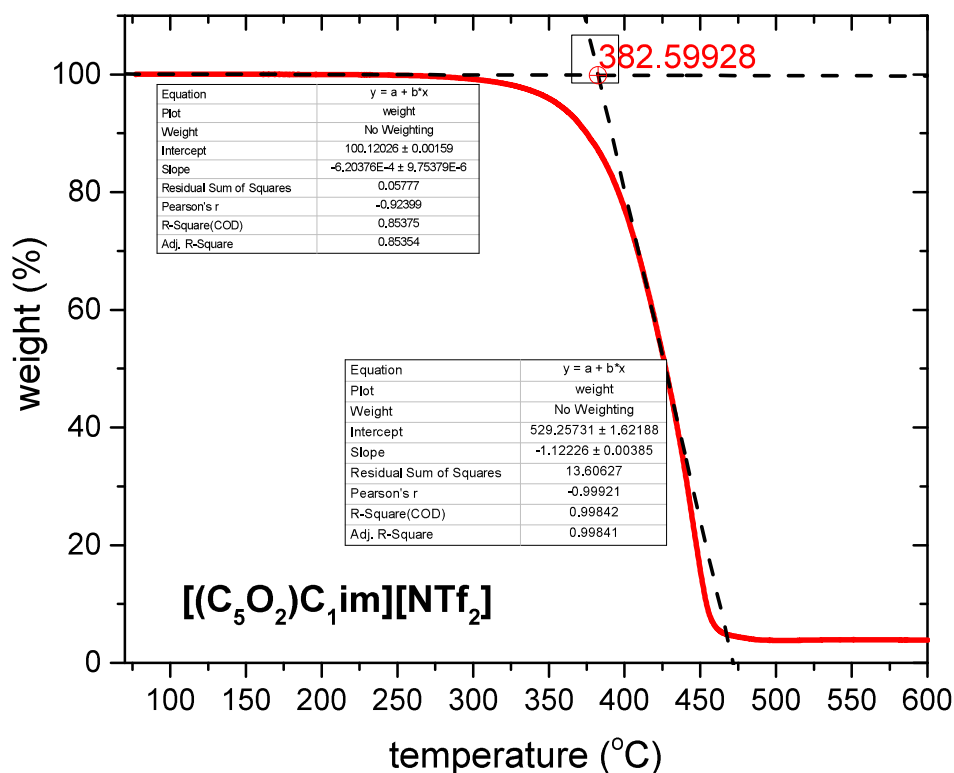

**Figure S2**

Typical example of the  $T_{onset}$  calculation from the intersection of the tangents of the baseline and the first weight loss.

**Table S2**

$T_{onset}$  and corresponding  $T_{0.01/10}$  values

| No | IL                               | Cation charge | $T_{onset}, ^\circ C^a$ | $T_{0.01/10}, ^\circ C^b$ |
|----|----------------------------------|---------------|-------------------------|---------------------------|
| 1  | $[C_{10}C_1im][NTf_2]$           | 1+            | 441                     | 361                       |
| 2  | $[C_{10}C_1C_1biim][NTf_2]$      | 1+            | 368                     | 311                       |
| 3  | $[(C_3O)C_1im][NTf_2]$           | 1+            | 435                     | 357                       |
| 4  | $[(C_7O_3)C_1im][NTf_2]$         | 1+            | 369                     | 303                       |
| 5  | $[C_2C_1im][NTf_2]$              | 1+            | 450                     | 367                       |
| 6  | $[(C_5O_2)C_1im][NTf_2]$         | 1+            | 383                     | 321                       |
| 7  | $[(C_4im)_2C_1][NTf_2]_2$        | 2+            | 411                     | 341                       |
| 8  | $[C_{10}imC_1imC_1][NTf_2]_2$    | 2+            | 400                     | 333                       |
| 9  | $[C_{10}C_1C_1C_1biim][NTf_2]_2$ | 2+            | 329                     | 284                       |
| 10 | $[(C_3Oim)_2C_1][NTf_2]_2$       | 2+            | 387                     | 324                       |
| 11 | $[(C_7O_3)imC_1imC_1][NTf_2]_2$  | 2+            | 341                     | 292                       |

<sup>a</sup> heating rate  $10 \text{ } ^\circ C \text{ min}^{-1}$ ; <sup>b</sup> estimated *via* relation  $T_{0.01/10} = 0.6902T_{onset} + 56.829$  from ref.<sup>13</sup>

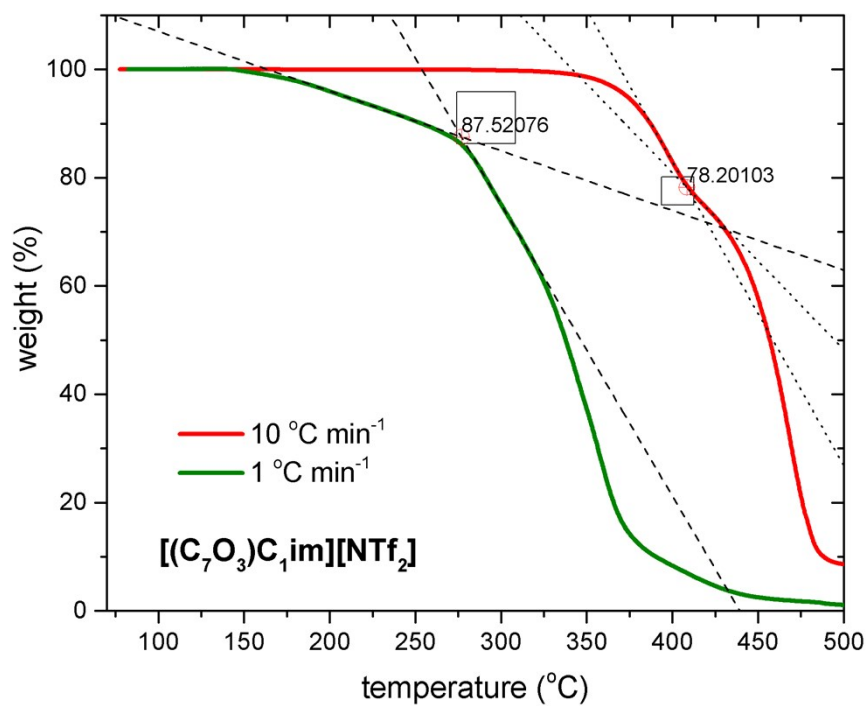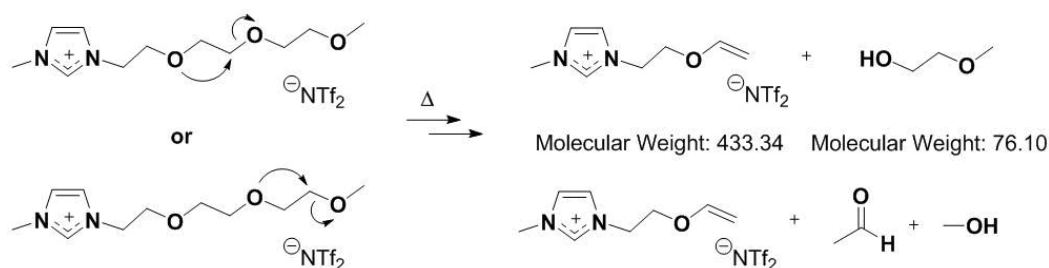

**Figure S3**

Thermal degradation curves of  $[(\text{C}_7\text{O}_3)\text{C}_1\text{im}][\text{NTf}_2]$  at different heating rates. The green curve ( $1\text{ }^\circ\text{C min}^{-1}$ ) shows the first distinct weight loss (approx. 12.5%) what is comparable with the expected for a loss of ethylene glycol monomethylether / acetaldehyde and methanol (14.9%)

## Densities and excess molar volumes

**Table S3**

Pure ionic liquid density data ( $\rho$ ) and the derived molar volumes ( $V_m$ ). Also listed are the molar volumes as calculated from the group contribution method using literature parameters ( $V_m^{GCM}$ ) and a separately fitted parameter for the divalent cation group  $[(C_0imC_1)_2]^{2+}$  ( $V_m^{GCM*}$ ). All parameters and groups are listed in Table S5 and Table S6.

| no      | IL                                                                     | $M_w$               | $T$      | $\rho$             | $V_m$                              | $V_m^{GCM}$                        | $V_m^{GCM*}$                       |
|---------|------------------------------------------------------------------------|---------------------|----------|--------------------|------------------------------------|------------------------------------|------------------------------------|
| IL      |                                                                        | g·mol <sup>-1</sup> | K        | g·cm <sup>-3</sup> | cm <sup>3</sup> ·mol <sup>-1</sup> | cm <sup>3</sup> ·mol <sup>-1</sup> | cm <sup>3</sup> ·mol <sup>-1</sup> |
| 1       | [C <sub>2</sub> C <sub>1</sub> im][NTf <sub>2</sub> ]                  | 391.301             | 293.152  | 1.523736           | 256.8037                           | 257.4570                           |                                    |
|         |                                                                        |                     | 298.151  | 1.518770           | 257.6434                           | 258.0400                           |                                    |
|         |                                                                        |                     | 303.149  | 1.513710           | 258.5046                           | 258.6533                           |                                    |
|         |                                                                        |                     | 313.147  | 1.503658           | 260.2327                           | 259.9711                           |                                    |
|         |                                                                        |                     | 323.149  | 1.493669           | 261.9730                           | 261.4104                           |                                    |
|         |                                                                        |                     | 333.149  | 1.483754           | 263.7236                           | 262.9711                           |                                    |
| 2       | [C <sub>10</sub> C <sub>1</sub> im][NTf <sub>2</sub> ]                 | 503.517             | 298.151  | 1.278697           | 393.7735                           | 393.7760                           |                                    |
|         |                                                                        |                     | 303.148  | 1.274368           | 395.1111                           | 394.4457                           |                                    |
|         |                                                                        |                     | 313.147  | 1.265748           | 397.8016                           | 395.8785                           |                                    |
|         |                                                                        |                     | 313.149  | 1.265749           | 397.8035                           | 395.8785                           |                                    |
|         |                                                                        |                     | 313.150  | 1.265744           | 397.8032                           | 395.8785                           |                                    |
|         |                                                                        |                     | 313.151  | 1.265743           | 397.8019                           | 395.8785                           |                                    |
| 3       | [(C <sub>3</sub> O)C <sub>1</sub> im][NTf <sub>2</sub> ]               | 421.327             | 298.151  | 1.505373           | 279.8821                           | 279.5780                           |                                    |
|         |                                                                        |                     | 303.149  | 1.500272           | 280.8337                           | 280.2082                           |                                    |
|         |                                                                        |                     | 313.149  | 1.490137           | 282.7438                           | 281.5632                           |                                    |
|         |                                                                        |                     | 323.149  | 1.480075           | 284.6660                           | 283.0441                           |                                    |
|         |                                                                        |                     | 333.147  | 1.47009            | 286.5995                           | 284.6510                           |                                    |
|         |                                                                        |                     | 353.148  | 1.450327           | 290.5048                           | 288.2427                           |                                    |
| 4       | [(C <sub>5</sub> O <sub>2</sub> )C <sub>1</sub> im][NTf <sub>2</sub> ] | 465.380             | 298.148  | 1.458482           | 319.0786                           | 318.0830                           |                                    |
|         |                                                                        |                     | 298.151  | 1.458512           | 319.0834                           | 318.0830                           |                                    |
|         |                                                                        |                     | 298.151  | 1.458490           | 319.0852                           | 318.0830                           |                                    |
|         |                                                                        |                     | 303.149  | 1.453560           | 320.1657                           | 318.7372                           |                                    |
|         |                                                                        |                     | 303.149  | 1.453548           | 320.1683                           | 318.7372                           |                                    |
|         |                                                                        |                     | 313.147  | 1.443723           | 322.3472                           | 320.1437                           |                                    |
|         |                                                                        |                     | 313.147  | 1.443710           | 322.3501                           | 320.1437                           |                                    |
|         |                                                                        |                     | 323.149  | 1.433967           | 324.5402                           | 321.6811                           |                                    |
|         |                                                                        |                     | 333.148  | 1.424282           | 326.7450                           | 323.3494                           |                                    |
|         |                                                                        |                     | 333.149  | 1.424291           | 326.7471                           | 323.3494                           |                                    |
| 353.149 | 1.405159                                                               | 331.1938            | 327.0784 |                    |                                    |                                    |                                    |
| 353.149 | 1.405149                                                               | 331.1962            | 327.0784 |                    |                                    |                                    |                                    |



| no      | IL                                                                                                   | $M_w$               | $T$      | $\rho$             | $V_m$                              | $V_m^{GCM}$                        | $V_m^{GCM*}$                       |
|---------|------------------------------------------------------------------------------------------------------|---------------------|----------|--------------------|------------------------------------|------------------------------------|------------------------------------|
| IL      |                                                                                                      | g·mol <sup>-1</sup> | K        | g·cm <sup>-3</sup> | cm <sup>3</sup> ·mol <sup>-1</sup> | cm <sup>3</sup> ·mol <sup>-1</sup> | cm <sup>3</sup> ·mol <sup>-1</sup> |
| 5       | [(C <sub>7</sub> O <sub>3</sub> )C <sub>1</sub> im][NTf <sub>2</sub> ]                               | 509.433             | 298.150  | 1.426309           | 357.1687                           | 356.5880                           |                                    |
|         |                                                                                                      |                     | 298.150  | 1.426230           | 357.1885                           | 356.5880                           |                                    |
|         |                                                                                                      |                     | 303.148  | 1.421400           | 358.3819                           | 357.2661                           |                                    |
|         |                                                                                                      |                     | 303.149  | 1.421481           | 358.4023                           | 357.2661                           |                                    |
|         |                                                                                                      |                     | 313.149  | 1.411893           | 360.8156                           | 358.7242                           |                                    |
|         |                                                                                                      |                     | 313.149  | 1.411877           | 360.8225                           | 358.7242                           |                                    |
|         |                                                                                                      |                     | 313.149  | 1.411812           | 360.8197                           | 358.7242                           |                                    |
|         |                                                                                                      |                     | 313.151  | 1.411866           | 360.8363                           | 358.7242                           |                                    |
|         |                                                                                                      |                     | 323.149  | 1.402387           | 363.2614                           | 360.3181                           |                                    |
|         |                                                                                                      |                     | 323.149  | 1.402309           | 363.2816                           | 360.3181                           |                                    |
|         |                                                                                                      |                     | 333.148  | 1.392959           | 365.7200                           | 362.0477                           |                                    |
|         |                                                                                                      |                     | 333.149  | 1.392882           | 365.7402                           | 362.0477                           |                                    |
|         |                                                                                                      |                     | 353.147  | 1.374304           | 370.6844                           | 365.9141                           |                                    |
|         |                                                                                                      |                     | 353.149  | 1.374240           | 370.7016                           | 365.9141                           |                                    |
| 6       | [C <sub>10</sub> imC <sub>1</sub> imC <sub>1</sub> ][NTf <sub>2</sub> ] <sub>2</sub>                 | 864.748             | 298.150  | 1.462698           | 591.2043                           | 617.8820                           | 591.200292                         |
|         |                                                                                                      |                     | 298.151  | 1.462689           | 591.2006                           | 617.8820                           | 591.200292                         |
|         |                                                                                                      |                     | 303.149  | 1.458131           | 593.0588                           | 619.1509                           | 593.055379                         |
|         |                                                                                                      |                     | 303.151  | 1.458115           | 593.0523                           | 619.1509                           | 593.055379                         |
|         |                                                                                                      |                     | 313.147  | 1.449061           | 596.7644                           | 621.8728                           | 596.772305                         |
|         |                                                                                                      |                     | 323.149  | 1.440071           | 600.4898                           | 624.8399                           | 600.498233                         |
|         |                                                                                                      |                     | 333.149  | 1.431113           | 604.2486                           | 628.0522                           | 604.233162                         |
|         |                                                                                                      |                     | 353.149  | 1.413614           | 611.7285                           | 635.2126                           | 611.730024                         |
|         |                                                                                                      |                     | 353.149  | 1.413616           | 611.7277                           | 635.2126                           | 611.730024                         |
| 7       | [(C <sub>7</sub> O <sub>3</sub> )imC <sub>1</sub> imC <sub>1</sub> ][NTf <sub>2</sub> ] <sub>2</sub> | 870.664             | 293.151  | 1.608784           | 541.1938                           | 579.4807                           | 552.153802                         |
|         |                                                                                                      |                     | 298.149  | 1.603837           | 542.9552                           | 580.6940                           | 554.012292                         |
|         |                                                                                                      |                     | 298.150  | 1.603565           | 542.8631                           | 580.6940                           | 554.012292                         |
|         |                                                                                                      |                     | 303.149  | 1.598904           | 544.5380                           | 581.9714                           | 555.875827                         |
|         |                                                                                                      |                     | 313.149  | 1.589141           | 547.8834                           | 584.7185                           | 559.618033                         |
|         |                                                                                                      |                     | 323.148  | 1.579504           | 551.2262                           | 587.7221                           | 563.380422                         |
|         |                                                                                                      |                     | 333.149  | 1.569924           | 554.5899                           | 590.9820                           | 567.162992                         |
|         |                                                                                                      |                     | 353.148  | 1.551307           | 561.2455                           | 598.2713                           | 574.788678                         |
| 9       | [((C <sub>3</sub> O)im) <sub>2</sub> C <sub>1</sub> ][NTf <sub>2</sub> ] <sub>2</sub>                | 826.611             | 293.151  | 1.602748           | 515.7461                           | 540.9984                           | 513.671526                         |
|         |                                                                                                      |                     | 298.149  | 1.597723           | 517.3682                           | 542.1890                           | 515.507292                         |
|         |                                                                                                      |                     | 303.148  | 1.592722           | 518.9926                           | 543.4424                           | 517.34688                          |
|         |                                                                                                      |                     | 311.151  | 1.584828           | 521.5777                           | 545.5788                           | 520.298171                         |
|         |                                                                                                      |                     | 313.147  | 1.582790           | 522.2493                           | 546.1380                           | 521.037522                         |
|         |                                                                                                      |                     | 313.147  | 1.582910           | 522.2097                           | 546.1380                           | 521.037522                         |
|         |                                                                                                      |                     | 313.149  | 1.582860           | 522.2262                           | 546.1380                           | 521.037522                         |
|         |                                                                                                      |                     | 323.149  | 1.572917           | 525.5274                           | 549.0851                           | 524.743452                         |
|         |                                                                                                      |                     | 323.149  | 1.573059           | 525.4800                           | 549.0851                           | 524.743452                         |
| 323.149 | 1.572991                                                                                             | 525.5027            | 549.0851 | 524.743452         |                                    |                                    |                                    |

| no | IL                                                                                                  | $M_w$               | $T$     | $\rho$             | $V_m$                              | $V_m^{GCM}$                        | $V_m^{GCM*}$                       |
|----|-----------------------------------------------------------------------------------------------------|---------------------|---------|--------------------|------------------------------------|------------------------------------|------------------------------------|
| IL |                                                                                                     | g·mol <sup>-1</sup> | K       | g·cm <sup>-3</sup> | cm <sup>3</sup> ·mol <sup>-1</sup> | cm <sup>3</sup> ·mol <sup>-1</sup> | cm <sup>3</sup> ·mol <sup>-1</sup> |
|    |                                                                                                     |                     | 333.148 | 1.563390           | 528.7772                           | 552.2837                           | 528.464669                         |
|    |                                                                                                     |                     | 333.149 | 1.563250           | 528.7299                           | 552.2837                           | 528.464669                         |
|    |                                                                                                     |                     | 333.149 | 1.563320           | 528.7536                           | 552.2837                           | 528.464669                         |
|    |                                                                                                     |                     | 353.149 | 1.544064           | 535.3476                           | 559.4356                           | 535.952965                         |
|    |                                                                                                     |                     | 353.149 | 1.544207           | 535.2981                           | 559.4356                           | 535.952965                         |
|    |                                                                                                     |                     | 353.149 | 1.544133           | 535.3237                           | 559.4356                           | 535.952965                         |
| 10 | [C <sub>10</sub> C <sub>1</sub> C <sub>1</sub> C <sub>1</sub> biim][NTf <sub>2</sub> ] <sub>2</sub> | 878.775             | 338.151 | 1.420820           | 618.4985                           | 646.7764                           | 623.130076                         |
|    |                                                                                                     |                     | 338.152 | 1.420837           | 618.4911                           | 646.7764                           | 623.130076                         |
|    |                                                                                                     |                     | 343.151 | 1.416627           | 620.3291                           | 648.5437                           | 625.010988                         |
|    |                                                                                                     |                     | 343.151 | 1.416645           | 620.3213                           | 648.5437                           | 625.010988                         |
|    |                                                                                                     |                     | 353.151 | 1.408457           | 623.9337                           | 652.2625                           | 628.779856                         |
|    |                                                                                                     |                     | 353.152 | 1.408443           | 623.9275                           | 652.2625                           | 628.779856                         |
|    |                                                                                                     |                     | 363.151 | 1.400321           | 627.5597                           | 656.2269                           | 632.558115                         |
|    |                                                                                                     |                     | 363.151 | 1.400305           | 627.5525                           | 656.2269                           | 632.558115                         |
| 11 | [C <sub>10</sub> C <sub>1</sub> C <sub>1</sub> biim][NTf <sub>2</sub> ]                             | 583.607             | 313.147 | 1.276920           | 457.0427                           | 462.6992                           |                                    |
|    |                                                                                                     |                     | 313.147 | 1.276916           | 457.0442                           | 462.6992                           |                                    |
|    |                                                                                                     |                     | 333.147 | 1.259882           | 463.2221                           | 466.7411                           |                                    |
|    |                                                                                                     |                     | 333.148 | 1.259886           | 463.2235                           | 466.7411                           |                                    |
|    |                                                                                                     |                     | 353.148 | 1.243073           | 469.4873                           | 471.7237                           |                                    |
|    |                                                                                                     |                     | 353.148 | 1.243066           | 469.4900                           | 471.7237                           |                                    |

**Table S4**

Fitting parameters of the second order polynomial ( $V_m = p_0 + p_1T + p_2T^2$ ) used for the interpolation of the pure ionic liquid (IL) molar volumes ( $V_m$ ) studied at atmospheric pressure as a function of temperature ( $T$ ) within temperature range  $T_{\text{range}}$ . IL numbers correspond to table 1 of the manuscript, AAD is the absolute average deviation  $\sum |V_m - V_m^{fit}|/n$ .

| no | IL                                                                                                   | $T_{\text{range}}$ | $p_0$                              | $p_1$                                               | $p_2 \cdot 10^3$                                    | AAD $\cdot 10^6$                   |
|----|------------------------------------------------------------------------------------------------------|--------------------|------------------------------------|-----------------------------------------------------|-----------------------------------------------------|------------------------------------|
| IL |                                                                                                      | K                  | cm <sup>3</sup> ·mol <sup>-1</sup> | cm <sup>3</sup> ·mol <sup>-1</sup> ·K <sup>-1</sup> | cm <sup>3</sup> ·mol <sup>-1</sup> ·K <sup>-2</sup> | cm <sup>3</sup> ·mol <sup>-1</sup> |
| 1  | [C <sub>2</sub> Clim][NTf <sub>2</sub> ]                                                             | 293.15–353.15      | 211.977                            | 0.135079                                            | 60.7384                                             | 3.90362                            |
| 2  | [C <sub>10</sub> C <sub>1</sub> im][NTf <sub>2</sub> ]                                               | 298.15–353.15      | 322.531                            | 0.210832                                            | 94.3142                                             | 1.02245                            |
| 3  | [(C <sub>3</sub> O)C <sub>1</sub> im][NTf <sub>2</sub> ]                                             | 298.15–353.15      | 228.590                            | 0.154222                                            | 59.7489                                             | 0.356482                           |
| 4  | [(C <sub>3</sub> O <sub>2</sub> )C <sub>1</sub> im][NTf <sub>2</sub> ]                               | 298.15–353.15      | 260.061                            | 0.179155                                            | 63.0686                                             | 1.51649                            |
| 5  | [(C <sub>7</sub> O <sub>3</sub> )C <sub>1</sub> im][NTf <sub>2</sub> ]                               | 298.15–353.15      | 291.131                            | 0.201120                                            | 68.4430                                             | 8.86676                            |
| 6  | [C <sub>10</sub> imC <sub>1</sub> imC <sub>1</sub> ][NTf <sub>2</sub> ] <sub>2</sub>                 | 298.15–353.15      | 484.668                            | 0.343837                                            | 45.1881                                             | 5.15451                            |
| 7  | [(C <sub>7</sub> O <sub>3</sub> )imC <sub>1</sub> imC <sub>1</sub> ][NTf <sub>2</sub> ] <sub>2</sub> | 293.15–353.15      | 443.061                            | 0.335603                                            | -2.64144                                            | 21.5239                            |
| 9  | [[(C <sub>3</sub> O)im] <sub>2</sub> C <sub>1</sub> ][NTf <sub>2</sub> ] <sub>2</sub>                | 293.15–353.15      | 425.024                            | 0.295557                                            | 47.4879                                             | 14.1575                            |
| 10 | [C <sub>10</sub> C <sub>1</sub> C <sub>1</sub> C <sub>1</sub> biim][NTf <sub>2</sub> ] <sub>2</sub>  | 338.15–363.15      | 491.882                            | 0.385899                                            | -33.8766                                            | 6.75149                            |
| 11 | [C <sub>10</sub> C <sub>1</sub> C <sub>1</sub> biim][NTf <sub>2</sub> ]                              | 313.15–353.15      | 371.566                            | 0.239113                                            | 108.084                                             | 0.924364                           |

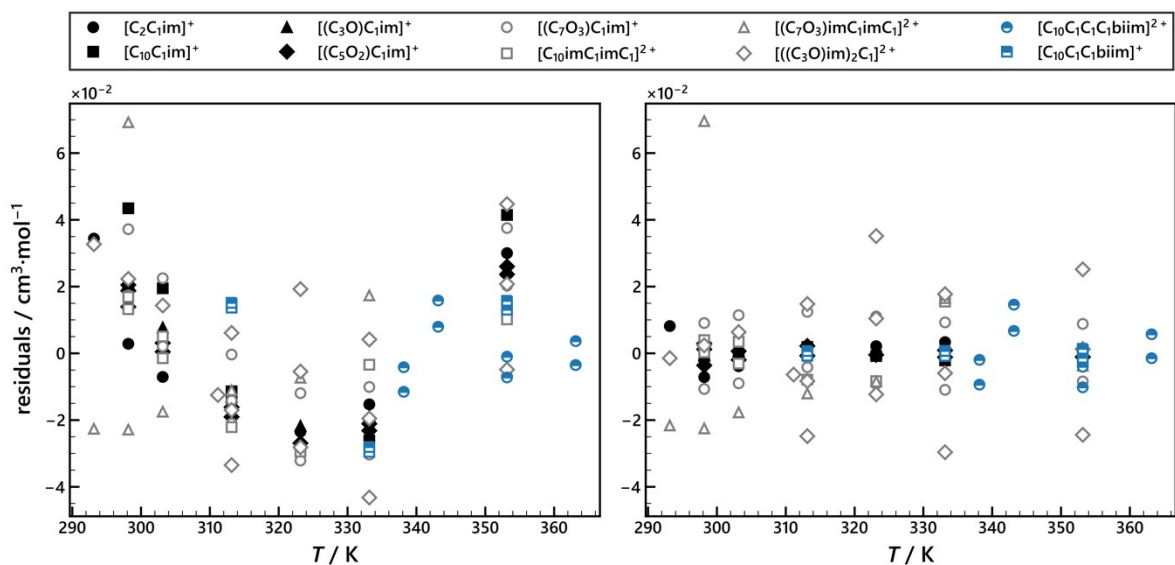

**Figure S4**

Residual plots of the temperature ( $T$ ) versus density ( $\rho$ ) fits using a first order ( $\rho = p_0 + p_1T$ , left) or second order ( $\rho = p_0 + p_1T + p_2T^2$ , right) polynomial.

**Table S5**

Group contribution parameters used to calculate the molar volume using equation.

| Group $j$                                                        | $C_0$<br>$\text{cm}^3 \cdot \text{mol}^{-1}$ | $C_1$<br>$\text{cm}^3 \cdot \text{mol}^{-1} \cdot \text{K}^{-1}$ | $C_2$<br>$\text{cm}^3 \cdot \text{mol}^{-1} \cdot \text{K}^{-2}$ | Ref       |
|------------------------------------------------------------------|----------------------------------------------|------------------------------------------------------------------|------------------------------------------------------------------|-----------|
| CH <sub>2</sub>                                                  | 16.967                                       | 0.001399                                                         | 0.000001946                                                      | 14        |
| O                                                                | 4.571                                        | 0.001869                                                         | 0.00002058                                                       | 15        |
| [NTf <sub>2</sub> ] <sup>-</sup>                                 | 157.597                                      | 0.104348374                                                      | 5.05171E-05                                                      | 14        |
| [C <sub>0</sub> imC <sub>1</sub> ] <sup>+</sup>                  | 66.509                                       | 0.012485755                                                      | 0.000552882                                                      | 14        |
| [(C <sub>0</sub> imC <sub>1</sub> ) <sub>2</sub> ] <sup>2+</sup> | 106.336                                      | 0.14810570577647800                                              | -7.54867746938373E-05                                            | This work |

**Table S6**

Number of groups ( $n_j$ ) taken into account for the calculation of the molar volume of the studied ILs using the group contribution method (eq. 1 main text). For the divalent ILs, either two imidazolium groups ( $C_0C_1im$ ) or one divalent cation group ( $[(C_0imC_1)_2]^{2+}$ ) were taken into account.

| no | IL                               | $n_j$ |            |                       |        |    |         |   |
|----|----------------------------------|-------|------------|-----------------------|--------|----|---------|---|
|    |                                  | $j =$ | $C_0imC_1$ | $[(C_0imC_1)_2]^{2+}$ | $CH_2$ | O  | $NTf_2$ |   |
| 1  | $[C_2C_1im][NTf_2]$              |       | 1          | 0                     | 2      | 0  | 1       |   |
| 2  | $[C_{10}C_1im][NTf_2]$           |       | 1          | 0                     | 10     | 0  | 1       |   |
| 3  | $[(C_3O)C_1im][NTf_2]$           |       | 1          | 0                     | 3      | 1  | 1       |   |
| 4  | $[(C_5O_2)C_1im][NTf_2]$         |       | 1          | 0                     | 5      | 2  | 1       |   |
| 5  | $[(C_7O_3)C_1im][NTf_2]$         |       | 1          | 0                     | 7      | 3  | 1       |   |
| 6  | $[C_{10}imC_1imC_1][NTf_2]_2$    | 2     | 0          | 0                     | 1      | 10 | 0       | 2 |
| 7  | $[(C_7O_3)imC_1imC_1][NTf_2]_2$  | 2     | 0          | 0                     | 1      | 7  | 3       | 2 |
| 9  | $[((C_3O)im)_2C_1][NTf_2]_2$     | 2     | 0          | 0                     | 1      | 5  | 2       | 2 |
| 10 | $[C_{10}C_1C_1C_1biim][NTf_2]_2$ | 2     | 0          | 0                     | 1      | 11 | 0       | 2 |
| 11 | $[C_{10}C_1C_1biim][NTf_2]$      |       | 2          | 0                     | 10     | 0  | 1       |   |

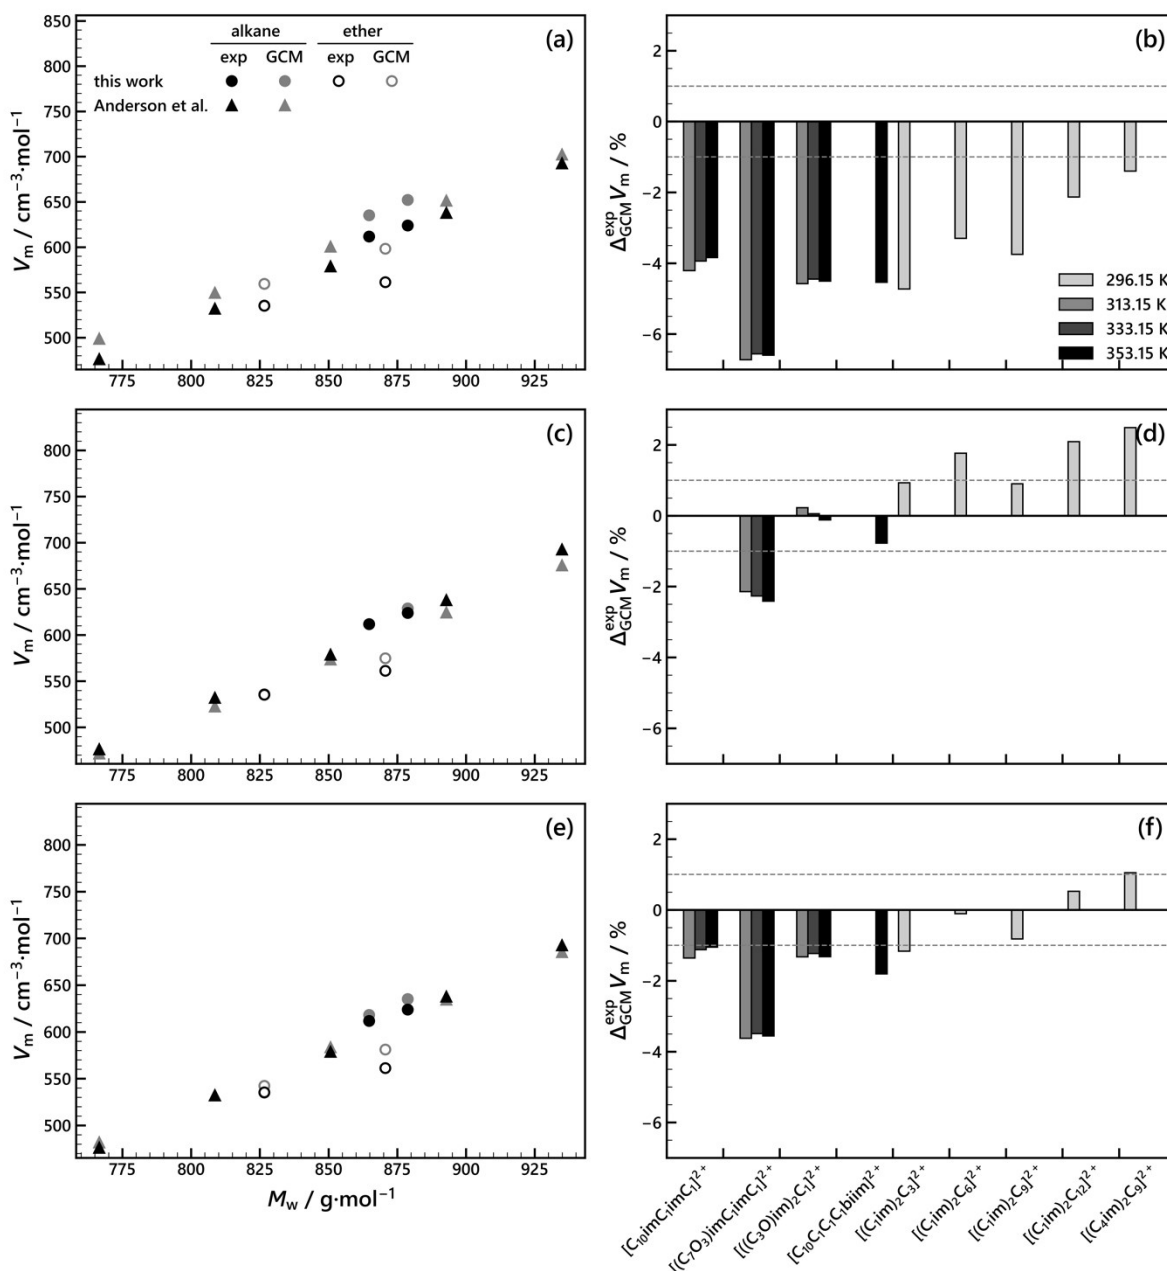

**Figure S5**

(a), (c), and (e): Molar volume ( $V_m$ ) as function of molar mass ( $M_w$ ) of divalent imidazolium bistriflimide ionic liquids at 353.15 K (this work) or 296.15 K (Anderson et al.<sup>5</sup>) calculated from the experimental density data (exp) and described/predicted using the group contribution method (GCM). The nature of the imidazolium side-chain (aliphatic/ether) is also distinguished. (b), (d), and (f):

Relative difference between the experimental and calculated molar volume using the GCM ( $\Delta_{GCM}^{exp} V_m$ ) at different temperatures. The top panels—(a) and (b)—show the GCM calculations based on Table S6 by representing the divalent cations with two  $\text{C}_0\text{C}_1\text{im}$  groups. For the middle panels—(c) and (d)—new GCM parameters were taken into account for the doubly charged diimidazolium head-group based on  $[\text{C}_{10}\text{imC}_1\text{imC}_1][\text{NTf}_2]_2$ . The bottom panels—(e) and (f)—are calculated using  $n_{\text{CH}_2} - 1$  as compared to the top panels.

**Table S7**

Excess molar volumes ( $V_m^E = V_m^{id} - V_m$ ) of the studied binary ionic liquid (IL) mixtures at various mole fractions ( $x_{IL2}$ ) temperatures ( $T$ ), where  $V_m^{id} = (1 - x_{IL2})V_{m,IL1} + x_{IL2}V_{m,IL2}$  with  $V_{m,ILi}$  being the molar volume of pure IL  $i$  determined from the temperature interpolation presented in Table S4 and  $V_m = [(1 - x_{IL2})M_{w,IL1} + x_{IL2}M_{w,IL2}]/\rho$  where  $\rho$  is the experimental density of the mixture.

| IL1                                                                                  | IL2                                                       | $x_{IL2}$ | $T$<br>K | $\rho$<br>g·cm <sup>-3</sup> | $V_{m,IL1}$<br>cm <sup>3</sup> ·mol <sup>-1</sup> | $V_{m,IL2}$<br>cm <sup>3</sup> ·mol <sup>-1</sup> | $V_m^{id}$<br>cm <sup>3</sup> ·mol <sup>-1</sup> | $V_m$<br>cm <sup>3</sup> ·mol <sup>-1</sup> | $V_m^E$<br>cm <sup>3</sup> ·mol <sup>-1</sup> |
|--------------------------------------------------------------------------------------|-----------------------------------------------------------|-----------|----------|------------------------------|---------------------------------------------------|---------------------------------------------------|--------------------------------------------------|---------------------------------------------|-----------------------------------------------|
| [[C <sub>3</sub> O]im) <sub>2</sub> C <sub>1</sub> ][NTf <sub>2</sub> ] <sub>2</sub> | [C <sub>10</sub> C <sub>1</sub> im][NTf <sub>2</sub> ]    | 0.2189    | 298.151  | 1.538482                     | 517.4290                                          | 393.8154                                          | 490.3754                                         | 491.3284                                    | 0.9530                                        |
|                                                                                      |                                                           |           | 303.150  | 1.533575                     | 519.0115                                          | 395.1309                                          | 491.8994                                         | 492.9005                                    | 1.0011                                        |
|                                                                                      |                                                           |           | 313.147  | 1.523733                     | 522.2052                                          | 397.7883                                          | 494.9758                                         | 496.0842                                    | 1.1084                                        |
|                                                                                      |                                                           |           | 313.151  | 1.523798                     | 522.2065                                          | 397.7893                                          | 494.9770                                         | 496.0630                                    | 1.0860                                        |
|                                                                                      |                                                           |           | 323.149  | 1.514202                     | 525.4402                                          | 400.4829                                          | 498.0925                                         | 499.2068                                    | 1.1143                                        |
|                                                                                      |                                                           | 0.4973    | 298.151  | 1.45733                      | 517.4290                                          | 393.8154                                          | 455.9570                                         | 456.9583                                    | 1.0013                                        |
|                                                                                      |                                                           |           | 298.151  | 1.457337                     | 517.4290                                          | 393.8154                                          | 455.9570                                         | 456.9561                                    | 0.9991                                        |
|                                                                                      |                                                           |           | 303.150  | 1.45261                      | 519.0115                                          | 395.1309                                          | 457.4067                                         | 458.4431                                    | 1.0364                                        |
|                                                                                      |                                                           |           | 303.152  | 1.452596                     | 519.0121                                          | 395.1315                                          | 457.4073                                         | 458.4475                                    | 1.0402                                        |
|                                                                                      |                                                           |           | 313.147  | 1.443229                     | 522.2052                                          | 397.7883                                          | 460.3337                                         | 461.4230                                    | 1.0893                                        |
|                                                                                      |                                                           | 0.7006    | 313.149  | 1.443116                     | 522.2059                                          | 397.7888                                          | 460.3343                                         | 461.4591                                    | 1.1248                                        |
|                                                                                      |                                                           |           | 313.151  | 1.443213                     | 522.2065                                          | 397.7893                                          | 460.3349                                         | 461.4281                                    | 1.0932                                        |
|                                                                                      |                                                           |           | 323.149  | 1.433827                     | 525.4402                                          | 400.4829                                          | 463.3000                                         | 464.4487                                    | 1.1487                                        |
|                                                                                      |                                                           |           | 333.149  | 1.424552                     | 528.7148                                          | 403.2138                                          | 466.3042                                         | 467.4726                                    | 1.1684                                        |
|                                                                                      |                                                           |           | 353.149  | 1.40621                      | 535.3880                                          | 408.7888                                          | 472.4313                                         | 473.5701                                    | 1.1388                                        |
|                                                                                      |                                                           |           | 293.151  | 1.395617                     | 515.8559                                          | 392.5084                                          | 429.4332                                         | 430.0873                                    | 0.6541                                        |
|                                                                                      |                                                           |           | 298.151  | 1.391044                     | 517.4290                                          | 393.8154                                          | 430.8199                                         | 431.5012                                    | 0.6813                                        |
|                                                                                      |                                                           |           | 303.148  | 1.386463                     | 519.0108                                          | 395.1304                                          | 432.2148                                         | 432.9269                                    | 0.7121                                        |
|                                                                                      |                                                           |           | 313.147  | 1.37731                      | 522.2052                                          | 397.7883                                          | 435.0332                                         | 435.8039                                    | 0.7707                                        |
|                                                                                      |                                                           |           | 323.149  | 1.3682                       | 525.4402                                          | 400.4829                                          | 437.8896                                         | 438.7057                                    | 0.8161                                        |
| [[C <sub>3</sub> O]im) <sub>2</sub> C <sub>1</sub> ][NTf <sub>2</sub> ] <sub>2</sub> | [(C <sub>7</sub> O <sub>3</sub> )Clim][NTf <sub>2</sub> ] | 0.2008    | 298.150  | 1.57277                      | 517.4287                                          | 357.2181                                          | 485.2531                                         | 485.0748                                    | -0.1783                                       |
|                                                                                      |                                                           |           | 303.150  | 1.567778                     | 519.0115                                          | 358.4061                                          | 486.7565                                         | 486.6193                                    | -0.1372                                       |
|                                                                                      |                                                           |           | 313.150  | 1.557834                     | 522.2062                                          | 360.8059                                          | 489.7916                                         | 489.7255                                    | -0.0661                                       |
|                                                                                      |                                                           |           | 323.148  | 1.548123                     | 525.4398                                          | 363.2375                                          | 492.8642                                         | 492.7974                                    | -0.0668                                       |
|                                                                                      |                                                           |           | 333.149  | 1.538435                     | 528.7148                                          | 365.7029                                          | 495.9766                                         | 495.9007                                    | -0.0758                                       |
|                                                                                      |                                                           | 0.5099    | 353.149  | 1.519251                     | 535.3880                                          | 370.7350                                          | 502.3202                                         | 502.1626                                    | -0.1576                                       |
|                                                                                      |                                                           |           | 298.150  | 1.526658                     | 517.4287                                          | 357.2181                                          | 435.7430                                         | 435.5220                                    | -0.2210                                       |
|                                                                                      |                                                           |           | 298.150  | 1.526626                     | 517.4287                                          | 357.2181                                          | 435.7430                                         | 435.5311                                    | -0.2119                                       |
|                                                                                      |                                                           |           | 298.152  | 1.526637                     | 517.4293                                          | 357.2186                                          | 435.7436                                         | 435.5280                                    | -0.2155                                       |
|                                                                                      |                                                           |           | 298.152  | 1.526612                     | 517.4293                                          | 357.2186                                          | 435.7436                                         | 435.5351                                    | -0.2084                                       |
|                                                                                      |                                                           |           | 303.147  | 1.521701                     | 519.0105                                          | 358.4054                                          | 437.1236                                         | 436.9408                                    | -0.1829                                       |
|                                                                                      |                                                           |           | 303.149  | 1.521737                     | 519.0111                                          | 358.4058                                          | 437.1242                                         | 436.9304                                    | -0.1938                                       |
|                                                                                      |                                                           |           | 313.149  | 1.511976                     | 522.2059                                          | 360.8056                                          | 439.9136                                         | 439.7511                                    | -0.1625                                       |
|                                                                                      |                                                           |           | 313.149  | 1.511938                     | 522.2059                                          | 360.8056                                          | 439.9136                                         | 439.7622                                    | -0.1514                                       |

| IL1                                                                                   | IL2                                                                    | $x_{iL2}$ | $T$<br>K | $\rho$<br>g·cm <sup>-3</sup> | $V_{m,IL1}$<br>cm <sup>3</sup> ·mol <sup>-1</sup> | $V_{m,IL2}$<br>cm <sup>3</sup> ·mol <sup>-1</sup> | $V_m^{id}$<br>cm <sup>3</sup> ·mol <sup>-1</sup> | $V_m$<br>cm <sup>3</sup> ·mol <sup>-1</sup> | $V_m^E$<br>cm <sup>3</sup> ·mol <sup>-1</sup> |
|---------------------------------------------------------------------------------------|------------------------------------------------------------------------|-----------|----------|------------------------------|---------------------------------------------------|---------------------------------------------------|--------------------------------------------------|---------------------------------------------|-----------------------------------------------|
|                                                                                       |                                                                        |           | 323.148  | 1.502222                     | 525.4398                                          | 363.2375                                          | 442.7386                                         | 442.6065                                    | -0.1322                                       |
|                                                                                       |                                                                        |           | 333.149  | 1.492542                     | 528.7148                                          | 365.7029                                          | 445.6008                                         | 445.4770                                    | -0.1238                                       |
|                                                                                       |                                                                        |           | 353.149  | 1.473464                     | 535.3880                                          | 370.7350                                          | 451.4373                                         | 451.2449                                    | -0.1923                                       |
|                                                                                       |                                                                        | 0.7966    | 298.149  | 1.473073                     | 517.4284                                          | 357.2179                                          | 389.8014                                         | 389.6213                                    | -0.1802                                       |
|                                                                                       |                                                                        |           | 303.151  | 1.468143                     | 519.0118                                          | 358.4063                                          | 391.0702                                         | 390.9296                                    | -0.1406                                       |
|                                                                                       |                                                                        |           | 313.147  | 1.458425                     | 522.2052                                          | 360.8051                                          | 393.6306                                         | 393.5345                                    | -0.0961                                       |
|                                                                                       |                                                                        |           | 333.149  | 1.43922                      | 528.7148                                          | 365.7029                                          | 398.8562                                         | 398.7858                                    | -0.0704                                       |
|                                                                                       |                                                                        |           | 353.149  | 1.420337                     | 535.3880                                          | 370.7350                                          | 404.2221                                         | 404.0876                                    | -0.1345                                       |
| (((C <sub>3</sub> O)im) <sub>2</sub> C <sub>1</sub> )[NTf <sub>2</sub> ] <sub>2</sub> | [(C <sub>3</sub> O <sub>2</sub> )C <sub>1</sub> im][NTf <sub>2</sub> ] | 0.2010    | 308.151  | 1.569249                     | 520.6042                                          | 321.2436                                          | 480.5257                                         | 480.4788                                    | -0.0470                                       |
|                                                                                       |                                                                        |           | 323.149  | 1.55449                      | 525.4402                                          | 324.5045                                          | 485.0450                                         | 485.0406                                    | -0.0044                                       |
|                                                                                       |                                                                        |           | 323.150  | 1.554488                     | 525.4405                                          | 324.5047                                          | 485.0453                                         | 485.0413                                    | -0.0040                                       |
|                                                                                       |                                                                        |           | 323.150  | 1.554487                     | 525.4405                                          | 324.5047                                          | 485.0453                                         | 485.0416                                    | -0.0037                                       |
|                                                                                       |                                                                        |           | 323.150  | 1.554485                     | 525.4405                                          | 324.5047                                          | 485.0453                                         | 485.0422                                    | -0.0031                                       |
|                                                                                       |                                                                        |           | 333.149  | 1.544755                     | 528.7148                                          | 326.7157                                          | 488.1058                                         | 488.0973                                    | -0.0085                                       |
|                                                                                       |                                                                        |           | 353.149  | 1.525508                     | 535.3880                                          | 331.2298                                          | 494.3450                                         | 494.2556                                    | -0.0894                                       |
|                                                                                       |                                                                        | 0.4994    | 313.149  | 1.530315                     | 522.2059                                          | 322.3230                                          | 422.3762                                         | 422.2644                                    | -0.1118                                       |
|                                                                                       |                                                                        |           | 313.149  | 1.53023                      | 522.2059                                          | 322.3230                                          | 422.3762                                         | 422.2878                                    | -0.0884                                       |
|                                                                                       |                                                                        |           | 323.148  | 1.520368                     | 525.4398                                          | 324.5043                                          | 425.0844                                         | 425.0270                                    | -0.0574                                       |
|                                                                                       |                                                                        |           | 323.149  | 1.520451                     | 525.4402                                          | 324.5045                                          | 425.0847                                         | 425.0038                                    | -0.0809                                       |
|                                                                                       |                                                                        |           | 333.147  | 1.510593                     | 528.7141                                          | 326.7153                                          | 427.8276                                         | 427.7774                                    | -0.0503                                       |
|                                                                                       |                                                                        |           | 333.148  | 1.510675                     | 528.7145                                          | 326.7155                                          | 427.8279                                         | 427.7541                                    | -0.0738                                       |
|                                                                                       |                                                                        |           | 353.149  | 1.491423                     | 535.3880                                          | 331.2298                                          | 433.4231                                         | 433.2758                                    | -0.1473                                       |
|                                                                                       |                                                                        | 0.7994    | 303.151  | 1.494062                     | 519.0118                                          | 320.1710                                          | 360.0513                                         | 359.9783                                    | -0.0730                                       |
|                                                                                       |                                                                        |           | 313.149  | 1.484163                     | 522.2059                                          | 322.3230                                          | 362.4123                                         | 362.3793                                    | -0.0330                                       |
|                                                                                       |                                                                        |           | 333.149  | 1.464618                     | 528.7148                                          | 326.7157                                          | 367.2295                                         | 367.2152                                    | -0.0143                                       |
|                                                                                       |                                                                        |           | 343.148  | 1.454973                     | 532.0301                                          | 328.9571                                          | 369.6862                                         | 369.6494                                    | -0.0368                                       |
|                                                                                       |                                                                        |           | 353.149  | 1.445404                     | 535.3880                                          | 331.2298                                          | 372.1766                                         | 372.0966                                    | -0.0800                                       |
| (((C <sub>3</sub> O)im) <sub>2</sub> C <sub>1</sub> )[NTf <sub>2</sub> ] <sub>2</sub> | [(C <sub>3</sub> O)C <sub>1</sub> im][NTf <sub>2</sub> ]               | 0.2042    | 313.151  | 1.571488                     | 522.2065                                          | 282.7283                                          | 473.2938                                         | 473.3304                                    | 0.0365                                        |
|                                                                                       |                                                                        |           | 323.149  | 1.561689                     | 525.4402                                          | 284.6401                                          | 476.2575                                         | 476.3003                                    | 0.0428                                        |
|                                                                                       |                                                                        |           | 333.149  | 1.551937                     | 528.7148                                          | 286.5784                                          | 479.2592                                         | 479.2933                                    | 0.0341                                        |
|                                                                                       |                                                                        |           | 353.149  | 1.53264                      | 535.3880                                          | 290.5351                                          | 485.3775                                         | 485.3279                                    | -0.0496                                       |
|                                                                                       |                                                                        | 0.4980    | 293.151  | 1.570207                     | 515.8559                                          | 278.9800                                          | 397.8967                                         | 397.9018                                    | 0.0051                                        |
|                                                                                       |                                                                        |           | 298.151  | 1.565418                     | 517.4290                                          | 279.9077                                          | 399.1485                                         | 399.1191                                    | -0.0294                                       |
|                                                                                       |                                                                        |           | 298.152  | 1.565192                     | 517.4293                                          | 279.9079                                          | 399.1487                                         | 399.1767                                    | 0.0280                                        |
|                                                                                       |                                                                        |           | 303.149  | 1.560193                     | 519.0111                                          | 280.8413                                          | 400.4076                                         | 400.4557                                    | 0.0481                                        |
|                                                                                       |                                                                        |           | 303.150  | 1.560414                     | 519.0115                                          | 280.8415                                          | 400.4079                                         | 400.3990                                    | -0.0089                                       |
|                                                                                       |                                                                        |           | 313.149  | 1.5502                       | 522.2059                                          | 282.7279                                          | 402.9510                                         | 403.0372                                    | 0.0862                                        |
|                                                                                       |                                                                        |           | 323.148  | 1.540217                     | 525.4398                                          | 284.6399                                          | 405.5266                                         | 405.6495                                    | 0.1228                                        |
|                                                                                       |                                                                        |           | 333.149  | 1.530301                     | 528.7148                                          | 286.5784                                          | 408.1360                                         | 408.2780                                    | 0.1420                                        |
|                                                                                       |                                                                        | 0.5965    | 298.153  | 1.55662                      | 517.4297                                          | 279.9081                                          | 375.7445                                         | 375.7199                                    | -0.0246                                       |
|                                                                                       |                                                                        |           | 303.149  | 1.551613                     | 519.0111                                          | 280.8413                                          | 376.9393                                         | 376.9323                                    | -0.0070                                       |

| IL1                                                                                                  | IL2                                                    | $x_{IL2}$ | $T$<br>K | $\rho$<br>g·cm <sup>-3</sup> | $V_{m,IL1}$<br>cm <sup>3</sup> ·mol <sup>-1</sup> | $V_{m,IL2}$<br>cm <sup>3</sup> ·mol <sup>-1</sup> | $V_m^{id}$<br>cm <sup>3</sup> ·mol <sup>-1</sup> | $V_m$<br>cm <sup>3</sup> ·mol <sup>-1</sup> | $V_m^E$<br>cm <sup>3</sup> ·mol <sup>-1</sup> |
|------------------------------------------------------------------------------------------------------|--------------------------------------------------------|-----------|----------|------------------------------|---------------------------------------------------|---------------------------------------------------|--------------------------------------------------|---------------------------------------------|-----------------------------------------------|
|                                                                                                      |                                                        |           | 313.149  | 1.541581                     | 522.2059                                          | 282.7279                                          | 379.3537                                         | 379.3852                                    | 0.0315                                        |
|                                                                                                      |                                                        |           | 323.149  | 1.531606                     | 525.4402                                          | 284.6401                                          | 381.7994                                         | 381.8561                                    | 0.0567                                        |
|                                                                                                      |                                                        |           | 333.149  | 1.52174                      | 528.7148                                          | 286.5784                                          | 384.2768                                         | 384.3318                                    | 0.0550                                        |
|                                                                                                      |                                                        |           | 353.149  | 1.502275                     | 535.3880                                          | 290.5351                                          | 389.3296                                         | 389.3116                                    | -0.0180                                       |
| [(C <sub>7</sub> O <sub>3</sub> )imC <sub>1</sub> imC <sub>1</sub> ][NTf <sub>2</sub> ] <sub>2</sub> | [C <sub>10</sub> C <sub>1</sub> im][NTf <sub>2</sub> ] | 0.4996    | 298.149  | 1.464811                     | 542.9109                                          | 393.8149                                          | 468.4182                                         | 469.1572                                    | 0.7390                                        |
|                                                                                                      |                                                        |           | 298.151  | 1.464921                     | 542.9116                                          | 393.8154                                          | 468.4188                                         | 469.1220                                    | 0.7032                                        |
|                                                                                                      |                                                        |           | 303.148  | 1.460124                     | 544.5378                                          | 395.1304                                          | 469.8895                                         | 470.6632                                    | 0.7737                                        |
|                                                                                                      |                                                        |           | 303.152  | 1.460229                     | 544.5391                                          | 395.1315                                          | 469.8907                                         | 470.6294                                    | 0.7387                                        |
|                                                                                                      |                                                        |           | 313.147  | 1.450853                     | 547.8211                                          | 397.7883                                          | 472.8603                                         | 473.6708                                    | 0.8104                                        |
|                                                                                                      |                                                        |           | 323.149  | 1.441647                     | 551.1454                                          | 400.4829                                          | 475.8700                                         | 476.6955                                    | 0.8255                                        |
|                                                                                                      |                                                        |           | 333.149  | 1.432463                     | 554.5095                                          | 403.2138                                          | 478.9177                                         | 479.7517                                    | 0.8340                                        |
|                                                                                                      |                                                        |           | 353.149  | 1.414297                     | 561.3625                                          | 408.7888                                          | 485.1322                                         | 485.9139                                    | 0.7817                                        |
| [C <sub>10</sub> imC <sub>1</sub> imC <sub>1</sub> ][NTf <sub>2</sub> ] <sub>2</sub>                 | [C <sub>10</sub> C <sub>1</sub> im][NTf <sub>2</sub> ] | 0.4993    | 298.152  | 1.389828                     | 591.2529                                          | 393.8157                                          | 492.6672                                         | 492.4175                                    | -0.2497                                       |
|                                                                                                      |                                                        |           | 303.149  | 1.385332                     | 593.0612                                          | 395.1307                                          | 494.2292                                         | 494.0156                                    | -0.2136                                       |
|                                                                                                      |                                                        |           | 313.149  | 1.376387                     | 596.7134                                          | 397.7888                                          | 497.3850                                         | 497.2262                                    | -0.1588                                       |
|                                                                                                      |                                                        |           | 323.149  | 1.367573                     | 600.4109                                          | 400.4829                                          | 500.5815                                         | 500.4308                                    | -0.1507                                       |
|                                                                                                      |                                                        |           | 333.149  | 1.358785                     | 604.1545                                          | 403.2138                                          | 503.8194                                         | 503.6674                                    | -0.1520                                       |
|                                                                                                      |                                                        |           | 353.149  | 1.341358                     | 611.7835                                          | 408.7888                                          | 510.4228                                         | 510.2110                                    | -0.2117                                       |
| [(C <sub>3</sub> O)C <sub>1</sub> im][NTf <sub>2</sub> ]                                             | [C <sub>2</sub> C <sub>1</sub> im][NTf <sub>2</sub> ]  | 0.2500    | 303.149  | 1.503135                     | 280.8413                                          | 258.5055                                          | 275.2577                                         | 275.3052                                    | 0.0476                                        |
|                                                                                                      |                                                        |           | 313.149  | 1.49302                      | 282.7279                                          | 260.2150                                          | 277.1001                                         | 277.1704                                    | 0.0703                                        |
|                                                                                                      |                                                        |           | 323.149  | 1.482975                     | 284.6401                                          | 261.9474                                          | 278.9673                                         | 279.0478                                    | 0.0805                                        |
|                                                                                                      |                                                        |           | 333.148  | 1.473004                     | 286.5782                                          | 263.7027                                          | 280.8597                                         | 280.9367                                    | 0.0771                                        |
|                                                                                                      |                                                        |           | 353.148  | 1.453278                     | 290.5349                                          | 267.2853                                          | 284.7229                                         | 284.7500                                    | 0.0271                                        |
|                                                                                                      |                                                        | 0.3993    | 313.149  | 1.494939                     | 282.7279                                          | 260.2150                                          | 273.7382                                         | 273.8153                                    | 0.0771                                        |
|                                                                                                      |                                                        | 0.7492    | 303.148  | 1.51005                      | 280.8411                                          | 258.5053                                          | 264.1061                                         | 264.1172                                    | 0.0111                                        |
|                                                                                                      |                                                        |           | 313.147  | 1.499953                     | 282.7276                                          | 260.2147                                          | 265.8599                                         | 265.8951                                    | 0.0352                                        |
|                                                                                                      |                                                        |           | 323.149  | 1.48992                      | 284.6401                                          | 261.9474                                          | 267.6376                                         | 267.6856                                    | 0.0479                                        |
|                                                                                                      |                                                        |           | 333.149  | 1.479962                     | 286.5784                                          | 263.7029                                          | 269.4390                                         | 269.4867                                    | 0.0477                                        |
|                                                                                                      |                                                        |           | 353.149  | 1.460316                     | 290.5351                                          | 267.2855                                          | 273.1154                                         | 273.1122                                    | -0.0032                                       |
| [(C <sub>3</sub> O)C <sub>1</sub> im][NTf <sub>2</sub> ]                                             | [C <sub>10</sub> C <sub>1</sub> im][NTf <sub>2</sub> ] | 0.2535    | 298.149  | 1.430744                     | 279.9073                                          | 393.8149                                          | 308.7881                                         | 309.0461                                    | 0.2580                                        |
|                                                                                                      |                                                        |           | 303.149  | 1.425896                     | 280.8413                                          | 395.1307                                          | 309.8188                                         | 310.0969                                    | 0.2781                                        |
|                                                                                                      |                                                        |           | 313.149  | 1.416261                     | 282.7279                                          | 397.7888                                          | 311.9011                                         | 312.2065                                    | 0.3054                                        |
|                                                                                                      |                                                        |           | 323.149  | 1.406699                     | 284.6401                                          | 400.4829                                          | 314.0116                                         | 314.3287                                    | 0.3172                                        |
|                                                                                                      |                                                        |           | 333.149  | 1.3972                       | 286.5784                                          | 403.2138                                          | 316.1508                                         | 316.4657                                    | 0.3150                                        |
|                                                                                                      |                                                        |           | 353.149  | 1.378391                     | 290.5351                                          | 408.7888                                          | 320.5178                                         | 320.7841                                    | 0.2663                                        |
|                                                                                                      |                                                        | 0.4995    | 293.151  | 1.375744                     | 278.9800                                          | 392.5084                                          | 335.6873                                         | 336.0951                                    | 0.4078                                        |
|                                                                                                      |                                                        |           | 298.149  | 1.371226                     | 279.9073                                          | 393.8149                                          | 336.8040                                         | 337.2025                                    | 0.3985                                        |
|                                                                                                      |                                                        |           | 303.149  | 1.366594                     | 280.8413                                          | 395.1307                                          | 337.9287                                         | 338.3454                                    | 0.4167                                        |
|                                                                                                      |                                                        |           | 313.149  | 1.357356                     | 282.7279                                          | 397.7888                                          | 340.2007                                         | 340.6481                                    | 0.4474                                        |
|                                                                                                      |                                                        |           | 323.148  | 1.348168                     | 284.6399                                          | 400.4827                                          | 342.5032                                         | 342.9697                                    | 0.4665                                        |



| IL1                                                                     | IL2                                                    | $x_{iL2}$ | $T$<br>K | $\rho$<br>g·cm <sup>-3</sup> | $V_{m,IL1}$<br>cm <sup>3</sup> ·mol <sup>-1</sup> | $V_{m,IL2}$<br>cm <sup>3</sup> ·mol <sup>-1</sup> | $V_m^{id}$<br>cm <sup>3</sup> ·mol <sup>-1</sup> | $V_m$<br>cm <sup>3</sup> ·mol <sup>-1</sup> | $V_m^E$<br>cm <sup>3</sup> ·mol <sup>-1</sup> |
|-------------------------------------------------------------------------|--------------------------------------------------------|-----------|----------|------------------------------|---------------------------------------------------|---------------------------------------------------|--------------------------------------------------|---------------------------------------------|-----------------------------------------------|
|                                                                         |                                                        |           | 333.149  | 1.338997                     | 286.5784                                          | 403.2138                                          | 344.8376                                         | 345.3188                                    | 0.4812                                        |
|                                                                         |                                                        |           | 353.499  | 1.320786                     | 290.6054                                          | 408.8877                                          | 349.6873                                         | 350.0800                                    | 0.3928                                        |
|                                                                         |                                                        | 0.7491    | 293.151  | 1.325254                     | 278.9800                                          | 392.5084                                          | 364.0267                                         | 364.3810                                    | 0.3543                                        |
|                                                                         |                                                        |           | 298.149  | 1.321072                     | 279.9073                                          | 393.8149                                          | 365.2381                                         | 365.5345                                    | 0.2964                                        |
|                                                                         |                                                        |           | 303.149  | 1.316604                     | 280.8413                                          | 395.1307                                          | 366.4581                                         | 366.7750                                    | 0.3169                                        |
|                                                                         |                                                        |           | 313.149  | 1.307683                     | 282.7279                                          | 397.7888                                          | 368.9227                                         | 369.2771                                    | 0.3544                                        |
|                                                                         |                                                        |           | 323.149  | 1.298795                     | 284.6401                                          | 400.4829                                          | 371.4207                                         | 371.8042                                    | 0.3835                                        |
|                                                                         |                                                        |           | 333.148  | 1.289919                     | 286.5782                                          | 403.2135                                          | 373.9524                                         | 374.3626                                    | 0.4102                                        |
|                                                                         |                                                        |           | 353.147  | 1.272162                     | 290.5347                                          | 408.7882                                          | 379.1212                                         | 379.5880                                    | 0.4668                                        |
| [(C <sub>7</sub> O <sub>3</sub> )C <sub>1</sub> im][NTf <sub>2</sub> ]  | [C <sub>10</sub> C <sub>1</sub> im][NTf <sub>2</sub> ] | 0.5003    | 298.151  | 1.348145                     | 357.2184                                          | 393.8154                                          | 375.5279                                         | 375.6816                                    | 0.1537                                        |
|                                                                         |                                                        |           | 313.149  | 1.334516                     | 360.8056                                          | 397.7888                                          | 379.3083                                         | 379.5183                                    | 0.2100                                        |
|                                                                         |                                                        |           | 323.149  | 1.325513                     | 363.2378                                          | 400.4829                                          | 381.8715                                         | 382.0960                                    | 0.2245                                        |
|                                                                         |                                                        |           | 333.149  | 1.31658                      | 365.7029                                          | 403.2138                                          | 384.4696                                         | 384.6885                                    | 0.2189                                        |
|                                                                         |                                                        |           | 353.149  | 1.298887                     | 370.7350                                          | 408.7888                                          | 389.7733                                         | 389.9286                                    | 0.1553                                        |
| [C <sub>10</sub> C <sub>1</sub> C <sub>1</sub> biim][NTf <sub>2</sub> ] | [C <sub>10</sub> C <sub>1</sub> im][NTf <sub>2</sub> ] | 0.2037    | 298.149  | 1.287657                     | 452.5575                                          | 393.8149                                          | 440.5902                                         | 440.5604                                    | -0.0298                                       |
|                                                                         |                                                        |           | 303.148  | 1.283391                     | 454.0469                                          | 395.1304                                          | 442.0442                                         | 442.0248                                    | -0.0193                                       |
|                                                                         |                                                        |           | 313.149  | 1.274828                     | 457.0562                                          | 397.7888                                          | 444.9820                                         | 444.9939                                    | 0.0119                                        |
|                                                                         |                                                        |           | 333.149  | 1.25777                      | 463.1956                                          | 403.2138                                          | 450.9758                                         | 451.0290                                    | 0.0531                                        |
|                                                                         |                                                        |           | 353.149  | 1.240952                     | 469.5021                                          | 408.7888                                          | 457.1333                                         | 457.1415                                    | 0.0082                                        |
|                                                                         |                                                        | 0.5070    | 298.151  | 1.284666                     | 452.5581                                          | 393.8154                                          | 422.7741                                         | 422.6775                                    | -0.0966                                       |
|                                                                         |                                                        |           | 298.152  | 1.284636                     | 452.5584                                          | 393.8157                                          | 422.7744                                         | 422.6874                                    | -0.0870                                       |
|                                                                         |                                                        |           | 303.148  | 1.280381                     | 454.0469                                          | 395.1304                                          | 424.1748                                         | 424.0921                                    | -0.0827                                       |
|                                                                         |                                                        |           | 303.149  | 1.280332                     | 454.0472                                          | 395.1307                                          | 424.1751                                         | 424.1083                                    | -0.0668                                       |
|                                                                         |                                                        |           | 313.149  | 1.271772                     | 457.0562                                          | 397.7888                                          | 427.0062                                         | 426.9629                                    | -0.0433                                       |
|                                                                         |                                                        |           | 313.149  | 1.271718                     | 457.0562                                          | 397.7888                                          | 427.0062                                         | 426.9810                                    | -0.0252                                       |
|                                                                         |                                                        |           | 313.152  | 1.271708                     | 457.0571                                          | 397.7896                                          | 427.0071                                         | 426.9844                                    | -0.0227                                       |
|                                                                         |                                                        |           | 333.149  | 1.254713                     | 463.1956                                          | 403.2138                                          | 432.7834                                         | 432.7679                                    | -0.0155                                       |
|                                                                         |                                                        |           | 333.149  | 1.254658                     | 463.1956                                          | 403.2138                                          | 432.7834                                         | 432.7868                                    | 0.0034                                        |
|                                                                         |                                                        |           | 353.149  | 1.237892                     | 469.5021                                          | 408.7888                                          | 438.7190                                         | 438.6485                                    | -0.0705                                       |
|                                                                         |                                                        |           | 353.149  | 1.237836                     | 469.5021                                          | 408.7888                                          | 438.7190                                         | 438.6683                                    | -0.0507                                       |

**Table S8**

Fitting parameters of the zero order Redlich–Kister polynomial  $V_m^E = (1 - x_{IL2})x_{IL2}A_0$  for the excess molar volumes ( $V_m^E = V_m^{id} - V_m$ ) of the studied binary ionic liquid (IL) mixtures at various temperatures ( $T$ ). For each fit the maximum excess molar volume ( $V_m^{E,max}$ ) at equimolar composition of the mixture is given as well as the absolute average deviation  $AAD = \sum |V_m - V_m^{fit}|/n$ , where  $n$  is the amount of data points available for the fit.

| IL1                                                                                                   | IL2                                                                    | $T$<br>K | $A_0$<br>$\text{cm}^3 \cdot \text{mol}^{-1}$ | $V_m^{E,max}$<br>$\text{cm}^3 \cdot \text{mol}^{-1}$ | AAD<br>$\text{cm}^3 \cdot \text{mol}^{-1}$ | $n$ |
|-------------------------------------------------------------------------------------------------------|------------------------------------------------------------------------|----------|----------------------------------------------|------------------------------------------------------|--------------------------------------------|-----|
| [[C <sub>3</sub> O]im) <sub>2</sub> C <sub>1</sub> ][NTf <sub>2</sub> ] <sub>2</sub>                  | [C <sub>10</sub> C <sub>1</sub> im][NTf <sub>2</sub> ]                 | 293.15   | 3.11856598                                   | 0.7796415                                            | 3.82E-09                                   | 1   |
|                                                                                                       |                                                                        | 298.15   | 4.06582098                                   | 1.01645524                                           | 0.46183812                                 | 4   |
|                                                                                                       |                                                                        | 303.15   | 4.23610596                                   | 1.05902649                                           | 0.49457735                                 | 4   |
|                                                                                                       |                                                                        | 313.15   | 4.7031643                                    | 1.17579107                                           | 1.0220068                                  | 6   |
|                                                                                                       |                                                                        | 323.15   | 4.78076843                                   | 1.19519211                                           | 0.53006999                                 | 3   |
|                                                                                                       |                                                                        | 333.15   | 4.38855204                                   | 1.09713801                                           | 0.15631878                                 | 2   |
|                                                                                                       |                                                                        | 353.15   | 4.55552607                                   | 1.13888152                                           | 6.02E-08                                   | 1   |
| [[C <sub>3</sub> O]im) <sub>2</sub> C <sub>1</sub> ][NTf <sub>2</sub> ] <sub>2</sub>                  | [(C <sub>7</sub> O <sub>3</sub> )C <sub>1</sub> im][NTf <sub>2</sub> ] | 298.15   | -0.9009609                                   | -0.2252402                                           | 0.11171262                                 | 6   |
|                                                                                                       |                                                                        | 303.15   | -0.7853187                                   | -0.1963297                                           | 0.04038508                                 | 4   |
|                                                                                                       |                                                                        | 313.15   | -0.5913764                                   | -0.1478441                                           | 0.04744294                                 | 4   |
|                                                                                                       |                                                                        | 323.15   | -0.4958596                                   | -0.1239649                                           | 0.02107541                                 | 2   |
|                                                                                                       |                                                                        | 333.15   | -0.476178                                    | -0.1190445                                           | 0.01216703                                 | 3   |
|                                                                                                       |                                                                        | 353.15   | -0.8311708                                   | -0.2077927                                           | 0.03973124                                 | 3   |
| [[C <sub>3</sub> O]im) <sub>2</sub> C <sub>1</sub> ][NTf <sub>2</sub> ] <sub>2</sub>                  | [(C <sub>5</sub> O <sub>2</sub> )C <sub>1</sub> im][NTf <sub>2</sub> ] | 303.15   | -0.4553373                                   | -0.1138343                                           | 1.2E-09                                    | 1   |
|                                                                                                       |                                                                        | 308.15   | -0.2923584                                   | -0.0730896                                           | 1.19E-09                                   | 1   |
|                                                                                                       |                                                                        | 313.15   | -0.3672198                                   | -0.0918049                                           | 0.04933503                                 | 3   |
|                                                                                                       |                                                                        | 323.15   | -0.1621996                                   | -0.0405499                                           | 0.14609591                                 | 6   |
|                                                                                                       |                                                                        | 333.15   | -0.196444                                    | -0.049111                                            | 0.06611453                                 | 4   |
|                                                                                                       |                                                                        | 343.15   | -0.229416                                    | -0.057354                                            | 1.18E-09                                   | 1   |
|                                                                                                       |                                                                        | 353.15   | -0.5614844                                   | -0.1403711                                           | 0.01768732                                 | 3   |
| [[C <sub>3</sub> O]im) <sub>2</sub> C <sub>1</sub> ][NTf <sub>2</sub> ] <sub>2</sub>                  | [(C <sub>3</sub> O)C <sub>1</sub> im][NTf <sub>2</sub> ]               | 293.15   | 0.02030328                                   | 0.00507582                                           | 1.86E-09                                   | 1   |
|                                                                                                       |                                                                        | 298.15   | -0.0343072                                   | -0.0085768                                           | 0.07375361                                 | 3   |
|                                                                                                       |                                                                        | 303.15   | 0.04444816                                   | 0.01111204                                           | 0.07462862                                 | 3   |
|                                                                                                       |                                                                        | 313.15   | 0.23883171                                   | 0.05970793                                           | 0.05474256                                 | 3   |
|                                                                                                       |                                                                        | 323.15   | 0.3494937                                    | 0.08737342                                           | 0.07684875                                 | 3   |
|                                                                                                       |                                                                        | 333.15   | 0.36958536                                   | 0.09239634                                           | 0.10949457                                 | 3   |
|                                                                                                       |                                                                        | 353.15   | -0.1471114                                   | -0.0367778                                           | 0.04309287                                 | 2   |
| [(C <sub>7</sub> O <sub>3</sub> )im)C <sub>1</sub> imC <sub>1</sub> ][NTf <sub>2</sub> ] <sub>2</sub> | [C <sub>10</sub> C <sub>1</sub> im][NTf <sub>2</sub> ]                 | 298.15   | 2.88436667                                   | 0.72109167                                           | 0.0358155                                  | 2   |
|                                                                                                       |                                                                        | 303.15   | 3.02479929                                   | 0.75619982                                           | 0.03502473                                 | 2   |
|                                                                                                       |                                                                        | 313.15   | 3.24166717                                   | 0.81041679                                           | 1.45E-08                                   | 1   |
|                                                                                                       |                                                                        | 323.15   | 3.30193815                                   | 0.82548454                                           | 0.000000024                                | 1   |
|                                                                                                       |                                                                        | 333.15   | 3.3360064                                    | 0.8340016                                            | 2.54E-08                                   | 1   |
|                                                                                                       |                                                                        | 353.15   | 3.1268536                                    | 0.7817134                                            | 2.28E-08                                   | 1   |
| [C <sub>10</sub> im)C <sub>1</sub> imC <sub>1</sub> ][NTf <sub>2</sub> ] <sub>2</sub>                 | [C <sub>10</sub> C <sub>1</sub> im][NTf <sub>2</sub> ]                 | 298.15   | -0.9987282                                   | -0.2496821                                           | 3.86E-09                                   | 1   |

| IL1                                                                     | IL2                                                    | $T$<br>K | $A_0$<br>$\text{cm}^3 \cdot \text{mol}^{-1}$ | $V_m^{E,max}$<br>$\text{cm}^3 \cdot \text{mol}^{-1}$ | AAD<br>$\text{cm}^3 \cdot \text{mol}^{-1}$ | $n$ |
|-------------------------------------------------------------------------|--------------------------------------------------------|----------|----------------------------------------------|------------------------------------------------------|--------------------------------------------|-----|
|                                                                         |                                                        | 303.15   | -0.854237                                    | -0.2135593                                           | 1.65E-09                                   | 1   |
|                                                                         |                                                        | 313.15   | -0.6353443                                   | -0.1588361                                           | 2.16E-09                                   | 1   |
|                                                                         |                                                        | 323.15   | -0.6027613                                   | -0.1506903                                           | 1.96E-09                                   | 1   |
|                                                                         |                                                        | 333.15   | -0.6081524                                   | -0.1520381                                           | 4.49E-09                                   | 1   |
|                                                                         |                                                        | 353.15   | -0.8469533                                   | -0.2117383                                           | 3.21E-09                                   | 1   |
| [(C <sub>3</sub> O)C <sub>1</sub> im][NTf <sub>2</sub> ]                | [C <sub>2</sub> C <sub>1</sub> im][NTf <sub>2</sub> ]  | 303.15   | 0.15618655                                   | 0.03904664                                           | 0.03657039                                 | 2   |
|                                                                         |                                                        | 313.15   | 0.29920842                                   | 0.07480211                                           | 0.040576                                   | 3   |
|                                                                         |                                                        | 323.15   | 0.34220345                                   | 0.08555086                                           | 0.03272668                                 | 2   |
|                                                                         |                                                        | 333.15   | 0.3324388                                    | 0.0831097                                            | 0.02947992                                 | 2   |
|                                                                         |                                                        | 353.15   | 0.06360448                                   | 0.01590112                                           | 0.03039754                                 | 2   |
| [(C <sub>3</sub> O)C <sub>1</sub> im][NTf <sub>2</sub> ]                | [C <sub>10</sub> C <sub>1</sub> im][NTf <sub>2</sub> ] | 293.15   | 1.72298416                                   | 0.43074604                                           | 0.05342065                                 | 2   |
|                                                                         |                                                        | 298.15   | 1.52764824                                   | 0.38191206                                           | 0.0569037                                  | 3   |
|                                                                         |                                                        | 303.15   | 1.61895929                                   | 0.40473982                                           | 0.05294908                                 | 3   |
|                                                                         |                                                        | 313.15   | 1.76799438                                   | 0.44199859                                           | 0.05681298                                 | 3   |
|                                                                         |                                                        | 323.15   | 1.86120491                                   | 0.46530123                                           | 0.0700144                                  | 3   |
|                                                                         |                                                        | 333.15   | 1.92298074                                   | 0.48074519                                           | 0.09817516                                 | 3   |
|                                                                         |                                                        | 353.15   | 1.94166192                                   | 0.48541548                                           | 0.20312558                                 | 3   |
| [(C <sub>7</sub> O <sub>3</sub> )C <sub>1</sub> im][NTf <sub>2</sub> ]  | [C <sub>10</sub> C <sub>1</sub> im][NTf <sub>2</sub> ] | 298.15   | 0.61479185                                   | 0.15369796                                           | 2.18E-09                                   | 1   |
|                                                                         |                                                        | 313.15   | 0.83990581                                   | 0.20997645                                           | 3.52E-09                                   | 1   |
|                                                                         |                                                        | 323.15   | 0.89794852                                   | 0.22448713                                           | 7.02E-10                                   | 1   |
|                                                                         |                                                        | 333.15   | 0.87568437                                   | 0.21892109                                           | 3.18E-09                                   | 1   |
|                                                                         |                                                        | 353.15   | 0.62127749                                   | 0.15531937                                           | 1.44E-09                                   | 1   |
| [C <sub>10</sub> C <sub>1</sub> C <sub>1</sub> biim][NTf <sub>2</sub> ] | [C <sub>10</sub> C <sub>1</sub> im][NTf <sub>2</sub> ] | 298.15   | -0.3353225                                   | -0.0838306                                           | 0.04064084                                 | 3   |
|                                                                         |                                                        | 303.15   | -0.2677862                                   | -0.0669466                                           | 0.04007477                                 | 3   |
|                                                                         |                                                        | 313.15   | -0.0976546                                   | -0.0244137                                           | 0.04917819                                 | 4   |
|                                                                         |                                                        | 333.15   | 0.03701483                                   | 0.00925371                                           | 0.07772158                                 | 3   |
|                                                                         |                                                        | 353.15   | -0.1914961                                   | -0.047874                                            | 0.06474839                                 | 3   |

**Table S9**

Partial molar excess enthalpy at infinite dilution ( $H_i^{E,\infty}$ ), the (excess) enthalpy of mixing at equimolar composition ( $H_{x_2=0.5}^E$ ), and the maximum excess molar volume ( $V_m^{E,max}$ ) at equimolar composition of the mixture for the studied binary mixtures of ILs with common [NTF<sub>2</sub>]<sup>-</sup> anions. The symbols, colours, and line styles correspond to Fig. 5 of the main text.

| IL <sub>1</sub> | IL <sub>2</sub> | Sym | $H_1^{E,\infty}$<br>kJ·mol <sup>-1</sup> | $H_2^{E,\infty}$<br>kJ·mol <sup>-1</sup> | $H_{x_2=0.5}^E$<br>kJ·mol <sup>-1</sup> | $V_m^{E,max}$<br>cm <sup>3</sup> ·mol <sup>-1</sup> |
|-----------------|-----------------|-----|------------------------------------------|------------------------------------------|-----------------------------------------|-----------------------------------------------------|
|                 |                 | ●   | 3.41                                     | 5.44                                     | 0.97                                    | 1.15                                                |
|                 |                 | ●   | -3.47                                    | -3.84                                    | -0.95                                   | -0.17                                               |
|                 |                 | ●   | -0.90                                    | -1.03                                    | -0.24                                   | -0.12                                               |
|                 |                 | ●   | 0.18                                     | 0.24                                     | 0.05                                    | 0.04                                                |
|                 |                 | ▼   | 4.05                                     | 6.33                                     | 1.27                                    | 0.77                                                |
|                 |                 | ◆   | 0.94                                     | 0.64                                     | 0.20                                    | -0.19                                               |
|                 |                 | △   | 0.15                                     | 0.17                                     | 0.04                                    | 0.05                                                |
|                 |                 | △   | 2.29                                     | 4.00                                     | 0.69                                    | 0.42                                                |
|                 |                 | □   | 1.29                                     | 2.16                                     | 0.47                                    | 0.19                                                |
|                 |                 | ◇   | 0.43                                     | 0.31                                     | 0.08                                    | -0.02                                               |

## Viscosities

**Table S10**

Pure ionic liquid viscosity ( $\eta$ ) data at atmospheric pressure and temperature ( $T$ ). IL numbers correspond to table 1 of the manuscript.

| no     | IL                                                                     | T<br>K  | $\eta$<br>mPa·s | no     | IL                                                                                   | T<br>K | $\eta$<br>mPa·s                                                                                      |        |                                                                                       |
|--------|------------------------------------------------------------------------|---------|-----------------|--------|--------------------------------------------------------------------------------------|--------|------------------------------------------------------------------------------------------------------|--------|---------------------------------------------------------------------------------------|
| 1      | [C <sub>2</sub> C <sub>1</sub> im][NTf <sub>2</sub> ]                  | 293.15  | 38.174          | 5      | [(C <sub>7</sub> O <sub>3</sub> )C <sub>1</sub> im][NTf <sub>2</sub> ]               | 298.15 | 83.517                                                                                               |        |                                                                                       |
|        |                                                                        | 298.15  | 31.795          |        |                                                                                      | 303.15 | 64.45                                                                                                |        |                                                                                       |
|        |                                                                        | 303.15  | 26.777          |        |                                                                                      | 313.15 | 41.146                                                                                               |        |                                                                                       |
|        |                                                                        | 313.15  | 19.725          |        |                                                                                      | 313.15 | 41.026                                                                                               |        |                                                                                       |
|        |                                                                        | 323.15  | 15.115          |        |                                                                                      | 313.15 | 40.782                                                                                               |        |                                                                                       |
|        |                                                                        | 333.15  | 12.014          |        |                                                                                      | 323.15 | 28.051                                                                                               |        |                                                                                       |
|        |                                                                        | 353.15  | 7.846           |        |                                                                                      | 333.15 | 20.166                                                                                               |        |                                                                                       |
| 2      | [C <sub>10</sub> C <sub>1</sub> im][NTf <sub>2</sub> ]                 | 298.15  | 112.5           | 6      | [C <sub>10</sub> imC <sub>1</sub> imC <sub>1</sub> ][NTf <sub>2</sub> ] <sub>2</sub> | 323.15 | 1201.9                                                                                               |        |                                                                                       |
|        |                                                                        | 303.15  | 87.308          |        |                                                                                      | 333.15 | 614.8                                                                                                |        |                                                                                       |
|        |                                                                        | 313.15  | 55.395          |        |                                                                                      | 353.15 | 207.12                                                                                               |        |                                                                                       |
|        |                                                                        | 313.15  | 57.423          |        |                                                                                      | 7      | [(C <sub>7</sub> O <sub>3</sub> )imC <sub>1</sub> imC <sub>1</sub> ][NTf <sub>2</sub> ] <sub>2</sub> | 333.15 | 713.48                                                                                |
|        |                                                                        | 313.15  | 56.423          |        |                                                                                      |        |                                                                                                      | 353.15 | 222.46                                                                                |
|        |                                                                        | 313.15  | 55.959          |        |                                                                                      |        |                                                                                                      | 9      | [((C <sub>3</sub> O)im) <sub>2</sub> C <sub>1</sub> ][NTf <sub>2</sub> ] <sub>2</sub> |
|        |                                                                        | 323.15  | 37.575          |        |                                                                                      | 313.15 | 1211.5                                                                                               |        |                                                                                       |
| 333.15 | 26.582                                                                 | 313.15  | 1150.8          |        |                                                                                      |        |                                                                                                      |        |                                                                                       |
| 3      | [(C <sub>3</sub> O)C <sub>1</sub> im][NTf <sub>2</sub> ]               | 298.151 | 45.088          | 323.15 | 573.8                                                                                |        |                                                                                                      |        |                                                                                       |
|        |                                                                        | 303.149 | 36.567          | 323.15 | 551.66                                                                               |        |                                                                                                      |        |                                                                                       |
|        |                                                                        | 313.149 | 25.261          | 333.15 | 306.1                                                                                |        |                                                                                                      |        |                                                                                       |
|        |                                                                        | 323.149 | 18.425          | 333.15 | 294.28                                                                               |        |                                                                                                      |        |                                                                                       |
|        |                                                                        | 333.147 | 14.088          | 343.15 | 178.76                                                                               |        |                                                                                                      |        |                                                                                       |
|        |                                                                        | 353.148 | 8.8267          | 353.15 | 112.43                                                                               |        |                                                                                                      |        |                                                                                       |
|        |                                                                        | 353.15  | 15.016          | 353.15 | 108.52                                                                               |        |                                                                                                      |        |                                                                                       |
| 4      | [(C <sub>5</sub> O <sub>2</sub> )C <sub>1</sub> im][NTf <sub>2</sub> ] | 298.15  | 56.173          | 11     | [C <sub>10</sub> C <sub>1</sub> C <sub>1</sub> biim][NTf <sub>2</sub> ]              | 298.15 | 770                                                                                                  |        |                                                                                       |
|        |                                                                        | 303.15  | 44.762          |        |                                                                                      | 313.15 | 268.3                                                                                                |        |                                                                                       |
|        |                                                                        | 313.15  | 30.101          |        |                                                                                      | 333.15 | 148.4                                                                                                |        |                                                                                       |
|        |                                                                        | 333.15  | 15.939          |        |                                                                                      |        |                                                                                                      |        |                                                                                       |
|        |                                                                        | 353.15  | 9.7042          |        |                                                                                      |        |                                                                                                      |        |                                                                                       |

**Table S11**

Fitting parameters of the Vogel–Fülcher–Tammann–Hesse equation,  $\ln \eta = A + B/(T - T_0)$ , used for the interpolation of the pure ionic liquid (IL) viscosities ( $\eta$ ) studied at atmospheric pressure as a function of temperature ( $T$ ) within temperature range  $T_{\text{range}}$ . IL numbers correspond to table 1 of the manuscript, AAD is the absolute average deviation  $\sum |\eta - \eta_{\text{fit}}|/n$ .

| No IL                                                                                                  | <i>Trange</i> | <i>A</i> | <i>B</i> | <i>T</i> <sub>0</sub> | AAD    |
|--------------------------------------------------------------------------------------------------------|---------------|----------|----------|-----------------------|--------|
|                                                                                                        | K             |          | K        | K                     | mPa·s  |
| 1 [C <sub>2</sub> C <sub>1</sub> im][NTf <sub>2</sub> ]                                                | 293.15–353.15 | -1.7389  | 779.51   | 148.19                | 0.0728 |
| 2 [C <sub>10</sub> C <sub>1</sub> im][NTf <sub>2</sub> ]                                               | 298.15–353.15 | -2.2328  | 935.82   | 163.63                | 0.4045 |
| 3 [(C <sub>3</sub> O)C <sub>1</sub> im][NTf <sub>2</sub> ]                                             | 298.15–353.15 | -1.3979  | 629.68   | 177.16                | 0.0588 |
| 4 [(C <sub>5</sub> O <sub>2</sub> )C <sub>1</sub> im][NTf <sub>2</sub> ]                               | 298.15–353.15 | -1.5200  | 660.18   | 179.13                | 0.0531 |
| 5 [(C <sub>7</sub> O <sub>3</sub> )C <sub>1</sub> im][NTf <sub>2</sub> ]                               | 298.15–353.15 | -1.2186  | 587.39   | 194.06                | 0.0623 |
| 6 [C <sub>10</sub> imC <sub>1</sub> imC <sub>1</sub> ][NTf <sub>2</sub> ] <sub>2</sub>                 | 323.15–353.15 | -11.5716 | 5399.6   | 33.539                | 14.269 |
| 7 [(C <sub>7</sub> O <sub>3</sub> )imC <sub>1</sub> imC <sub>1</sub> ][NTf <sub>2</sub> ] <sub>2</sub> | 333.15–353.15 | -12.1379 | 5632.2   | 32.093                | 0.0001 |
| 9 [((C <sub>3</sub> O)im) <sub>2</sub> C <sub>1</sub> ][NTf <sub>2</sub> ] <sub>2</sub>                | 313.15–353.15 | -1.9117  | 1005.1   | 201.22                | 11.296 |
| 11 [C <sub>10</sub> C <sub>1</sub> C <sub>1</sub> biim][NTf <sub>2</sub> ]                             | 298.15–333.15 | 3.8014   | 72.486   | 272.67                | 0.0004 |

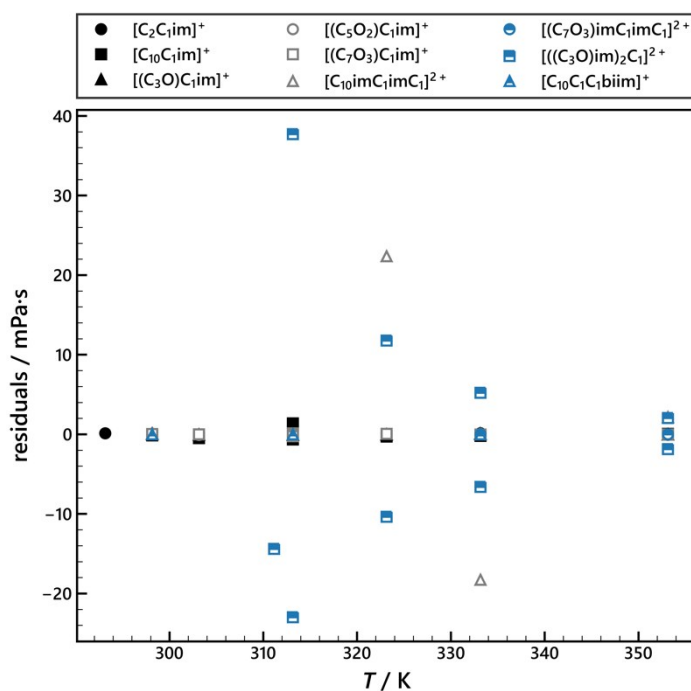**Figure S6**

Residual plot of the temperature ( $T$ ) versus dynamic viscosity ( $\eta$ ) fit for the studied ionic liquids using the Vogel–Fülcher–Tammann–Hesse equation  $\ln \eta = A + B/(T - T_0)$ .

## Calorimetric data for mixing of ionic liquids

**Table S12**

Stoichiometric data and heat effect of the calorimetry experiments for the different mixtures at 313.15 K. The subscripts c and d mean cell (or container) and dispenser (or syringe) respectively.

| [(C <sub>3</sub> O)C <sub>1</sub> im] <sub>(1-x)</sub> [C <sub>2</sub> C <sub>1</sub> im] <sub>x</sub> [NTf <sub>2</sub> ] |                       |                      |                      |        |
|----------------------------------------------------------------------------------------------------------------------------|-----------------------|----------------------|----------------------|--------|
| n <sub>1c</sub> / mol                                                                                                      | n <sub>2c</sub> / mol | n <sub>1d</sub> mmol | n <sub>2d</sub> mmol | Q / mJ |
| 0.0000E+00                                                                                                                 | 3.07876E-03           | 1.76136E-02          | 0.00000E+00          | 2.869  |
| 1.7614E-05                                                                                                                 | 3.07876E-03           | 1.76136E-02          | 0.00000E+00          | 2.799  |
| 3.5227E-05                                                                                                                 | 3.07876E-03           | 1.76136E-02          | 0.00000E+00          | 2.751  |
| 5.2841E-05                                                                                                                 | 3.07876E-03           | 1.76136E-02          | 0.00000E+00          | 2.764  |
| 7.0454E-05                                                                                                                 | 3.07876E-03           | 1.76136E-02          | 0.00000E+00          | 2.705  |
| 8.8068E-05                                                                                                                 | 3.07876E-03           | 1.76136E-02          | 0.00000E+00          | 2.655  |
| 1.0568E-04                                                                                                                 | 3.07876E-03           | 1.76136E-02          | 0.00000E+00          | 2.642  |
| 1.2330E-04                                                                                                                 | 3.07876E-03           | 1.76136E-02          | 0.00000E+00          | 2.598  |
| 1.4091E-04                                                                                                                 | 3.07876E-03           | 1.76136E-02          | 0.00000E+00          | 2.561  |
| 7.5444E-04                                                                                                                 | 2.25426E-03           | 0.00000E+00          | 3.06662E-02          | 0.316  |
| 7.5444E-04                                                                                                                 | 2.28493E-03           | 0.00000E+00          | 3.06662E-02          | 0.320  |
| 7.5444E-04                                                                                                                 | 2.31559E-03           | 0.00000E+00          | 3.06662E-02          | 0.320  |
| 7.5444E-04                                                                                                                 | 2.34626E-03           | 0.00000E+00          | 3.06662E-02          | 0.314  |
| 7.5444E-04                                                                                                                 | 2.37692E-03           | 0.00000E+00          | 3.06662E-02          | 0.371  |
| 7.5444E-04                                                                                                                 | 2.40759E-03           | 0.00000E+00          | 3.06662E-02          | 0.355  |
| 7.5444E-04                                                                                                                 | 2.43826E-03           | 0.00000E+00          | 3.06662E-02          | 0.286  |
| 7.5444E-04                                                                                                                 | 2.46892E-03           | 0.00000E+00          | 3.06662E-02          | 0.293  |
| 7.5444E-04                                                                                                                 | 2.49959E-03           | 2.82241E-02          | 0.00000E+00          | 2.272  |
| 7.8266E-04                                                                                                                 | 2.49959E-03           | 2.82241E-02          | 0.00000E+00          | 2.212  |
| 8.1089E-04                                                                                                                 | 2.49959E-03           | 2.82241E-02          | 0.00000E+00          | 2.177  |
| 8.3911E-04                                                                                                                 | 2.49959E-03           | 2.82241E-02          | 0.00000E+00          | 2.125  |
| 8.6734E-04                                                                                                                 | 2.49959E-03           | 2.82241E-02          | 0.00000E+00          | 2.099  |
| 8.9556E-04                                                                                                                 | 2.49959E-03           | 2.82241E-02          | 0.00000E+00          | 2.083  |
| 2.8287E-03                                                                                                                 | 1.91952E-05           | 0.00000E+00          | 3.06662E-02          | 4.430  |
| 2.8287E-03                                                                                                                 | 4.98614E-05           | 0.00000E+00          | 3.06662E-02          | 4.388  |
| 2.8287E-03                                                                                                                 | 8.05276E-05           | 0.00000E+00          | 3.06662E-02          | 4.379  |

|            |             |             |             |       |
|------------|-------------|-------------|-------------|-------|
| 2.8287E-03 | 1.11194E-04 | 0.00000E+00 | 3.06662E-02 | 4.303 |
| 2.8287E-03 | 1.41860E-04 | 0.00000E+00 | 3.06662E-02 | 4.170 |
| 2.8287E-03 | 1.72526E-04 | 0.00000E+00 | 3.06662E-02 | 4.122 |
| 2.8287E-03 | 2.03192E-04 | 0.00000E+00 | 3.06662E-02 | 4.118 |
| 2.8287E-03 | 2.33859E-04 | 0.00000E+00 | 3.06662E-02 | 4.079 |
| 2.8287E-03 | 2.64525E-04 | 0.00000E+00 | 3.06662E-02 | 3.926 |
| 2.8287E-03 | 2.95191E-04 | 0.00000E+00 | 3.06662E-02 | 3.796 |
| 1.7567E-03 | 1.16778E-03 | 3.53368E-02 | 0.00000E+00 | 0.548 |
| 1.7920E-03 | 1.16778E-03 | 3.53368E-02 | 0.00000E+00 | 0.638 |
| 1.8274E-03 | 1.16778E-03 | 3.53368E-02 | 0.00000E+00 | 0.527 |
| 1.8627E-03 | 1.16778E-03 | 3.53368E-02 | 0.00000E+00 | 0.509 |
| 1.8980E-03 | 1.16778E-03 | 3.53368E-02 | 0.00000E+00 | 0.587 |
| 1.9334E-03 | 1.16778E-03 | 0.00000E+00 | 3.83942E-02 | 2.436 |
| 1.9334E-03 | 1.20617E-03 | 0.00000E+00 | 3.83942E-02 | 2.411 |
| 1.9334E-03 | 1.24457E-03 | 0.00000E+00 | 3.83942E-02 | 2.393 |

---



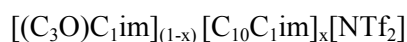

| $n_{1c}$ / mol | $n_{2c}$ / mol | $n_{1d}$ mmol | $n_{2d}$ mmol | Q / mJ |
|----------------|----------------|---------------|---------------|--------|
| 1.91260E-03    | 6.49650E-04    | 1.76656E-02   | 0.00000E+00   | 5.883  |
| 1.93027E-03    | 6.49650E-04    | 1.76656E-02   | 0.00000E+00   | 5.918  |
| 1.94793E-03    | 6.49650E-04    | 1.76656E-02   | 0.00000E+00   | 5.978  |
| 1.96560E-03    | 6.49650E-04    | 1.76656E-02   | 0.00000E+00   | 5.764  |
| 1.98326E-03    | 6.49650E-04    | 1.76656E-02   | 0.00000E+00   | 5.730  |
| 2.00093E-03    | 6.49650E-04    | 1.76656E-02   | 0.00000E+00   | 5.663  |
| 2.01859E-03    | 6.49650E-04    | 1.76656E-02   | 0.00000E+00   | 5.539  |
| 2.03626E-03    | 6.49650E-04    | 1.76656E-02   | 0.00000E+00   | 5.464  |
| 2.05392E-03    | 6.49650E-04    | 1.76656E-02   | 0.00000E+00   | 5.381  |
| 0.00000E+00    | 2.01020E-03    | 1.76656E-02   | 0.00000E+00   | 39.16  |
| 1.76656E-05    | 2.01020E-03    | 1.76656E-02   | 0.00000E+00   | 38.87  |
| 3.53312E-05    | 2.01020E-03    | 1.76656E-02   | 0.00000E+00   | 38.56  |
| 5.29969E-05    | 2.01020E-03    | 1.76656E-02   | 0.00000E+00   | 38.05  |
| 7.06625E-05    | 2.01020E-03    | 1.76656E-02   | 0.00000E+00   | 37.59  |
| 8.83281E-05    | 2.01020E-03    | 1.76656E-02   | 0.00000E+00   | 37.26  |
| 1.05994E-04    | 2.01020E-03    | 1.76656E-02   | 0.00000E+00   | 36.68  |
| 1.23659E-04    | 2.01020E-03    | 1.76656E-02   | 0.00000E+00   | 36.46  |
| 1.41325E-04    | 2.01020E-03    | 1.76656E-02   | 0.00000E+00   | 36.04  |
| 1.58991E-04    | 2.01020E-03    | 1.76656E-02   | 0.00000E+00   | 35.65  |
| 1.76656E-04    | 2.01020E-03    | 1.76656E-02   | 0.00000E+00   | 35.43  |
| 1.94322E-04    | 2.01020E-03    | 1.76656E-02   | 0.00000E+00   | 34.90  |
| 2.82850E-03    | 1.50226E-04    | 0.00000E+00   | 7.52865E-03   | 25.46  |
| 2.82850E-03    | 1.57755E-04    | 0.00000E+00   | 7.52865E-03   | 25.10  |
| 2.82850E-03    | 1.65283E-04    | 0.00000E+00   | 7.52865E-03   | 24.81  |
| 2.82850E-03    | 1.72812E-04    | 0.00000E+00   | 7.52865E-03   | 24.58  |
| 4.77504E-04    | 1.55116E-03    | 0.00000E+00   | 2.51148E-02   | 2.581  |
| 4.77504E-04    | 1.57627E-03    | 0.00000E+00   | 2.51148E-02   | 2.550  |
| 4.77504E-04    | 1.60139E-03    | 0.00000E+00   | 2.51148E-02   | 2.226  |
| 4.77504E-04    | 1.62650E-03    | 0.00000E+00   | 2.51148E-02   | 2.164  |
| 1.19397E-03    | 1.19158E-03    | 0.00000E+00   | 2.00596E-02   | 9.775  |
| 1.19397E-03    | 1.21164E-03    | 0.00000E+00   | 2.00596E-02   | 9.519  |
| 1.19397E-03    | 1.23170E-03    | 0.00000E+00   | 2.00596E-02   | 9.377  |
| 1.19397E-03    | 1.25176E-03    | 0.00000E+00   | 2.00596E-02   | 9.122  |
| 1.19397E-03    | 1.27182E-03    | 0.00000E+00   | 2.00596E-02   | 9.031  |
| 1.19397E-03    | 1.29188E-03    | 0.00000E+00   | 2.00596E-02   | 8.947  |
| 1.19397E-03    | 1.31194E-03    | 0.00000E+00   | 2.00596E-02   | 8.457  |
| 1.19397E-03    | 1.33200E-03    | 0.00000E+00   | 2.00596E-02   | 8.288  |
| 1.19397E-03    | 1.35206E-03    | 2.82225E-02   | 0.00000E+00   | 27.28  |
| 1.22219E-03    | 1.35206E-03    | 2.82225E-02   | 0.00000E+00   | 26.93  |
| 1.25042E-03    | 1.35206E-03    | 2.82225E-02   | 0.00000E+00   | 26.40  |
| 1.27864E-03    | 1.35206E-03    | 2.82225E-02   | 0.00000E+00   | 26.04  |
| 1.30686E-03    | 1.35206E-03    | 2.82225E-02   | 0.00000E+00   | 25.69  |
| 1.33508E-03    | 1.35206E-03    | 2.82225E-02   | 0.00000E+00   | 25.41  |
| 1.81933E-03    | 5.50327E-04    | 0.00000E+00   | 1.25561E-02   | 19.73  |
| 1.81933E-03    | 5.62883E-04    | 0.00000E+00   | 1.25561E-02   | 19.55  |
| 1.81933E-03    | 5.75439E-04    | 0.00000E+00   | 1.25561E-02   | 19.03  |
| 1.81933E-03    | 5.87995E-04    | 0.00000E+00   | 1.25561E-02   | 18.84  |
| 1.81933E-03    | 6.00552E-04    | 0.00000E+00   | 1.25561E-02   | 18.62  |
| 1.81933E-03    | 6.13108E-04    | 0.00000E+00   | 1.25561E-02   | 18.14  |
| 1.81933E-03    | 6.25664E-04    | 0.00000E+00   | 1.25561E-02   | 17.97  |

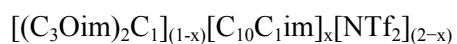

| $n_{1c}$ / mol | $n_{2c}$ / mol | $n_{1d}$ mmol | $n_{2d}$ mmol | Q / mJ |
|----------------|----------------|---------------|---------------|--------|
| 1.54050E-03    | 1.25568E-05    | 0.00000E+00   | 1.25568E-02   | 64.99  |
| 1.54050E-03    | 2.51136E-05    | 0.00000E+00   | 1.25568E-02   | 64.29  |
| 1.54050E-03    | 3.76704E-05    | 0.00000E+00   | 1.25568E-02   | 62.35  |
| 1.54050E-03    | 5.02271E-05    | 0.00000E+00   | 1.25568E-02   | 60.89  |
| 1.54050E-03    | 6.27839E-05    | 0.00000E+00   | 1.25568E-02   | 58.69  |
| 1.54050E-03    | 7.53408E-05    | 5.48241E-03   | 1.28289E-02   | 44.73  |
| 1.54598E-03    | 8.81697E-05    | 5.48241E-03   | 1.28289E-02   | 0.00   |
| 1.55146E-03    | 1.00999E-04    | 5.48241E-03   | 1.28289E-02   | 41.49  |
| 1.55695E-03    | 1.13828E-04    | 5.48241E-03   | 1.28289E-02   | 40.30  |
| 0.00000E+00    | 2.01771E-03    | 3.43166E-03   | 8.03012E-03   | 2.000  |
| 3.43166E-06    | 2.02574E-03    | 3.43166E-03   | 8.03012E-03   | 1.904  |
| 6.86331E-06    | 2.03377E-03    | 3.43166E-03   | 8.03012E-03   | 1.930  |
| 1.02950E-05    | 2.04180E-03    | 3.43166E-03   | 8.03012E-03   | 1.859  |
| 1.37266E-05    | 2.04983E-03    | 3.43166E-03   | 8.03012E-03   | 2.004  |
| 5.51193E-04    | 1.29007E-03    | 0.00000E+00   | 1.25568E-02   | 2.909  |
| 5.51193E-04    | 1.30263E-03    | 0.00000E+00   | 1.25568E-02   | 2.857  |
| 5.51193E-04    | 1.31518E-03    | 0.00000E+00   | 1.25568E-02   | 2.848  |
| 5.51193E-04    | 1.32774E-03    | 0.00000E+00   | 1.25568E-02   | 2.653  |
| 5.51193E-04    | 1.34030E-03    | 0.00000E+00   | 1.25568E-02   | 2.792  |
| 5.47192E-04    | 1.35285E-03    | 0.00000E+00   | 2.00607E-02   | 4.232  |
| 5.47192E-04    | 1.37291E-03    | 0.00000E+00   | 2.00607E-02   | 4.106  |
| 5.47192E-04    | 1.39297E-03    | 0.00000E+00   | 2.00607E-02   | 3.944  |
| 5.47192E-04    | 1.41303E-03    | 0.00000E+00   | 2.00607E-02   | 3.679  |
| 5.47192E-04    | 1.43310E-03    | 5.48241E-03   | 1.28289E-02   | -0.325 |
| 5.52674E-04    | 1.44593E-03    | 5.48241E-03   | 1.28289E-02   | -0.318 |
| 5.58157E-04    | 1.45876E-03    | 5.48241E-03   | 1.28289E-02   | -0.318 |
| 1.71556E-05    | 2.05786E-03    | 3.43166E-03   | 8.03012E-03   | 2.721  |
| 2.05873E-05    | 2.06589E-03    | 3.43166E-03   | 8.03012E-03   | 2.835  |
| 2.40189E-05    | 2.07392E-03    | 3.43166E-03   | 8.03012E-03   | 2.770  |
| 2.74506E-05    | 2.08195E-03    | 3.43166E-03   | 8.03012E-03   | 2.831  |

|             |             |             |             |       |
|-------------|-------------|-------------|-------------|-------|
| 1.26742E-03 | 3.55099E-04 | 0.00000E+00 | 2.00607E-02 | 46.22 |
| 1.26742E-03 | 3.75160E-04 | 0.00000E+00 | 2.00607E-02 | 44.44 |
| 1.26742E-03 | 3.95220E-04 | 0.00000E+00 | 2.00607E-02 | 42.89 |
| 8.72362E-04 | 8.62962E-04 | 1.57319E-02 | 4.40881E-03 | 5.146 |
| 8.88094E-04 | 8.67371E-04 | 1.57319E-02 | 4.40881E-03 | 5.028 |
| 9.03826E-04 | 8.71780E-04 | 1.57319E-02 | 4.40881E-03 | 4.793 |
| 1.26742E-03 | 4.15281E-04 | 1.08848E-02 | 1.07679E-02 | 4.850 |
| 1.27830E-03 | 4.26049E-04 | 1.08848E-02 | 1.07679E-02 | 4.617 |
| 1.28919E-03 | 4.36817E-04 | 1.08848E-02 | 1.07679E-02 | 4.646 |
| 9.19659E-04 | 9.16335E-04 | 0.00000E+00 | 2.00607E-02 | 16.23 |
| 9.19659E-04 | 9.36396E-04 | 0.00000E+00 | 2.00607E-02 | 15.81 |
| 9.19659E-04 | 9.56456E-04 | 0.00000E+00 | 2.00607E-02 | 14.26 |

---

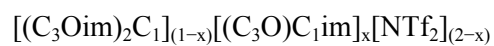

| $n_{1c} / \text{mol}$ | $n_{2c} / \text{mol}$ | $n_{1d} \text{ mmol}$ | $n_{2d} \text{ mmol}$ | $Q / \text{mJ}$ |
|-----------------------|-----------------------|-----------------------|-----------------------|-----------------|
| 0.00000E+00           | 1.53783E-03           | 1.76668E-02           | 0.00000E+00           | 3.116           |
| 1.76668E-05           | 1.53783E-03           | 1.76668E-02           | 0.00000E+00           | 3.061           |
| 3.53336E-05           | 1.53783E-03           | 1.76668E-02           | 0.00000E+00           | 3.020           |
| 5.30004E-05           | 1.53783E-03           | 1.76668E-02           | 0.00000E+00           | 2.936           |
| 7.06673E-05           | 1.53783E-03           | 9.86047E-03           | 9.93967E-03           | 0.715           |
| 8.05278E-05           | 1.54777E-03           | 9.86047E-03           | 9.93967E-03           | 0.711           |
| 9.03882E-05           | 1.55771E-03           | 9.86047E-03           | 9.93967E-03           | 0.695           |
| 1.00249E-04           | 1.56765E-03           | 9.86047E-03           | 9.93967E-03           | 0.674           |
| 1.15979E-03           | 1.02693E-03           | 2.82245E-02           | 0.00000E+00           | 1.526           |
| 1.18801E-03           | 1.02693E-03           | 2.82245E-02           | 0.00000E+00           | 1.449           |
| 1.21624E-03           | 1.02693E-03           | 2.82245E-02           | 0.00000E+00           | 1.387           |
| 1.27431E-03           | 8.61942E-04           | 2.82245E-02           | 0.00000E+00           | 1.140           |
| 1.30253E-03           | 8.61942E-04           | 2.82245E-02           | 0.00000E+00           | 1.106           |
| 1.33076E-03           | 8.61942E-04           | 2.82245E-02           | 0.00000E+00           | 1.081           |
| 1.35898E-03           | 8.61942E-04           | 2.82245E-02           | 0.00000E+00           | 1.062           |
| 1.38721E-03           | 8.61942E-04           | 3.53372E-02           | 0.00000E+00           | 1.339           |
| 1.42255E-03           | 8.61942E-04           | 3.53372E-02           | 0.00000E+00           | 1.314           |
| 1.45788E-03           | 8.61942E-04           | 3.53372E-02           | 0.00000E+00           | 1.305           |
| 3.94738E-04           | 1.39529E-03           | 3.53372E-02           | 0.00000E+00           | 4.399           |
| 4.30075E-04           | 1.39529E-03           | 3.53372E-02           | 0.00000E+00           | 4.261           |
| 4.65412E-04           | 1.39529E-03           | 3.53372E-02           | 0.00000E+00           | 4.123           |
| 5.00750E-04           | 1.39529E-03           | 3.53372E-02           | 0.00000E+00           | 3.998           |

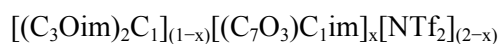

| $n_{1c}$ / mol | $n_{2c}$ / mol | $n_{1d}$ mmol | $n_{2d}$ mmol | Q / mJ |
|----------------|----------------|---------------|---------------|--------|
| 1.38438E-05    | 1.35225E-03    | 1.38437E-02   | 0.00000E+00   | -46.42 |
| 2.76875E-05    | 1.35225E-03    | 1.38437E-02   | 0.00000E+00   | -45.60 |
| 4.15313E-05    | 1.35225E-03    | 1.38437E-02   | 0.00000E+00   | -45.25 |
| 5.53750E-05    | 1.35225E-03    | 1.38437E-02   | 0.00000E+00   | -44.22 |
| 6.92188E-05    | 1.35225E-03    | 1.38437E-02   | 0.00000E+00   | -43.95 |
| 8.30625E-05    | 1.35225E-03    | 1.38437E-02   | 0.00000E+00   | -43.18 |
| 0.00000E+00    | 1.35091E-03    | 5.20120E-03   | 4.99924E-03   | -12.20 |
| 5.20120E-06    | 1.35591E-03    | 5.20120E-03   | 4.99924E-03   | -8.603 |
| 1.04024E-05    | 1.36091E-03    | 5.20120E-03   | 4.99924E-03   | -8.607 |
| 1.56036E-05    | 1.36591E-03    | 5.20120E-03   | 4.99924E-03   | -8.472 |
| 2.08048E-05    | 1.37091E-03    | 5.20120E-03   | 4.99924E-03   | -8.323 |
| 1.94655E-03    | 0.00000E+00    | 5.20120E-03   | 4.99924E-03   | -9.717 |
| 1.95175E-03    | 4.99924E-06    | 5.20120E-03   | 4.99924E-03   | -9.707 |
| 1.95695E-03    | 9.99847E-06    | 5.20120E-03   | 4.99924E-03   | -9.570 |
| 1.96215E-03    | 1.49977E-05    | 5.20120E-03   | 4.99924E-03   | -9.501 |
| 1.96735E-03    | 1.99969E-05    | 5.20120E-03   | 4.99924E-03   | -9.422 |
| 8.14258E-04    | 7.82750E-04    | 1.38437E-02   | 0.00000E+00   | -12.74 |
| 8.28102E-04    | 7.82750E-04    | 1.38437E-02   | 0.00000E+00   | -12.55 |
| 8.41945E-04    | 7.82750E-04    | 1.38437E-02   | 0.00000E+00   | -12.51 |
| 8.55789E-04    | 7.82750E-04    | 1.38437E-02   | 0.00000E+00   | -12.32 |
| 8.69633E-04    | 7.82750E-04    | 1.38437E-02   | 0.00000E+00   | -12.00 |
| 2.87780E-04    | 1.14515E-03    | 1.38437E-02   | 0.00000E+00   | -33.29 |
| 3.01624E-04    | 1.14515E-03    | 1.38437E-02   | 0.00000E+00   | -33.01 |
| 3.15467E-04    | 1.14515E-03    | 1.38437E-02   | 0.00000E+00   | -32.62 |
| 3.29311E-04    | 1.14515E-03    | 1.38437E-02   | 0.00000E+00   | -31.85 |
| 3.43155E-04    | 1.14515E-03    | 1.38437E-02   | 0.00000E+00   | -31.55 |
| 1.41894E-03    | 3.62260E-04    | 1.93896E-02   | 0.00000E+00   | -2.718 |
| 1.43833E-03    | 3.62260E-04    | 1.93896E-02   | 0.00000E+00   | -2.661 |
| 1.45772E-03    | 3.62260E-04    | 1.93896E-02   | 0.00000E+00   | -2.590 |
| 1.47711E-03    | 3.62260E-04    | 1.93896E-02   | 0.00000E+00   | -2.521 |

| 1.49650E-03                                                                                                                                                                | 3.62260E-04           | 1.93896E-02          | 0.00000E+00          | -2.371 |
|----------------------------------------------------------------------------------------------------------------------------------------------------------------------------|-----------------------|----------------------|----------------------|--------|
| [[C <sub>3</sub> Oim) <sub>2</sub> C <sub>1</sub> ] <sub>(1-x)</sub> [(C <sub>5</sub> O <sub>2</sub> )C <sub>1</sub> im] <sub>x</sub> [NTf <sub>2</sub> ] <sub>(2-x)</sub> |                       |                      |                      |        |
| n <sub>1c</sub> / mol                                                                                                                                                      | n <sub>2c</sub> / mol | n <sub>1d</sub> mmol | n <sub>2d</sub> mmol | Q / mJ |
| 0.00000E+00                                                                                                                                                                | 1.34664E-03           | 1.54966E-02          | 0.00000E+00          | -13.38 |
| 1.54966E-05                                                                                                                                                                | 1.34664E-03           | 1.54966E-02          | 0.00000E+00          | -13.55 |
| 3.09932E-05                                                                                                                                                                | 1.34664E-03           | 1.54966E-02          | 0.00000E+00          | -13.00 |
| 4.64898E-05                                                                                                                                                                | 1.34664E-03           | 1.54966E-02          | 0.00000E+00          | -12.99 |
| 6.19864E-05                                                                                                                                                                | 1.34664E-03           | 1.54966E-02          | 0.00000E+00          | -12.68 |
| 0.00000E+00                                                                                                                                                                | 1.36245E-03           | 5.90678E-03          | 5.92098E-03          | -2.519 |
| 5.90678E-06                                                                                                                                                                | 1.36837E-03           | 5.90678E-03          | 5.92098E-03          | -2.486 |
| 1.18136E-05                                                                                                                                                                | 1.37429E-03           | 5.90678E-03          | 5.92098E-03          | -2.459 |
| 1.77204E-05                                                                                                                                                                | 1.38021E-03           | 5.90678E-03          | 5.92098E-03          | -2.404 |
| 2.36271E-05                                                                                                                                                                | 1.38613E-03           | 5.90678E-03          | 5.92098E-03          | -2.373 |
| 2.95364E-05                                                                                                                                                                | 1.39205E-03           | 9.43666E-03          | 9.45934E-03          | -3.839 |
| 3.89731E-05                                                                                                                                                                | 1.40151E-03           | 9.43666E-03          | 9.45934E-03          | -3.577 |
| 4.84097E-05                                                                                                                                                                | 1.41097E-03           | 9.43666E-03          | 9.45934E-03          | -3.550 |
| 5.78464E-05                                                                                                                                                                | 1.42043E-03           | 9.43666E-03          | 9.45934E-03          | -3.468 |
| 2.18125E-03                                                                                                                                                                | 0.00000E+00           | 8.27304E-03          | 8.29292E-03          | -4.843 |
| 2.18952E-03                                                                                                                                                                | 8.29292E-06           | 8.27304E-03          | 8.29292E-03          | -4.663 |
| 2.19780E-03                                                                                                                                                                | 1.65858E-05           | 8.27304E-03          | 8.29292E-03          | -4.512 |
| 2.20607E-03                                                                                                                                                                | 2.48788E-05           | 8.27304E-03          | 8.29292E-03          | -4.412 |
| 8.29070E-04                                                                                                                                                                | 8.30927E-04           | 2.47573E-02          | 0.00000E+00          | -5.981 |
| 8.53827E-04                                                                                                                                                                | 8.30927E-04           | 2.47573E-02          | 0.00000E+00          | -5.765 |
| 8.78585E-04                                                                                                                                                                | 8.30927E-04           | 2.47573E-02          | 0.00000E+00          | -5.652 |
| 9.03342E-04                                                                                                                                                                | 8.30927E-04           | 2.47573E-02          | 0.00000E+00          | -5.561 |
| 9.28099E-04                                                                                                                                                                | 8.30927E-04           | 2.47573E-02          | 0.00000E+00          | -5.387 |
| 2.92125E-04                                                                                                                                                                | 1.16098E-03           | 2.17045E-02          | 0.00000E+00          | -12.80 |
| 3.13830E-04                                                                                                                                                                | 1.16098E-03           | 2.17045E-02          | 0.00000E+00          | -12.42 |
| 3.35534E-04                                                                                                                                                                | 1.16098E-03           | 2.17045E-02          | 0.00000E+00          | -12.07 |
| 3.57239E-04                                                                                                                                                                | 1.16098E-03           | 2.17045E-02          | 0.00000E+00          | -11.95 |
| 3.78943E-04                                                                                                                                                                | 1.16098E-03           | 2.17045E-02          | 0.00000E+00          | -11.48 |

|             |             |             |             |        |
|-------------|-------------|-------------|-------------|--------|
| 1.55317E-03 | 3.96754E-04 | 9.43666E-03 | 9.45934E-03 | -1.977 |
| 1.56261E-03 | 4.06213E-04 | 9.43666E-03 | 9.45934E-03 | -1.966 |
| 1.57204E-03 | 4.15673E-04 | 9.43666E-03 | 9.45934E-03 | -1.926 |
| 1.58148E-03 | 4.25132E-04 | 9.43666E-03 | 9.45934E-03 | -1.887 |

---

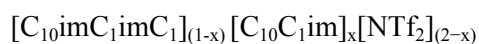

| $n_{1c}$ / mol | $n_{2c}$ / mol | $n_{1d}$ mmol | $n_{2d}$ mail | Q / mJ |
|----------------|----------------|---------------|---------------|--------|
| 0.00000E+00    | 1.76247E-03    | 6.97378E-03   | 6.95428E-03   | 3.948  |
| 6.97378E-06    | 1.76942E-03    | 6.97378E-03   | 6.95428E-03   | 3.779  |
| 1.39476E-05    | 1.77638E-03    | 6.97378E-03   | 6.95428E-03   | 3.587  |
| 2.09213E-05    | 1.78333E-03    | 6.97378E-03   | 6.95428E-03   | 3.521  |
| 2.78951E-05    | 1.79029E-03    | 6.97378E-03   | 6.95428E-03   | 3.455  |
| 1.16414E-03    | 0.00000E+00    | 0.00000E+00   | 1.25568E-02   | 7.997  |
| 1.16414E-03    | 1.25568E-05    | 0.00000E+00   | 1.25568E-02   | 7.971  |
| 1.16414E-03    | 2.51136E-05    | 0.00000E+00   | 1.25568E-02   | 7.771  |
| 1.16414E-03    | 3.76703E-05    | 0.00000E+00   | 1.25568E-02   | 7.696  |
| 1.16414E-03    | 5.02271E-05    | 0.00000E+00   | 1.25568E-02   | 7.754  |
| 6.98325E-04    | 7.14034E-04    | 0.00000E+00   | 1.75870E-02   | 4.075  |
| 6.98325E-04    | 7.31621E-04    | 0.00000E+00   | 1.75870E-02   | 3.827  |
| 6.98325E-04    | 7.49208E-04    | 0.00000E+00   | 1.75870E-02   | 3.913  |
| 6.98325E-04    | 7.66795E-04    | 0.00000E+00   | 1.75870E-02   | 3.731  |
| 0.00000E+00    | 1.76247E-03    | 6.97378E-03   | 6.95428E-03   | 3.948  |
| 6.97378E-06    | 1.76942E-03    | 6.97378E-03   | 6.95428E-03   | 3.779  |
| 1.39476E-05    | 1.77638E-03    | 6.97378E-03   | 6.95428E-03   | 3.587  |
| 2.09213E-05    | 1.78333E-03    | 6.97378E-03   | 6.95428E-03   | 3.521  |
| 2.78951E-05    | 1.79029E-03    | 6.97378E-03   | 6.95428E-03   | 3.455  |
| 1.16414E-03    | 0.00000E+00    | 0.00000E+00   | 1.25568E-02   | 7.997  |
| 1.16414E-03    | 1.25568E-05    | 0.00000E+00   | 1.25568E-02   | 7.971  |
| 1.16414E-03    | 2.51136E-05    | 0.00000E+00   | 1.25568E-02   | 7.771  |
| 1.16414E-03    | 3.76703E-05    | 0.00000E+00   | 1.25568E-02   | 7.696  |

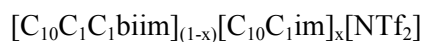

| $n_{1c}$ / mol | $n_{2c}$ / mol | $n_{1d}$ mmol | $n_{2d}$ mail | Q / mJ |
|----------------|----------------|---------------|---------------|--------|
| 8.16148E-04    | 8.59466E-04    | 0.00000E+00   | 2.00607E-02   | 1.844  |
| 8.16148E-04    | 8.79527E-04    | 0.00000E+00   | 2.00607E-02   | 1.846  |
| 8.16148E-04    | 8.99587E-04    | 0.00000E+00   | 2.00607E-02   | 1.737  |
| 8.16148E-04    | 9.19648E-04    | 0.00000E+00   | 2.00607E-02   | 1.860  |



|             |             |             |             |       |
|-------------|-------------|-------------|-------------|-------|
| 1.53591E-03 | 1.75871E-05 | 0.00000E+00 | 1.75870E-02 | 5.190 |
| 1.53591E-03 | 3.51741E-05 | 0.00000E+00 | 1.75870E-02 | 5.053 |
| 1.53591E-03 | 5.27612E-05 | 0.00000E+00 | 1.75870E-02 | 4.922 |
| 1.53591E-03 | 7.03482E-05 | 0.00000E+00 | 1.75870E-02 | 4.864 |
| 1.25530E-03 | 3.41226E-04 | 0.00000E+00 | 2.00607E-02 | 3.930 |
| 1.25530E-03 | 3.61287E-04 | 0.00000E+00 | 2.00607E-02 | 3.843 |
| 1.25530E-03 | 3.81347E-04 | 0.00000E+00 | 2.00607E-02 | 3.745 |
| 1.25530E-03 | 4.01408E-04 | 0.00000E+00 | 2.00607E-02 | 3.589 |

---

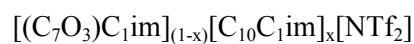

| $n_{1c}$ / mol | $n_{2c}$ / mol | $n_{1d}$ mmol | $n_{2d}$ mail | Q / mJ |
|----------------|----------------|---------------|---------------|--------|
| 1.10792E-04    | 1.75575E-03    | 1.38438E-02   | 0.00000E+00   | 18.01  |
| 1.24636E-04    | 1.75575E-03    | 1.38438E-02   | 0.00000E+00   | 17.83  |
| 1.38480E-04    | 1.75575E-03    | 1.38438E-02   | 0.00000E+00   | 17.33  |
| 9.21164E-04    | 1.04553E-03    | 0.00000E+00   | 2.00732E-02   | 5.977  |
| 9.21164E-04    | 1.06560E-03    | 0.00000E+00   | 2.00732E-02   | 5.853  |
| 9.21164E-04    | 1.08568E-03    | 0.00000E+00   | 2.00732E-02   | 5.462  |
| 9.21164E-04    | 1.10586E-03    | 1.93896E-02   | 0.00000E+00   | 12.76  |
| 9.40554E-04    | 1.10586E-03    | 1.93896E-02   | 0.00000E+00   | 12.53  |
| 9.59943E-04    | 1.10586E-03    | 1.93896E-02   | 0.00000E+00   | 12.43  |
| 9.79333E-04    | 1.10586E-03    | 1.93896E-02   | 0.00000E+00   | 12.33  |
| 9.98722E-04    | 1.10586E-03    | 1.93896E-02   | 0.00000E+00   | 12.17  |

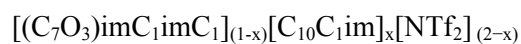

| $n_{1c}$ / mol | $n_{2c}$ / mol | $n_{1d}$ mmol | $n_{2d}$ mail | Q / mJ |
|----------------|----------------|---------------|---------------|--------|
| 4.43000E-05    | 1.81000E-03    | 7.39000E-03   | 7.38000E-03   | 9.050  |
| 5.17000E-05    | 1.82000E-03    | 7.39000E-03   | 7.38000E-03   | 8.800  |
| 5.91000E-05    | 1.82000E-03    | 7.39000E-03   | 7.38000E-03   | 8.530  |
| 1.29000E-03    | 1.76000E-05    | 0.00000E+00   | 1.76000E-02   | 107.0  |
| 1.29000E-03    | 3.52000E-05    | 0.00000E+00   | 1.76000E-02   | 102.0  |
| 1.29000E-03    | 5.28000E-05    | 0.00000E+00   | 1.76000E-02   | 96.90  |
| 1.29000E-03    | 7.03000E-05    | 0.00000E+00   | 1.76000E-02   | 96.00  |
| 1.29000E-03    | 8.79000E-05    | 0.00000E+00   | 1.76000E-02   | 89.90  |
| 1.29000E-03    | 1.06000E-04    | 0.00000E+00   | 1.76000E-02   | 84.80  |
| 1.29000E-03    | 1.23000E-04    | 0.00000E+00   | 1.76000E-02   | 82.40  |
| 7.39000E-04    | 8.26000E-04    | 0.00000E+00   | 1.76000E-02   | 17.20  |
| 7.39000E-04    | 8.44000E-04    | 0.00000E+00   | 1.76000E-02   | 16.90  |
| 7.39000E-04    | 8.62000E-04    | 0.00000E+00   | 1.76000E-02   | 16.60  |

**Figure S7**

Partial molar enthalpies,  $HE_i$ , of the components of the mixtures [and enthalpies of mixing,  $\Delta_{mix}H$ , of each system. Lines are the Redlich-Kister fitting curves with the parameters reported in Table S4 and  $\blacksquare$ ,  $\bullet$  are experimental data. In the graphs of the right hand side are plotted the differences between the experimental heat effects,  $Q_{exp}$ , and the ones calculated,  $Q_{calc}$ , with the fitting parameters collected in Table S4.

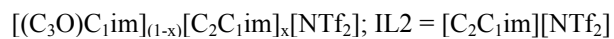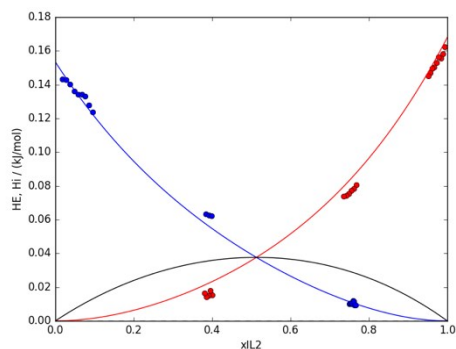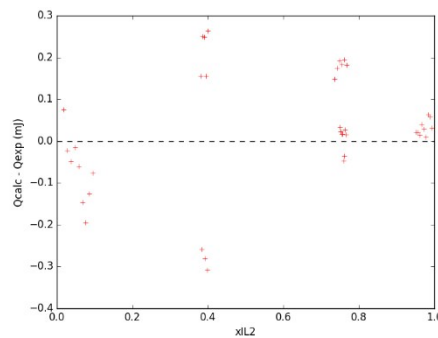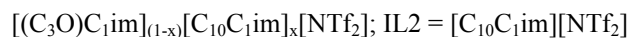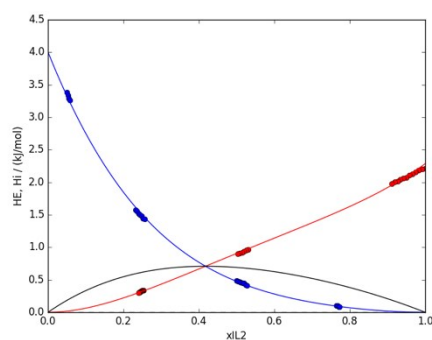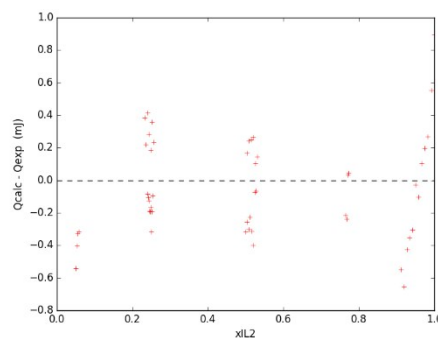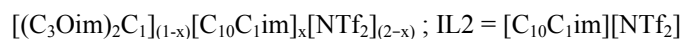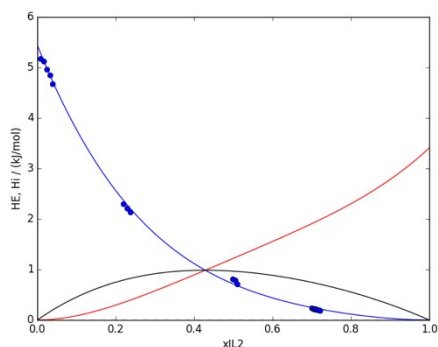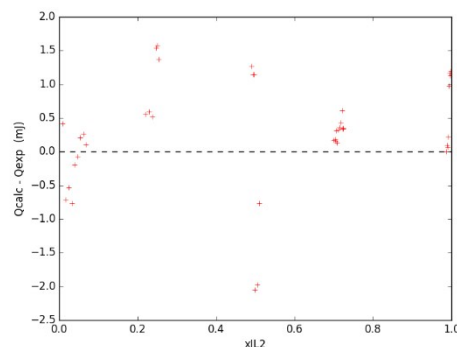

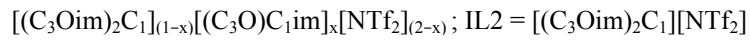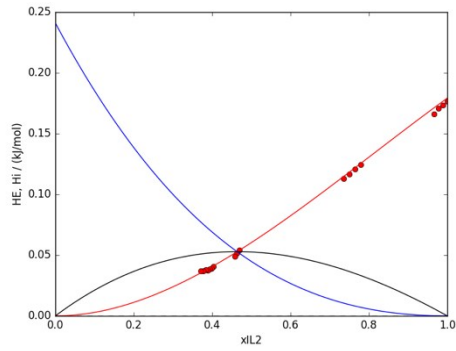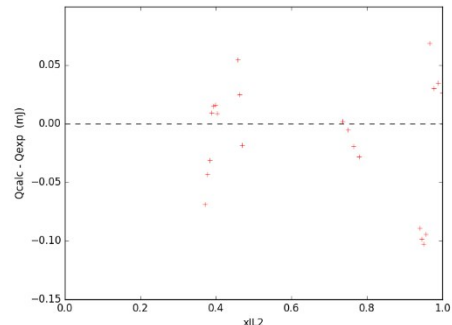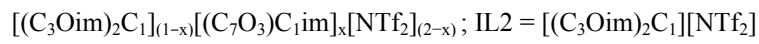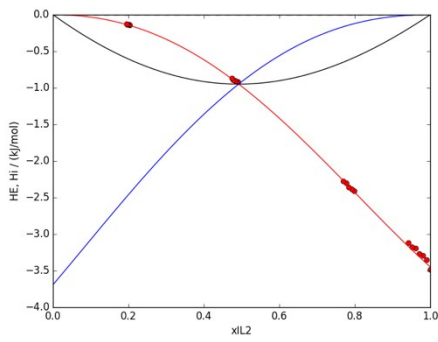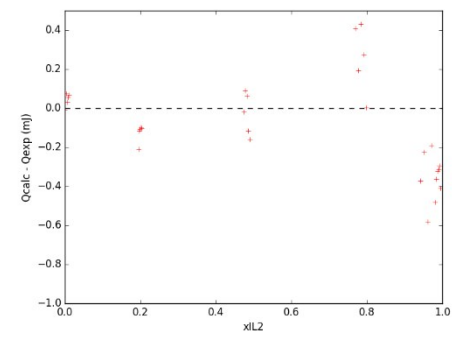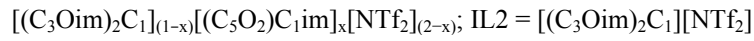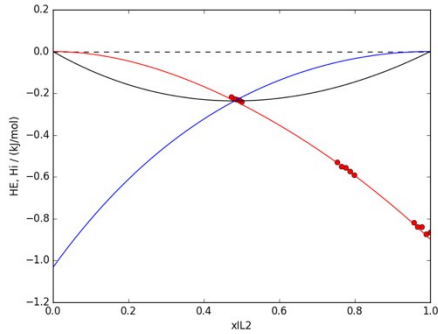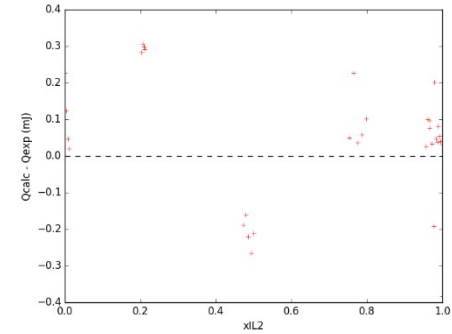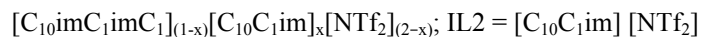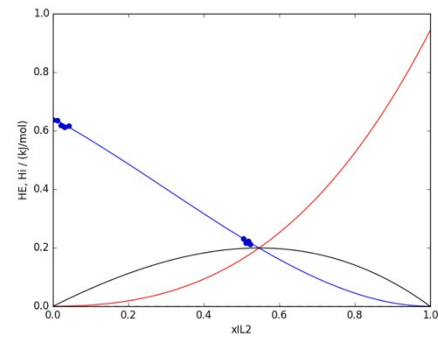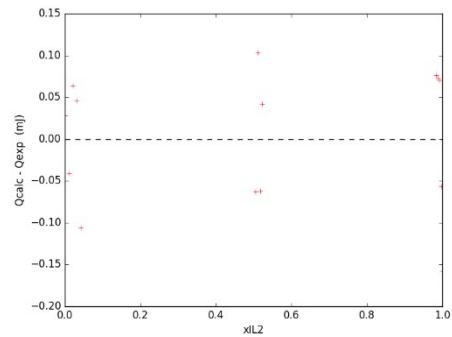

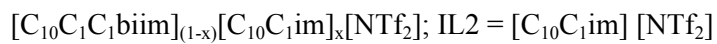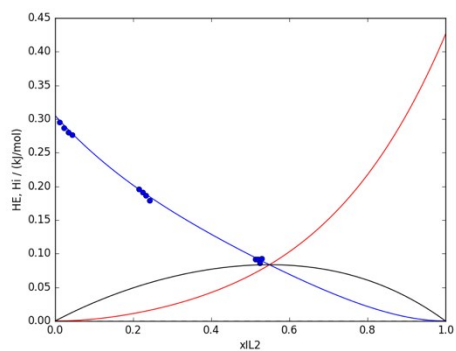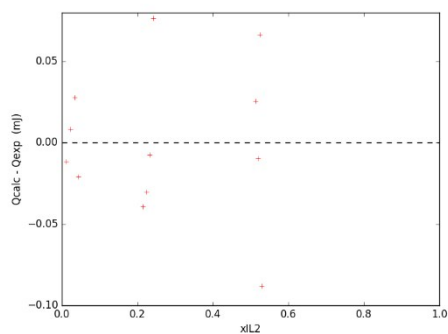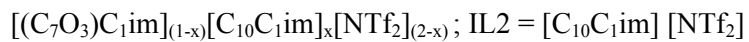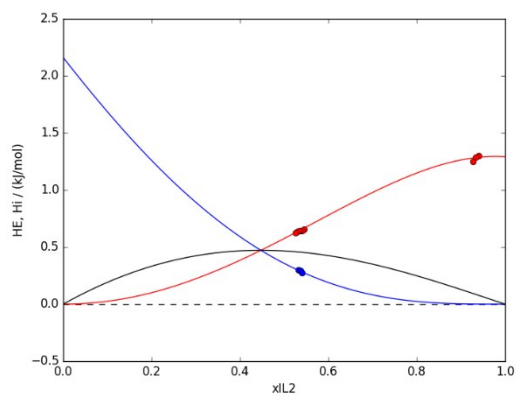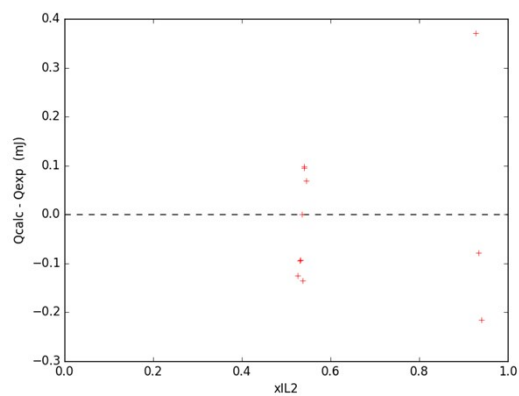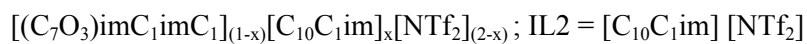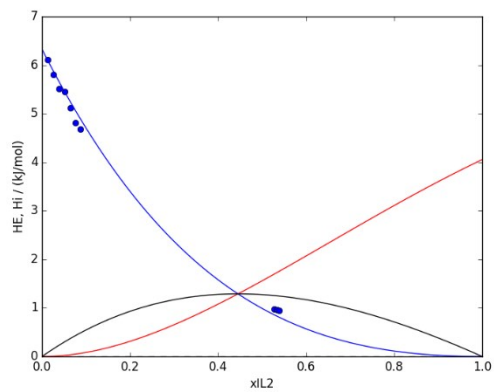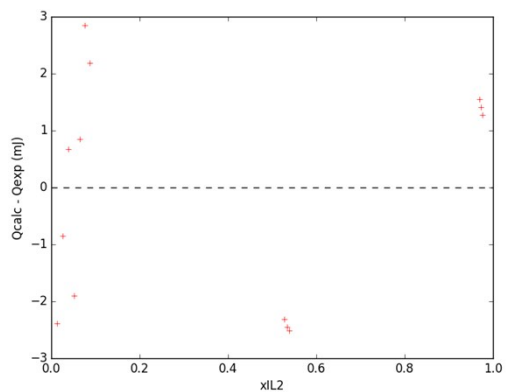

**Table S13**

Parameters obtained for the fitting of the partial IL excess enthalpies with the Redlich-Kister equation corresponding to the systems studied in this work.

| System                                                       | a <sub>0</sub> | a <sub>1</sub> | a <sub>2</sub> |
|--------------------------------------------------------------|----------------|----------------|----------------|
| $[(C_3O)C_1im]_{(1-x)}[C_2C_1im]_x[NTf_2]$                   | + 0.14996      | - 0.00646      | + 0.00900      |
| $[(C_3O)C_1im]_{(1-x)}[C_{10}C_1im]_x[NTf_2]$                | + 2.76041      | + 0.85944      | + 0.38433      |
| $[(C_3Oim)_2C_1]_{(1-x)}[C_{10}C_1im]_x[NTf_2]_{(2-x)}$      | + 3.86665      | + 1.01538      | + 0.55669      |
| $[(C_3Oim)_2C_1]_{(1-x)}[(C_3O)C_1im]_x[NTf_2]_{(2-x)}$      | + 0.21027      | + 0.03092      | - 0.00014      |
| $[(C_3Oim)_2C_1]_{(1-x)}[(C_7O_3)C_1im]_x[NTf_2]_{(2-x)}$    | - 3.78385      | - 0.18174      | + 0.13038      |
| $[(C_3Oim)_2C_1]_{(1-x)}[(C_5O_2)C_1im]_x[NTf_2]_{(2-x)}$    | - 0.94444      | - 0.06775      | - 0.02090      |
| $[C_{10}imC_1imC_1]_{(1-x)}[C_{10}C_1im]_x[NTf_2]_{(2-x)}$   | + 0.78975      | - 0.14987      | + 0.00305      |
| $[C_{10}C_1C_1biim]_{(1-x)}[C_{10}C_1im]_x[NTf_2]$           | + 0.33121      | - 0.06027      | + 0.03413      |
| $[(C_7O_3)C_1im]_{(1-x)}[C_{10}C_1im]_x[NTf_2]$              | + 1.86422      | + 0.43468      | - 0.13858      |
| $[(C_7O_3)imC_1imC_1]_{(1-x)}[C_{10}C_1im]_x[NTf_2]_{(2-x)}$ | + 5.09528      | + 1.13648      | + 0.09566      |

## References

- 1 B. K. and S. B. T. Moumene, E. H. Belarbi, B. Haddad, D. Villemin, O. Abbas, *J. Mol. Struct. THEOCHEM*, 2015, **1083**, 179–186.
- 2 B. Haddad, T. Moumene, D. Villemin, J.-F. Lohier and E.-H. Belarbi, *Bull. Mater. Sci.*, 2016, **39**, 797–801.
- 3 Q. Liu, F. van Rantwijk and R. A. Sheldon, *J. Chem. Technol. Biotechnol.*, 2006, **81**, 401–405.
- 4 K. R. J. Lovelock, A. Deyko, J.-A. Corfield, P. N. Gooden, P. Licence and R. G. Jones, *ChemPhysChem*, 2009, **10**, 337–340.
- 5 A. E. and D. W. A. J. L. Anderson, R. Ding, *J. Am. Chem. Soc.*, 2005, **127**, 593–604.
- 6 H. S. Schrekker, D. O. Silva, M. A. Gelesky, M. P. Stracke, C. M. L. Schrekker, R. S. Gonçalves and J. Dupont, *J. Braz. Chem. Soc.*, 2008, **19**, 426–433.
- 7 M. T. Clough, K. Geyer, P. a. Hunt, J. Mertes and T. Welton, *Phys. Chem. Chem. Phys.*, 2013, **15**, 20480.
- 8 S. I. Lall-Ramnarine, M. Zhao, C. Rodriguez, R. Fernandez, N. Zmich, E. D. Fernandez, S. B. Dhiman, E. W. Castner and J. F. Wishart, *J. Electrochem. Soc.*, 2017, **164**, H5247–H5262.
- 9 S. Krakert, N. Ballav, M. Zharnikov and A. Terfort, *Phys. Chem. Chem. Phys.*, 2009, **12**, 507–515.
- 10 WO 2008000726, 2008.
- 11 M. Zhu, K. Fujita and R. Yamaguchi, *Chem. Commun. Camb. Engl.*, 2011, **47**, 12876–12878.
- 12 D. T. Weiss, S. Haslinger, C. Jandl, A. Pöthig, M. Cokoja and F. E. Kühn, *Inorg. Chem.*, 2015, **54**, 415–417.
- 13 T. J. Wooster, K. M. Johanson, K. J. Fraser, D. R. MacFarlane and J. L. Scott, *Green Chem.*, 2006, **8**, 691.
- 14 J. Jacquemin, R. Ge, P. Nancarrow, D. W. Rooney, M. F. Costa Gomes, A. A. H. Pádua and C. Hardacre, *J. Chem. Eng. Data*, 2008, **53**, 716–726.
- 15 Y. Deng, S. Morrissey, N. Gathergood, A.-M. Delort, P. Husson and M. F. Costa Gomes, *ChemSusChem*, 2010, **3**, 377–385.
